# Supplementary material for: Immunoproteomic Analysis Reveals Novel Candidate Antigens for the Diagnosis of Paracoccidioidomycosis Due to Paracoccidioides lutzii
Source: PubMed Central journal article supplement (PMC7770604; doi:10.3390/jof6040357), 2020-12-11
Supplement: jof-06-00357-s001.pdf [file jof-06-00357-s001.pdf]

# Immunoproteomic Analysis Reveals Novel Candidate Antigens for the Diagnosis of Paracoccidioidomycosis Due to *Paracoccidioides lutzii*

Anderson Messias Rodrigues<sup>1\*</sup>, Paula Helena Kubitschek Barreira<sup>2</sup>, Breno Gonçalves Pinheiro<sup>1</sup>, André Teixeira-Ferreira<sup>3</sup>, Rosane Cristine Hahn<sup>4,5</sup>, Zoilo Pires de Camargo<sup>1,6\*</sup>

<sup>1</sup> Laboratory of Emerging Fungal Pathogens, Department of Microbiology, Immunology, and Parasitology, Discipline of Cellular Biology, Federal University of São Paulo (UNIFESP), São Paulo 04023062, Brazil.

<sup>2</sup> Department of Cellular Biology, Roberto Alcantara Gomes Institute of Biology, Rio de Janeiro State University (UERJ), Rio de Janeiro, 20511010, Brazil.

<sup>3</sup> Department of Physiology and Pharmacodynamics, Toxinology Laboratory, Fiocruz, Rio de Janeiro 21040900, RJ, Brazil.

<sup>4</sup> Laboratory of Mycology/Research, Faculty of Medicine, Federal University of Mato Grosso, Cuiabá, Mato Grosso 78060900, Brazil.

<sup>5</sup> Federal University of Mato Grosso, Júlio Muller University Hospital, Mato Grosso 78048902, Brazil

<sup>6</sup> Department of Medicine, Discipline of Infectious Diseases, Federal University of São Paulo (UNIFESP), São Paulo 04023062, Brazil.

\* Correspondence: (ZPC) zpcamargo1@gmail.com; Tel.: +55-1155764551 Ext. 1512. (AMR) amrodrigues@unifesp.br; Tel.: +55-1155764551 Ext. 1540.

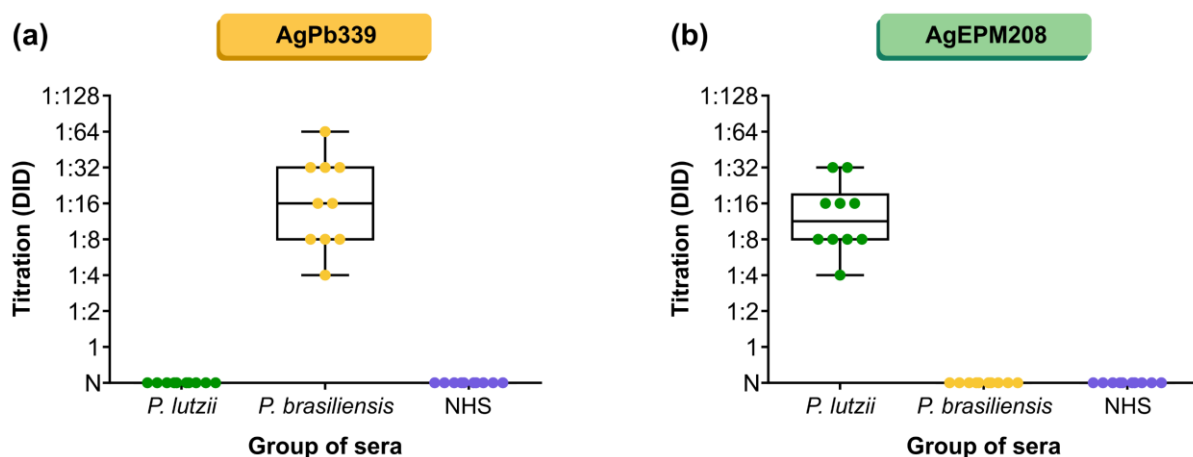

**Figure S1.** Anti-*Paracoccidioides* antibody titers in reactive sera of patients with paracoccidioidomycosis due to *P. brasiliensis sensu stricto* (S1; n=10) or *P. lutzii* (n=10). NHS: normal human serum (sera from the healthy normal donors; n=10). A quantitative double immunodiffusion assay (DID) was used to establish the titration of each patient's serum using (a) the exoantigens from the reference B-339 strain (AgPbB339; PS3) or (b) a *P. lutzii* CFA preparation derived from the reference isolate EPM208 as described earlier [1,2]. Each dot represents the result of a single patient. Bars represent the lowest (Min) and the highest (Max) value in each column.

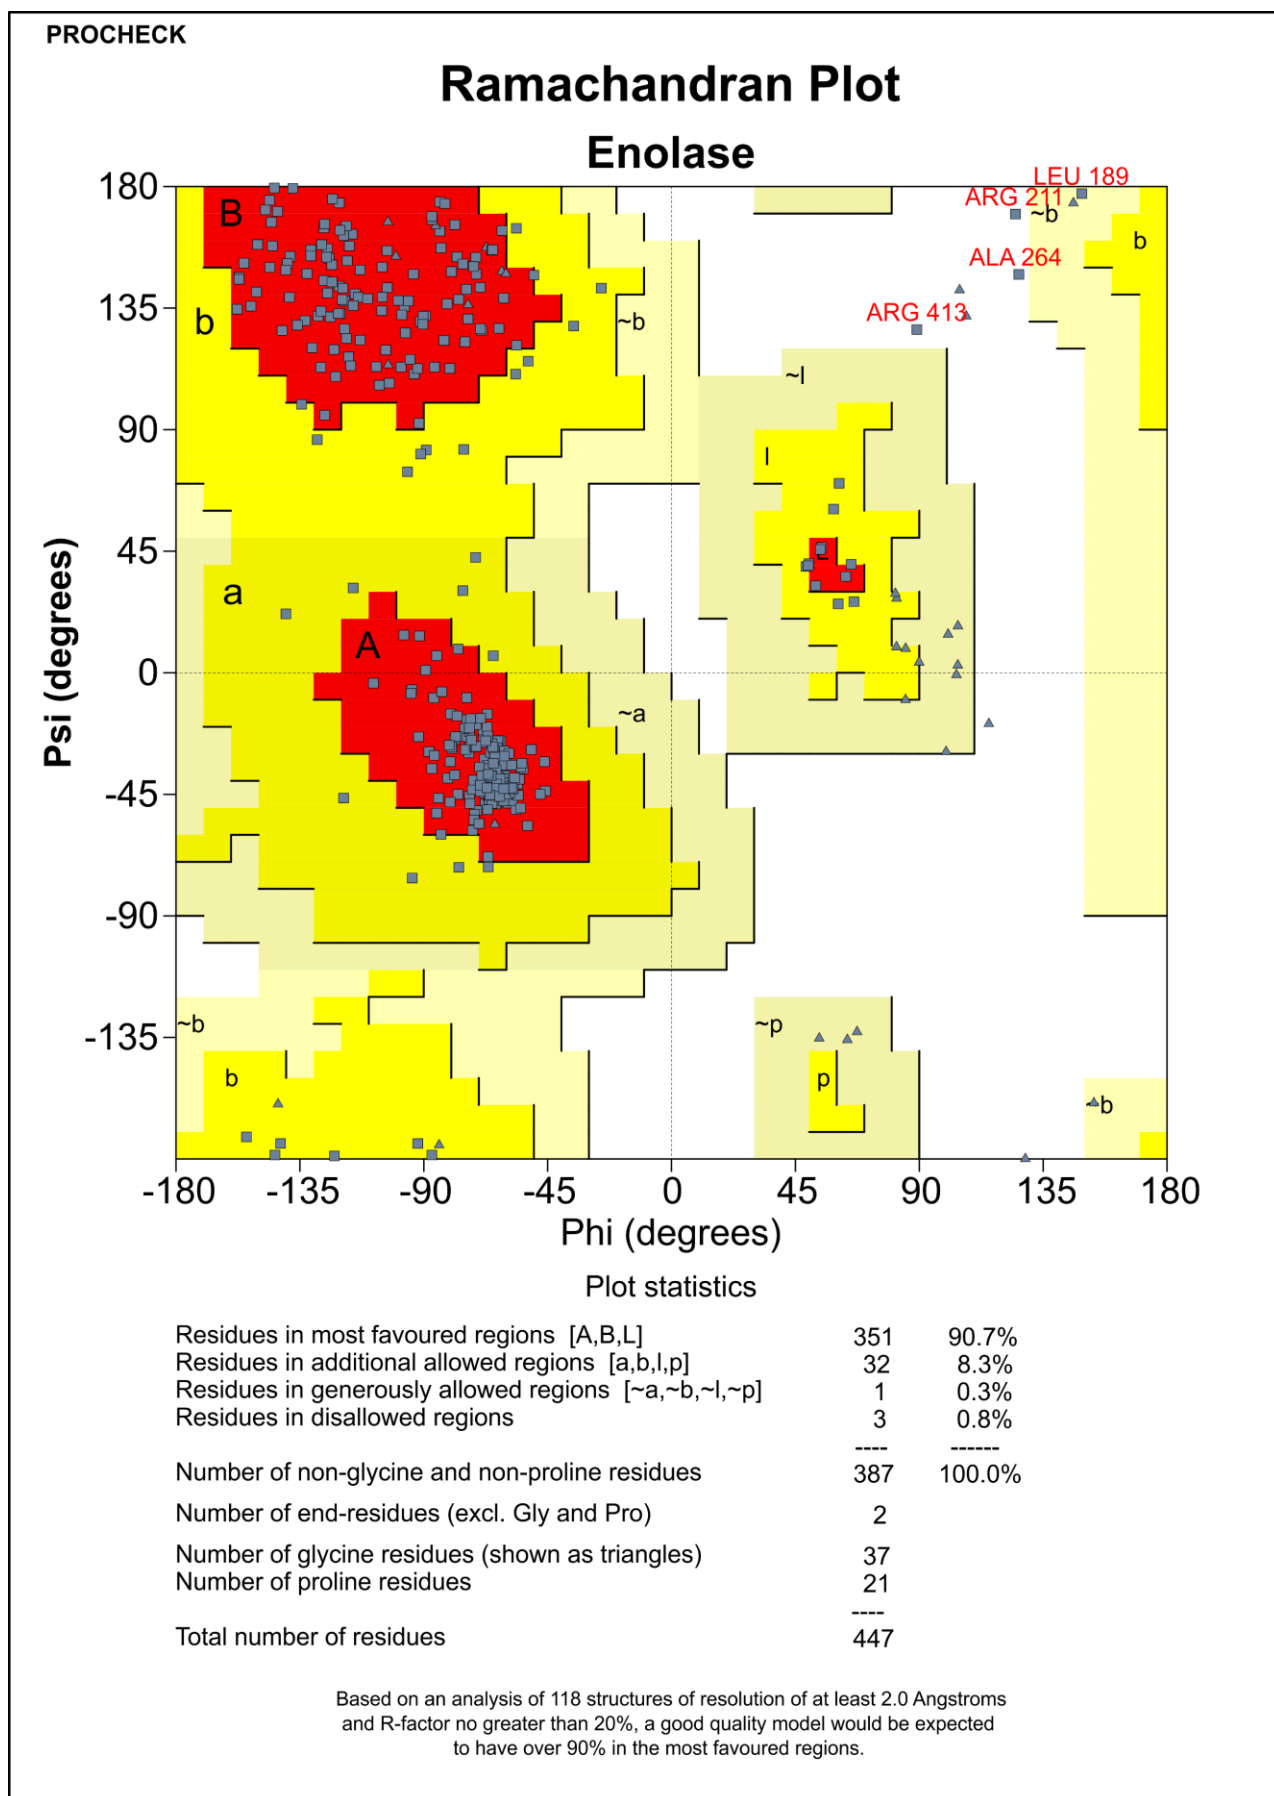

**Figure S2.** Ramachandran plot generated by PROCHECK validation server [3] showing the stereochemical quality of the *Paracoccidioides lutzii* enolase structure (accession number: XP\_015703472).

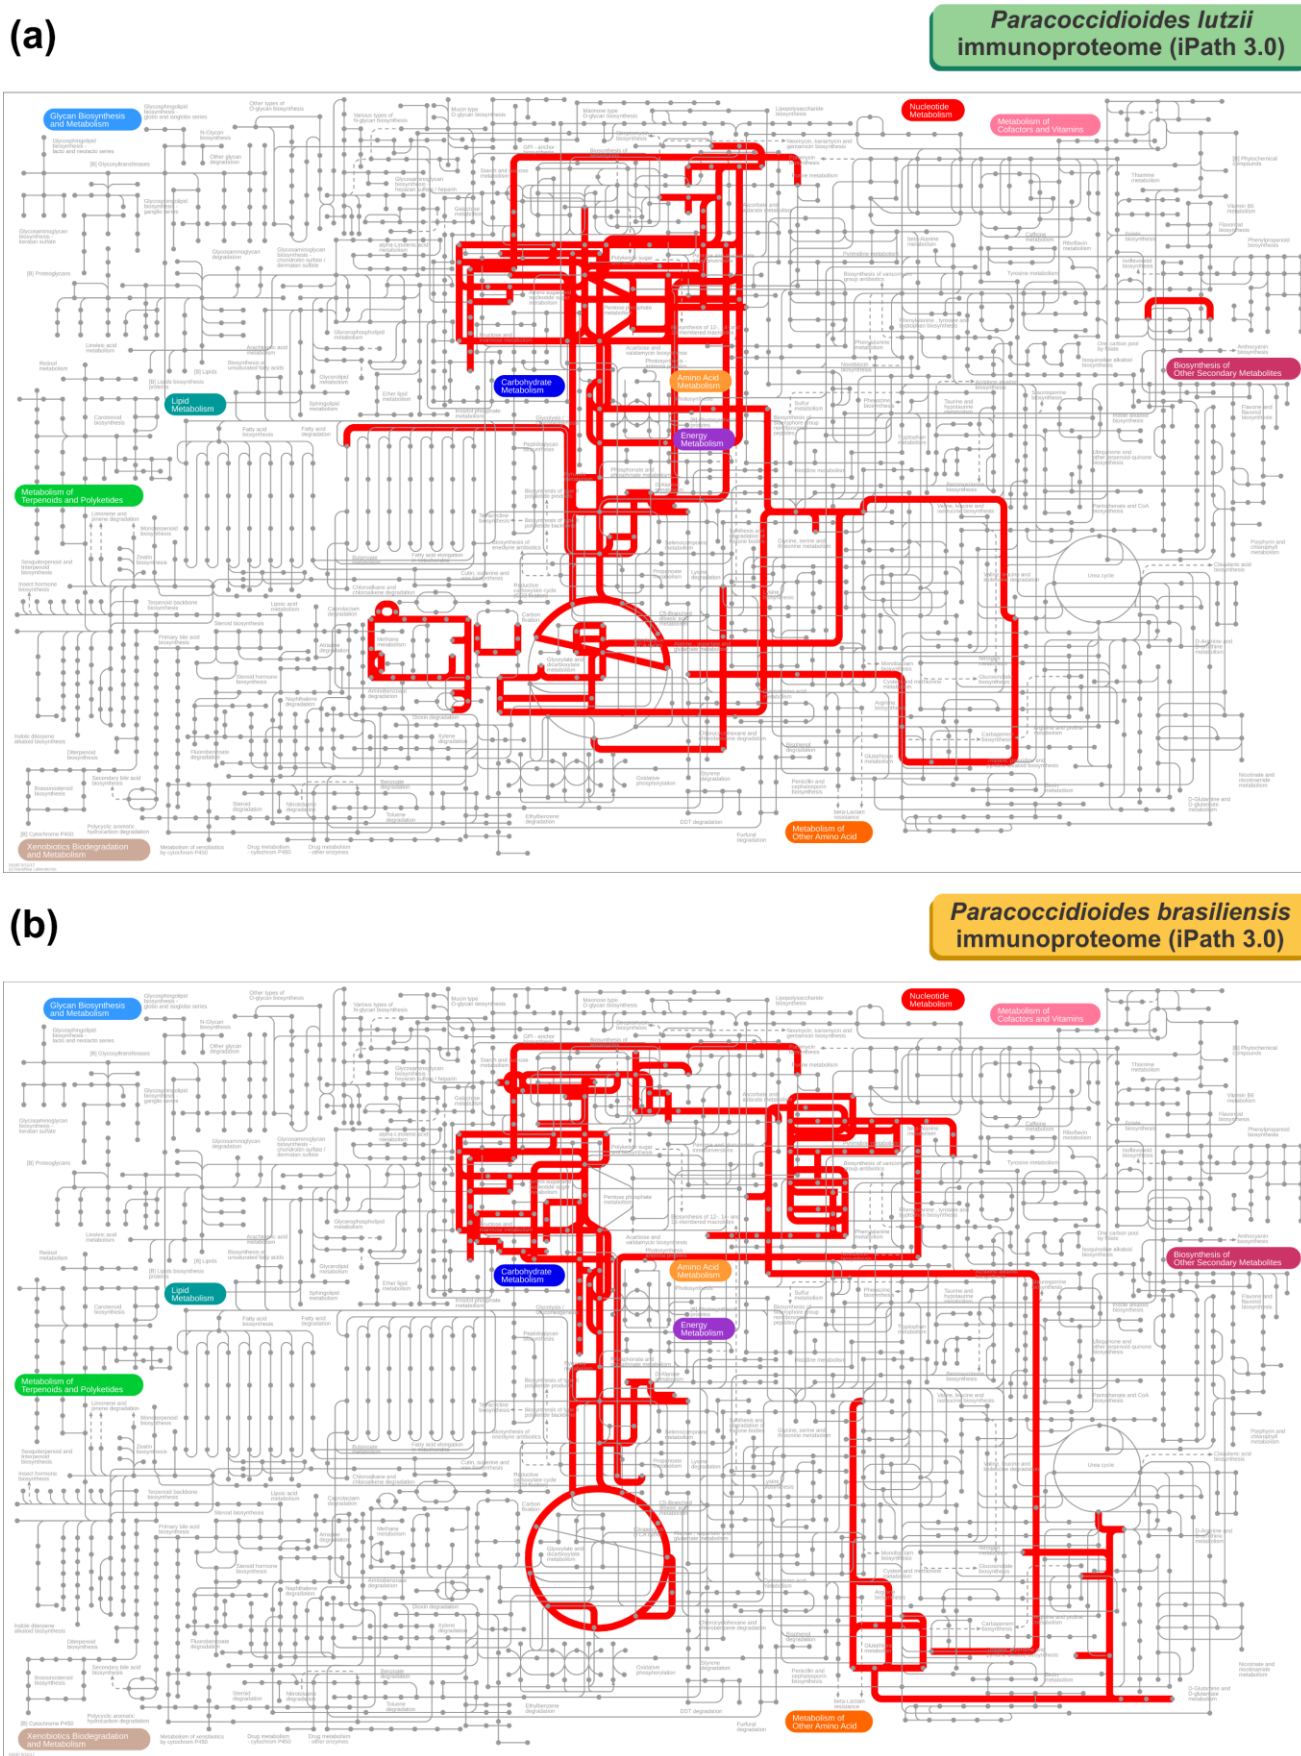

**Figure S3.** Overview of the metabolic pathways in **(a)** *P. lutzii* and **(b)** *P. brasiliensis* proteomes. The red lines represent proteins (IgG immunoreactive) that were highly enriched, and the boxes represent metabolic pathways. These metabolic maps were visualized and analyzed by the web-application iPath3.0 [4].

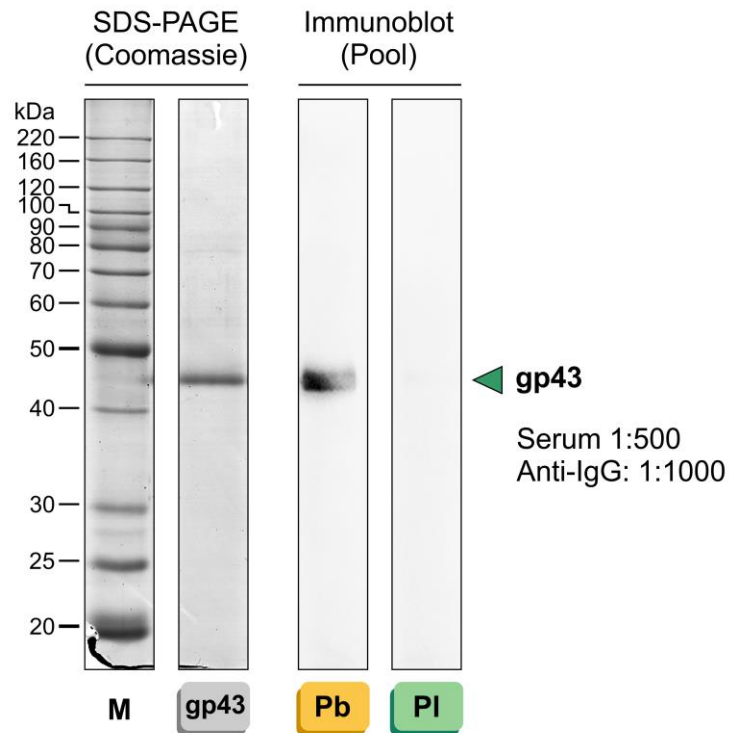

**Figure S4.** Representative immunoblot of purified gp43 antigen (B-339 strain) using sera from patients with confirmed paracoccidioidomycosis due to *P. brasiliensis* s. str. (Pb, yellow lane) or *P. lutzii* (PI, green lane). For immunoblotting, gp43 (250 ng) was resolved with SDS-PAGE and transferred onto 0.45 polyvinylidene difluoride (PVDF) membranes (Bio-Rad, USA) at 25 V for 1 h with transfer buffer (25 mM Tris base, 192 mM glycine, 20% methanol; pH 8.3) using a Trans-Blot SD semi-dry transfer cell (Bio-Rad, USA). Membranes were probed individually with primary antibody diluted 1:500 (gold standard pooled human sera) at 25 °C for 2 h. Afterward, the membranes were washed three times with Tris-buffered saline (pH 7.5) containing 0.05% (v/v) Tween 20 (TBST) for 10 min and incubated with horseradish peroxidase (HRP)-conjugated goat anti-human IgG (1:1,000 dilution) for 2 h at room temperature. The membranes were then washed with TBST, and the signal was detected with an enhanced chemiluminescence detection kit (GE Healthcare, Uppsala, Sweden). Immunoblots were imaged in a transilluminator (Uvitec, Cambridge). Alliance software v. 4.7 was used to capture several images at different exposure times, reaching ten shots with a 2 s increment. M: marker.

**Table S1.** BepiPred Linear Epitope Prediction 2.0 Results.

We used a high-throughput *in silico* prediction of protein antigenicity to compare linear B-cell epitopes between *P. brasiliensis* (Pb18) and *P. lutzii* (Pb01) immunoreactive proteins. Therefore, protein sequences were retrieved from NCBI and submitted to BepiPred [5] using the default parameters.

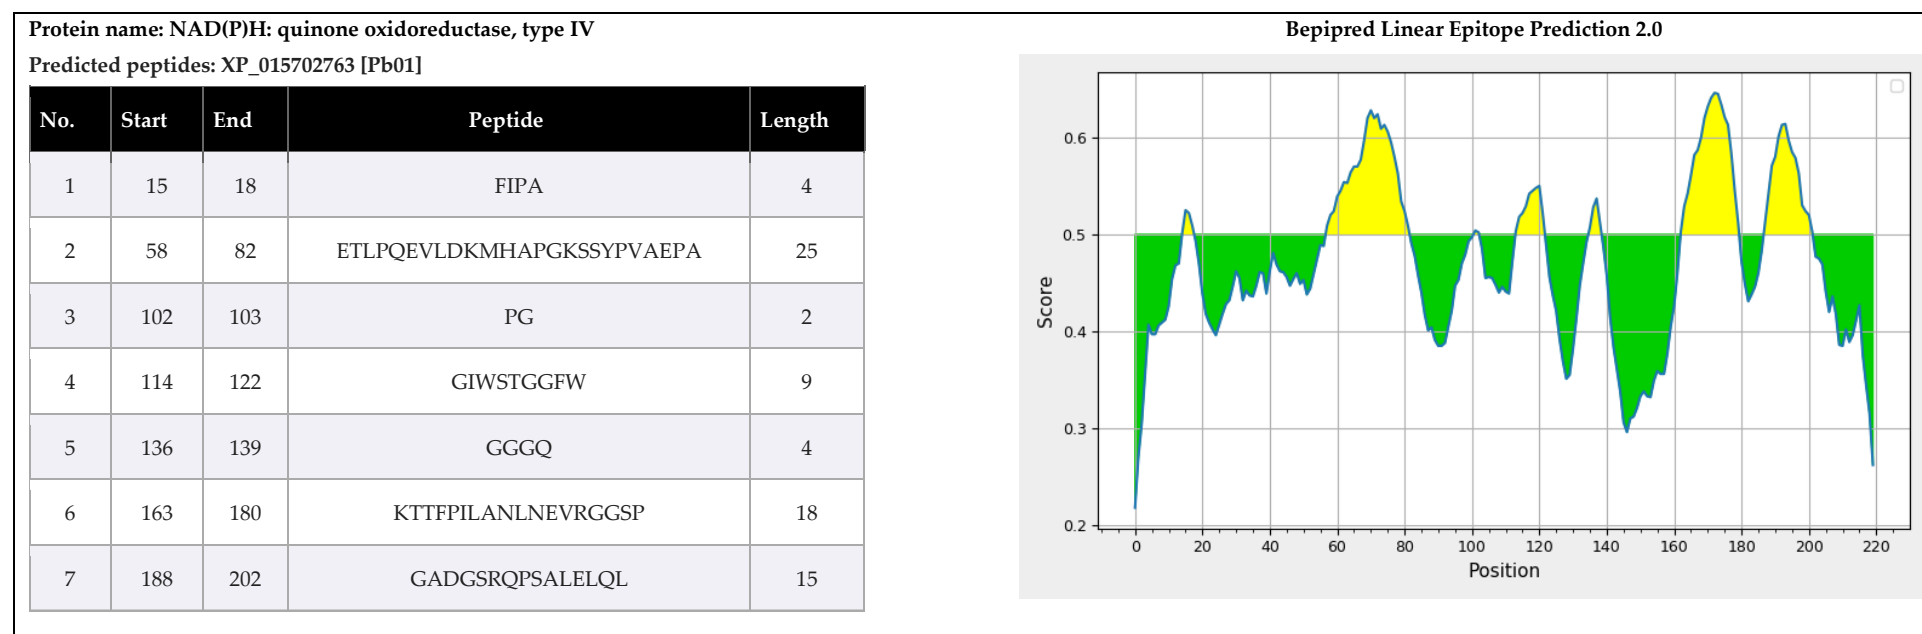

## Predicted peptides: XP\_010763025 [Pb18]

| No. | Start | End | Peptide                  | Length |
|-----|-------|-----|--------------------------|--------|
| 1   | 44    | 44  | I                        | 1      |
| 2   | 46    | 69  | ETLPQEVLDKMHAPGKSSYPVAEP | 24     |
| 3   | 105   | 110 | STGGFW                   | 6      |
| 4   | 123   | 127 | PGGGQ                    | 5      |
| 5   | 152   | 167 | TTFPILANLDEVRGGS         | 16     |
| 6   | 175   | 189 | AGADGSRQPSALELQ          | 15     |

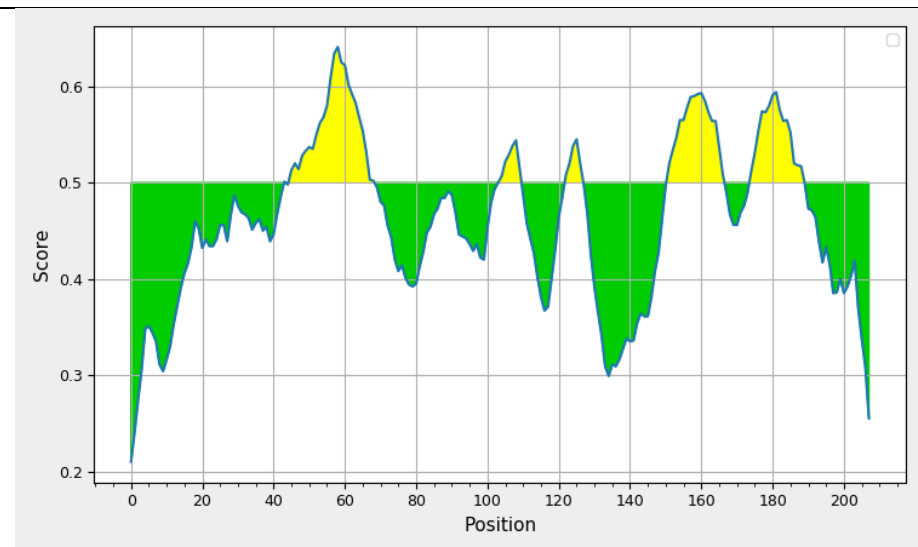

Protein name: Uncharacterized protein (Thioredoxin-like Superfamily)

Predicted peptides: XP\_015700719 [Pb01]

| No. | Start | End | Peptide                                              | Length |
|-----|-------|-----|------------------------------------------------------|--------|
| 1   | 6     | 24  | ISRLTLHDPPVYSVAKQFP                                  | 19     |
| 2   | 37    | 84  | PSNPPTLRTSQITSKTYHDSKSPI<br>RRPEALPEWRHGDQAHAGIFTPSK | 48     |
| 3   | 116   | 122 | SKNPHYR                                              | 7      |
| 4   | 134   | 138 | <b>QPWHP</b>                                         | 5      |
| 5   | 153   | 157 | LAPEK                                                | 5      |
| 6   | 169   | 186 | QTEFFDANVVNETRNETY                                   | 18     |
| 7   | 198   | 198 | V                                                    | 1      |
| 8   | 200   | 201 | EA                                                   | 2      |
| 9   | 203   | 228 | LLKMLAVSDKPDEQGLNGGNGVTGD                            | 26     |
| 10  | 230   | 230 | K                                                    | 1      |
| 11  | 233   | 239 | <b>VKASRLI</b>                                       | 7      |
| 12  | 253   | 270 | <b>EERTISSRFTAQWEKWL</b>                             | 18     |

Bepipred Linear Epitope Prediction 2.0

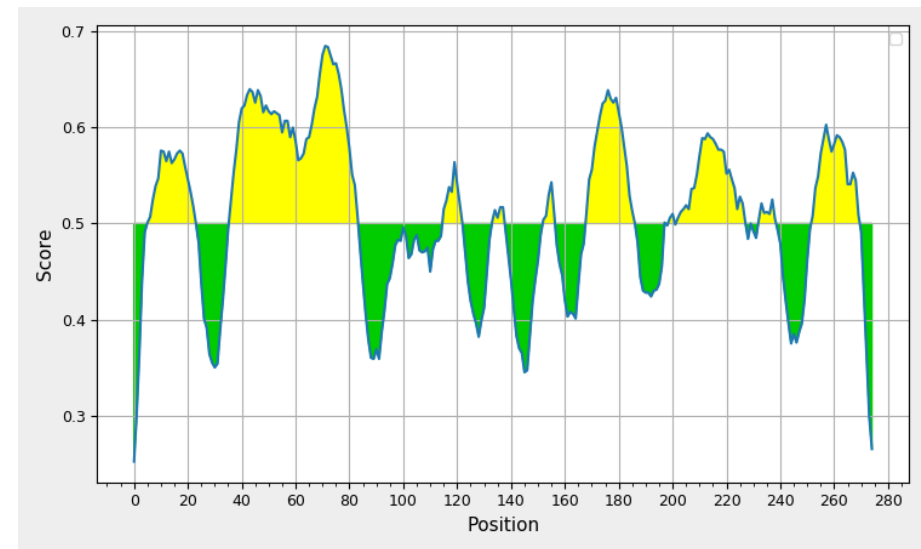

## Predicted peptides: XP\_010758121 [Pb18]

| No. | Start | End | Peptide                    | Length |
|-----|-------|-----|----------------------------|--------|
| 1   | 5     | 20  | PQFAGQKLSLSGGTET           | 16     |
| 2   | 29    | 41  | LRTQKPDTNPATS              | 13     |
| 3   | 62    | 69  | SKNAHYRD                   | 8      |
| 4   | 80    | 84  | <b>QPWHP</b>               | 5      |
| 5   | 98    | 103 | KLAPEK                     | 6      |
| 6   | 116   | 131 | TEFFDANVVNETRNET           | 16     |
| 7   | 144   | 170 | VDEAALLKMLAVSDKPDEQGLNGGNG | 27     |
| 8   | 172   | 173 | TG                         | 2      |
| 9   | 179   | 185 | <b>VKASRLI</b>             | 7      |
| 10  | 199   | 216 | <b>EERTISSRFTAQWEKWL</b>   | 18     |

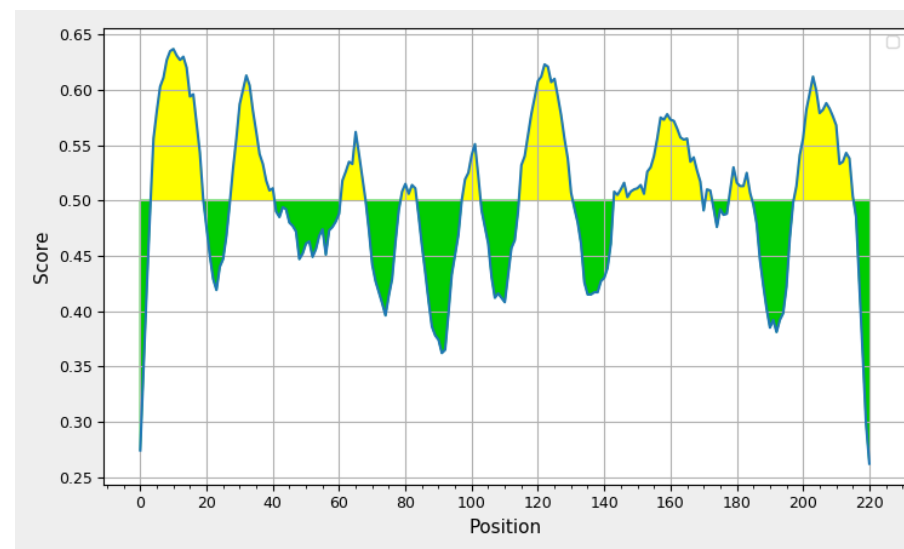



Protein name: Triosephosphate isomerase

Predicted peptides: XP\_002795879 [Pb01]

| No. | Start | End | Peptide             | Length |
|-----|-------|-----|---------------------|--------|
| 1   | 15    | 19  | <b>GTAKS</b>        | 5      |
| 2   | 31    | 33  | KLD                 | 3      |
| 3   | 69    | 72  | <b>PNGA</b>         | 4      |
| 4   | 96    | 107 | <b>ERRVLLREDDEF</b> | 12     |
| 5   | 130   | 141 | LEEREAGKTIDV        | 12     |
| 6   | 151   | 151 | <b>E</b>            | 1      |
| 7   | 155   | 156 | <b>PA</b>           | 2      |
| 8   | 172   | 183 | <b>GTGKVATTEQAQ</b> | 12     |
| 9   | 194   | 202 | <b>NEKISPEAA</b>    | 9      |
| 10  | 215   | 217 | ENN                 | 3      |
| 11  | 251   | 254 | GIPH                | 4      |

Bepipred Linear Epitope Prediction 2.0

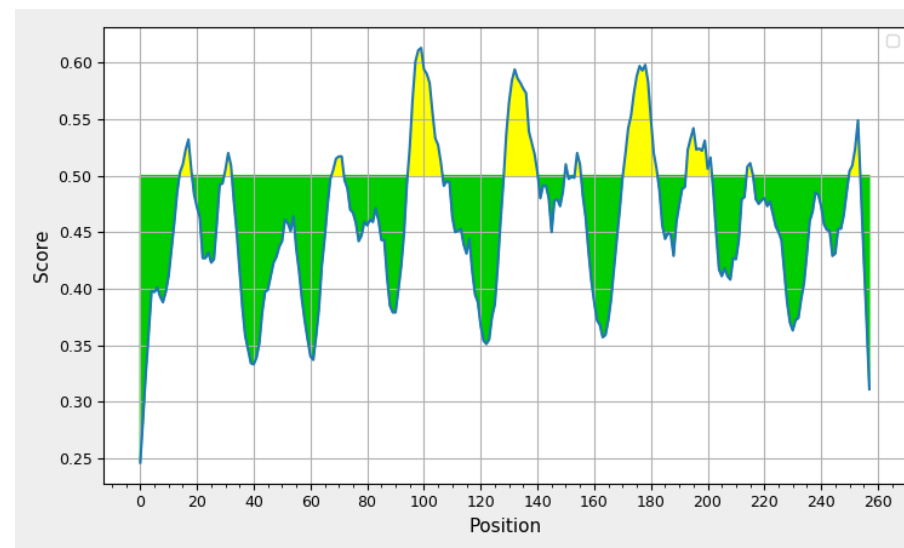

## Predicted peptides: XP\_010762134 [Pb18]

| No. | Start | End | Peptide                      | Length |
|-----|-------|-----|------------------------------|--------|
| 1   | 15    | 19  | <b>GTAKS</b>                 | 5      |
| 2   | 31    | 32  | KL                           | 2      |
| 3   | 69    | 72  | <b>PNGA</b>                  | 4      |
| 4   | 96    | 107 | <b>ERRVLLREDDEF</b>          | 12     |
| 5   | 130   | 141 | LEEREAGRTIDV                 | 12     |
| 6   | 151   | 151 | <b>E</b>                     | 1      |
| 7   | 153   | 153 | V                            | 1      |
| 8   | 155   | 156 | <b>PA</b>                    | 2      |
| 9   | 172   | 183 | <b>GTGKVATTEQAQ</b>          | 12     |
| 10  | 194   | 202 | <b>NEKISPEAA</b>             | 9      |
| 11  | 215   | 216 | ES                           | 2      |
| 12  | 239   | 240 | PA                           | 2      |
| 13  | 249   | 276 | MIGISYPANGQITNSSRSCRYHQRPFID | 28     |

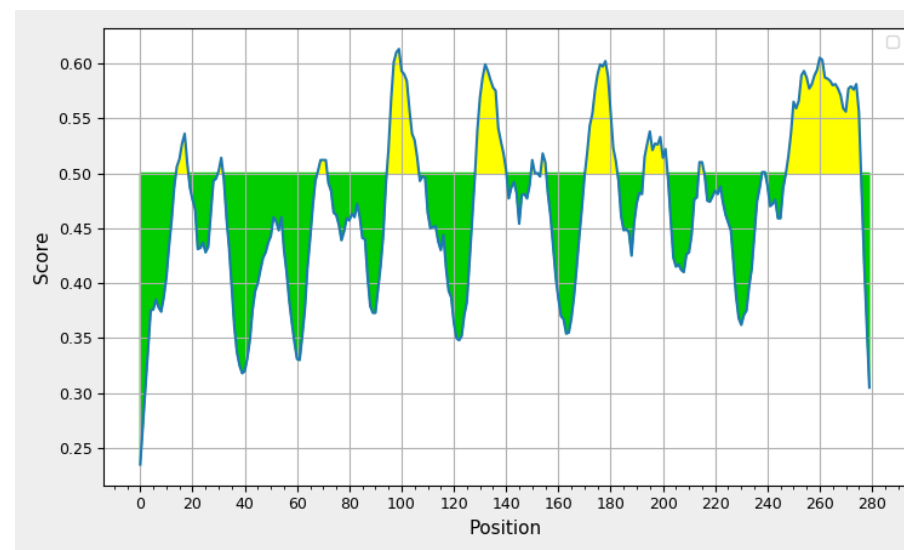

Protein name: Phenylacetone monooxygenase

Predicted peptides: XP\_002797384 [Pb01]

Bepipred Linear Epitope Prediction 2.0

| No. | Start | End | Peptide                                                         | Length |
|-----|-------|-----|-----------------------------------------------------------------|--------|
| 1   | 5     | 63  | ISNEVSFDPDVLKAKYIEERNKRIRDDG<br>IKQYQAIDTDNFKFSVEDPYTKPGFSRAPID | 59     |
| 2   | 110   | 110 | Y                                                               | 1      |
| 3   | 127   | 141 | EELNYIPTEKYARAP                                                 | 15     |
| 4   | 174   | 174 | T                                                               | 1      |
| 5   | 204   | 213 | KLPGVPGIEK                                                      | 10     |
| 6   | 224   | 241 | WDYDYTGGDTRGGLSKLA                                              | 18     |
| 7   | 281   | 323 | RLDQPTDPAWAASLKKGWQQKR<br>MDNFNIIVSGGHQDEDLVHDG                 | 43     |
| 8   | 333   | 360 | VFGGADQPTAKKEAASAMQMA<br>DFKKMEQ                                | 28     |
| 9   | 366   | 385 | DQIVKDPATAGRLKAYYNQF                                            | 20     |
| 10  | 411   | 416 | GKGIEC                                                          | 6      |
| 11  | 424   | 424 | A                                                               | 1      |
| 12  | 427   | 427 | K                                                               | 1      |
| 13  | 442   | 471 | FSTDYSKRSGVEIKGLN                                               | 30     |

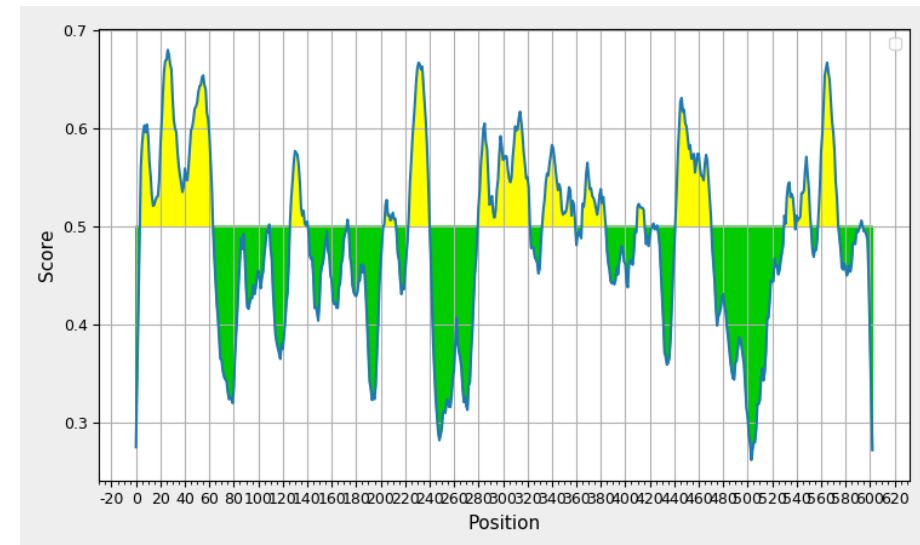

|    |     |     |                   |    |
|----|-----|-----|-------------------|----|
|    |     |     | GTTLTEKWEDGEK     |    |
| 14 | 531 | 539 | EAEQWVKT          | 9  |
| 15 | 541 | 552 | MEGGKLQQNFVK      | 12 |
| 16 | 559 | 575 | YNQEQQITERALRNSNY | 17 |
| 17 | 593 | 595 | GKL               | 3  |

**Predicted peptides: XP\_010759514 [Pb18]**

| No. | Start | End | Peptide                                                          | Length |
|-----|-------|-----|------------------------------------------------------------------|--------|
| 1   | 5     | 64  | TSNEVTFDPDVLKAKYLEERNKRLRDDGI<br>KQYQAIETGNLKYSVEDPYTKPGFSRASIDE | 60     |
| 2   | 108   | 110 | NRY                                                              | 3      |
| 3   | 127   | 142 | EELNYIPTEKYARAPE                                                 | 16     |
| 4   | 171   | 174 | WDET                                                             | 4      |
| 5   | 203   | 208 | PKLPGV                                                           | 6      |
| 6   | 224   | 241 | WDYDYTGDDTTGGLSKLA                                               | 18     |
| 7   | 277   | 323 | SVDIRLDQPTDPAWAASLQKGWQQ<br>KRMDNFNIIVSGGHQDEDLVQDG              | 47     |
| 8   | 334   | 349 | YGGRDQPTAKKEAASA                                                 | 16     |
| 9   | 351   | 360 | QMADFKKMEQ                                                       | 10     |
| 10  | 367   | 385 | QIVKDPATAARLKAYYNQF                                              | 19     |

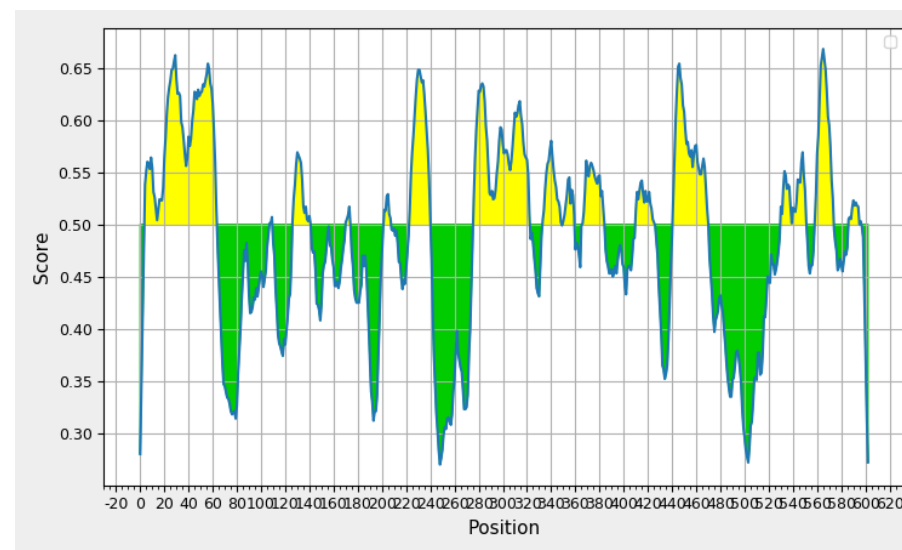

|    |     |     |                               |    |
|----|-----|-----|-------------------------------|----|
| 11 | 411 | 426 | GKGIERITENGIVANG              | 16 |
| 12 | 442 | 470 | FSTDYSKRSGIEIRGLNGTTLTEKWEDGE | 29 |
| 13 | 531 | 552 | EAEQQWVEAIMEGGKLOQNFVK        | 22 |
| 14 | 559 | 574 | YNQEGQITERALRNSN              | 16 |
| 15 | 587 | 595 | KDWREAGKL                     | 9  |
| 16 | 597 | 597 | G                             | 1  |

Protein name: Uncharacterized Protein (PRTases type I Superfamily)

Predicted peptides: XP\_015701261 [Pb01]

| No. | Start | End | Peptide                                  | Length |
|-----|-------|-----|------------------------------------------|--------|
| 1   | 54    | 55  | DG                                       | 2      |
| 2   | 69    | 103 | ENLGRDDDDPVEQLGTKVTRTQWLDLSSLEM<br>ANLIG | 35     |
| 3   | 128   | 144 | KDVQVAQQQLGREGEKT                        | 17     |
| 4   | 153   | 170 | NKDKPKKGKLPADMLESG                       | 18     |
| 5   | 189   | 201 | <b>AKDIDQHDQLAAE</b>                     | 13     |

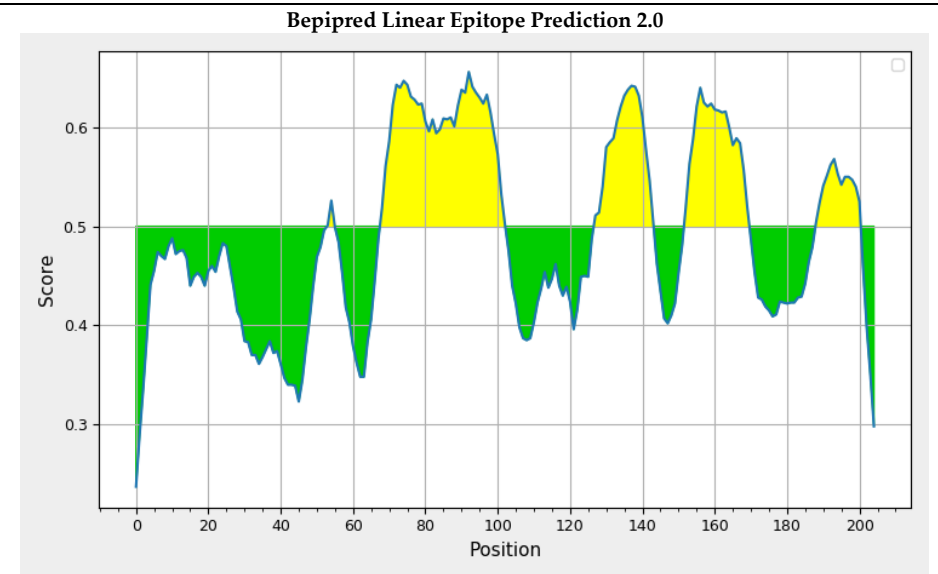

## Predicted peptides: XP\_010756299 [Pb18]

| No. | Start | End | Peptide                                | Length |
|-----|-------|-----|----------------------------------------|--------|
| 1   | 53    | 56  | PDGA                                   | 4      |
| 2   | 69    | 102 | ENLGRDDDPVEQLGTKVTRTQWLDLSSLEM<br>ANLI | 34     |
| 3   | 129   | 143 | DVQVAQQQLGREGEK                        | 15     |
| 4   | 153   | 170 | NKDKLKKGKLPADMLESG                     | 18     |
| 5   | 189   | 201 | <b>AKDIDQHDQLAAE</b>                   | 13     |

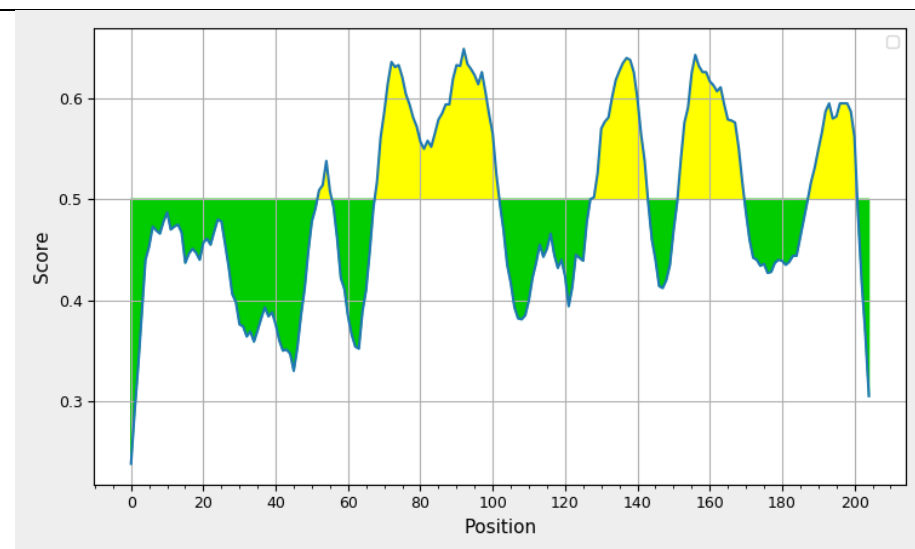

Protein name: Proteasome subunit alpha

Predicted peptides: XP\_002797532 [Pb01]

| No. | Start | End | Peptide                       | Length |
|-----|-------|-----|-------------------------------|--------|
| 1   | 5     | 7   | <b>YSF</b>                    | 3      |
| 2   | 29    | 30  | NQ                            | 2      |
| 3   | 50    | 62  | KSSSPLIEPPSL                  | 13     |
| 4   | 96    | 105 | AYKRIYNEYP                    | 10     |
| 5   | 122   | 127 | TQSGGV                        | 6      |
| 6   | 142   | 170 | GVKPIPAEGELDTNKKKASGKTGGILKGG | 29     |
| 7   | 202   | 212 | EKRYTEGLELE                   | 11     |
| 8   | 227   | 233 | <b>EGEMNGE</b>                | 7      |
| 9   | 246   | 272 | HLLGYEGVEGARGPRFRKLSKEEIEDY   | 27     |

Bepred Linear Epitope Prediction 2.0

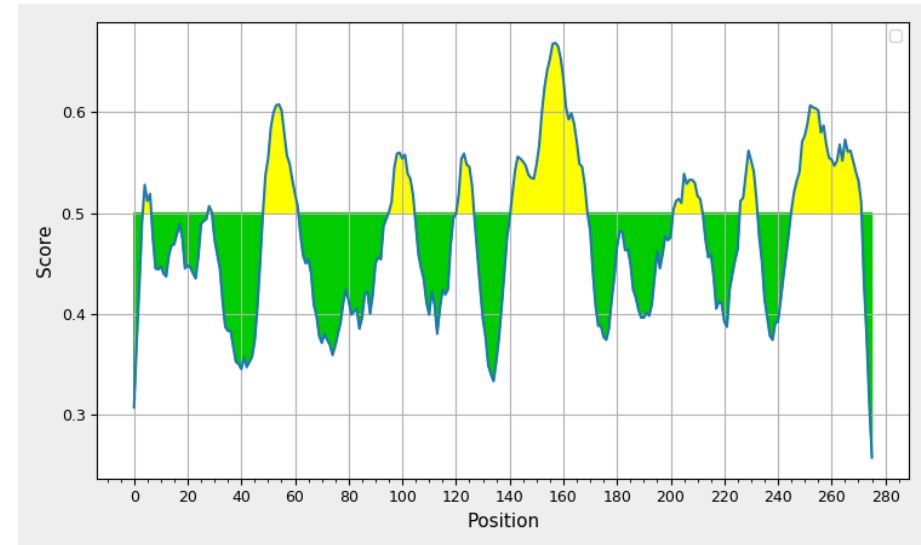



## Predicted peptides: XP\_010762451 [Pb18]

| No. | Start | End | Peptide                       | Length |
|-----|-------|-----|-------------------------------|--------|
| 1   | 5     | 7   | <b>YSF</b>                    | 3      |
| 2   | 49    | 59  | KSSSPLIDPPS                   | 11     |
| 3   | 96    | 104 | YKRIYNEYP                     | 9      |
| 4   | 120   | 126 | ATQSGGV                       | 7      |
| 5   | 141   | 169 | GVEPTPVEGELDRNKKKASGKTGGILKGG | 29     |
| 6   | 181   | 182 | YF                            | 2      |
| 7   | 202   | 212 | KRYTEGLELED                   | 11     |
| 8   | 226   | 232 | <b>EGEMNGE</b>                | 7      |
| 9   | 245   | 270 | HLLGYEGVEGARGPRFRKLSKEEIED    | 26     |

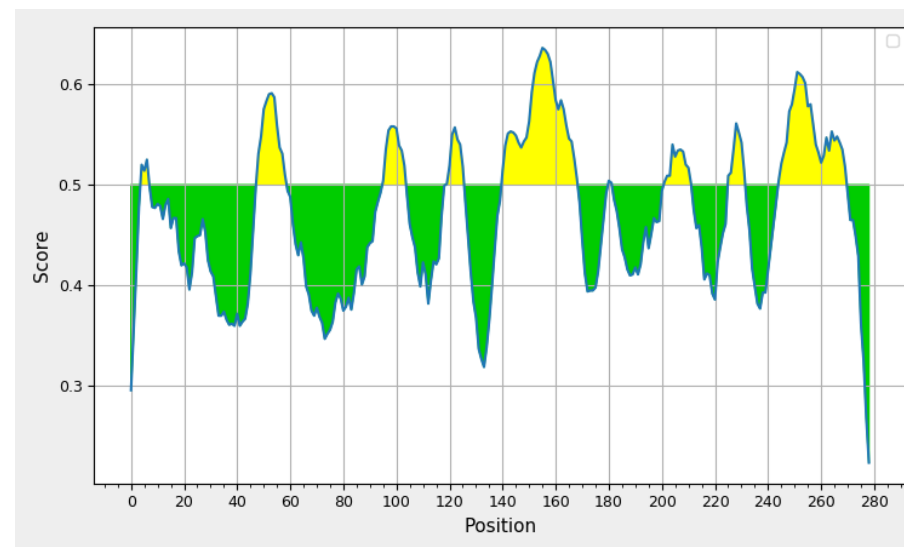

Protein name: Glyceraldehyde-3-Phosphate dehydrogenase

Predicted peptides: Q8X1X3

| No. | Start | End | Peptide            | Length |
|-----|-------|-----|--------------------|--------|
| 1   | 36    | 38  | <b>FIE</b>         | 3      |
| 2   | 51    | 60  | THGQFKGDIQ         | 10     |
| 3   | 62    | 62  | S                  | 1      |
| 4   | 80    | 89  | RDPANIPWGK         | 10     |
| 5   | 105   | 111 | TEKAKAH            | 7      |
| 6   | 139   | 142 | <b>SYRP</b>        | 4      |
| 7   | 185   | 202 | QKTVDGPSHKDWRGGRTA | 18     |
| 8   | 253   | 256 | VTYD               | 4      |
| 9   | 267   | 268 | <b>EG</b>          | 2      |
| 10  | 281   | 283 | <b>LVS</b>         | 3      |
| 11  | 287   | 288 | <b>NG</b>          | 2      |

Bepred Linear Epitope Prediction 2.0

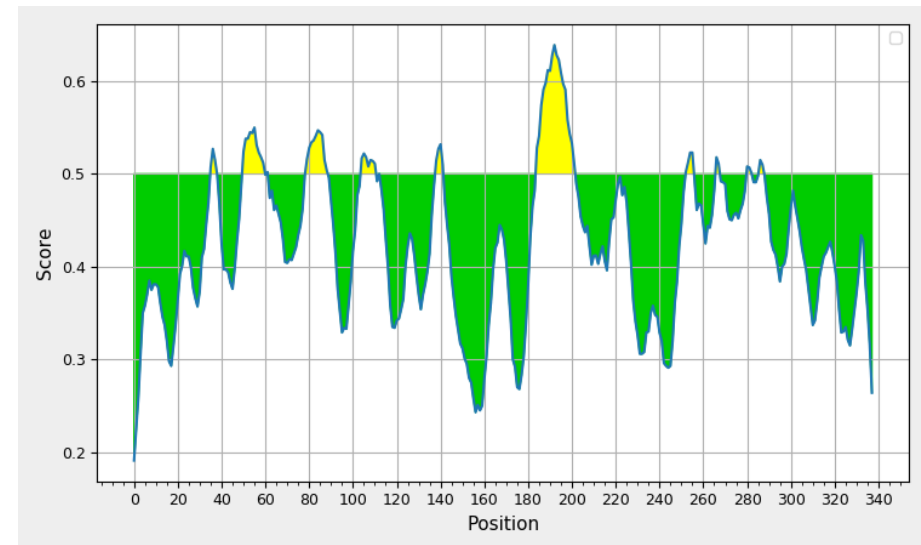

## Predicted peptides: XP\_010758444 [Pb18]

| No. | Start | End | Peptide        | Length |
|-----|-------|-----|----------------|--------|
| 1   | 36    | 38  | <b>FIE</b>     | 3      |
| 2   | 51    | 58  | THGQFKGD       | 8      |
| 3   | 79    | 87  | ERDPTNIPW      | 9      |
| 4   | 103   | 111 | TTTEKAKAH      | 9      |
| 5   | 139   | 142 | <b>SYRP</b>    | 4      |
| 6   | 185   | 198 | QKTVDGPSHKDWRG | 14     |
| 7   | 223   | 223 | A              | 1      |
| 8   | 225   | 225 | N              | 1      |
| 9   | 254   | 256 | TYD            | 3      |
| 10  | 267   | 268 | <b>EG</b>      | 2      |
| 11  | 281   | 283 | <b>LVS</b>     | 3      |
| 12  | 287   | 288 | <b>NG</b>      | 2      |

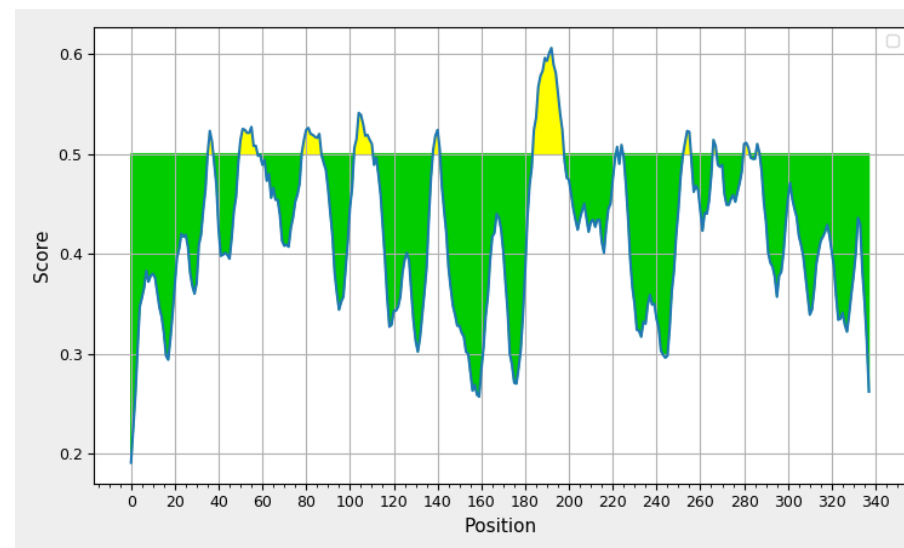

Protein name: Fructose-bisphosphate aldolase 1

Predicted peptides: XP\_002796107 [Pb01]

| No. | Start | End | Peptide                               | Length |
|-----|-------|-----|---------------------------------------|--------|
| 1   | 4     | 11  | KDILSRKT                              | 8      |
| 2   | 69    | 82  | FFAGKGVPNGKQEA                        | 14     |
| 3   | 113   | 129 | AKKLLPWLDGMLDADEC                     | 17     |
| 4   | 149   | 157 | <b>ESVEWNIET</b>                      | 9      |
| 5   | 180   | 202 | <b>GGEEDGVNNEVDNNSLYTQPED</b>         | 23     |
| 6   | 212   | 212 | <b>A</b>                              | 1      |
| 7   | 229   | 240 | VYKPGNVR LHPE                         | 12     |
| 8   | 247   | 259 | AYVKEKTGSSKNK                         | 13     |
| 9   | 272   | 279 | <b>TKAEFKEA</b>                       | 8      |
| 10  | 306   | 333 | <b>LKKKDYLM S AVGNPEGEDKPNKKYFDPR</b> | 28     |
| 11  | 352   | 357 | <b>DDFNTS</b>                         | 6      |

Bepipred Linear Epitope Prediction 2.0

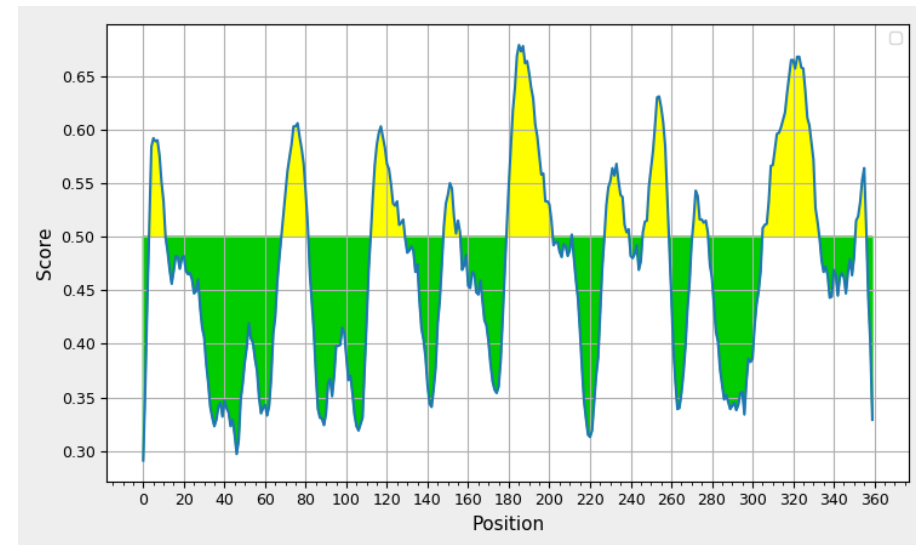

## Predicted peptides: XP\_010756450 [Pb18]

| No. | Start | End | Peptide                       | Length |
|-----|-------|-----|-------------------------------|--------|
| 1   | 5     | 12  | DILSRKTG                      | 8      |
| 2   | 70    | 83  | FAGKGVPNGNQEAS                | 14     |
| 3   | 113   | 130 | AKKLLPWL DGM L DADERY         | 18     |
| 4   | 133   | 133 | L                             | 1      |
| 5   | 149   | 157 | ESVEWNIET                     | 9      |
| 6   | 180   | 202 | GG EEDGVN NESVDNNSLYTQPED     | 23     |
| 7   | 208   | 208 | K                             | 1      |
| 8   | 212   | 212 | A                             | 1      |
| 9   | 229   | 238 | VYKPGNVRLH                    | 10     |
| 10  | 248   | 259 | HVKEKTGSSKNK                  | 12     |
| 11  | 272   | 279 | TKAEFKEA                      | 8      |
| 12  | 306   | 333 | LKKKDY LMSAVGNPEGEDKPNKKYFDPR | 28     |
| 13  | 352   | 357 | DDFN TS                       | 6      |

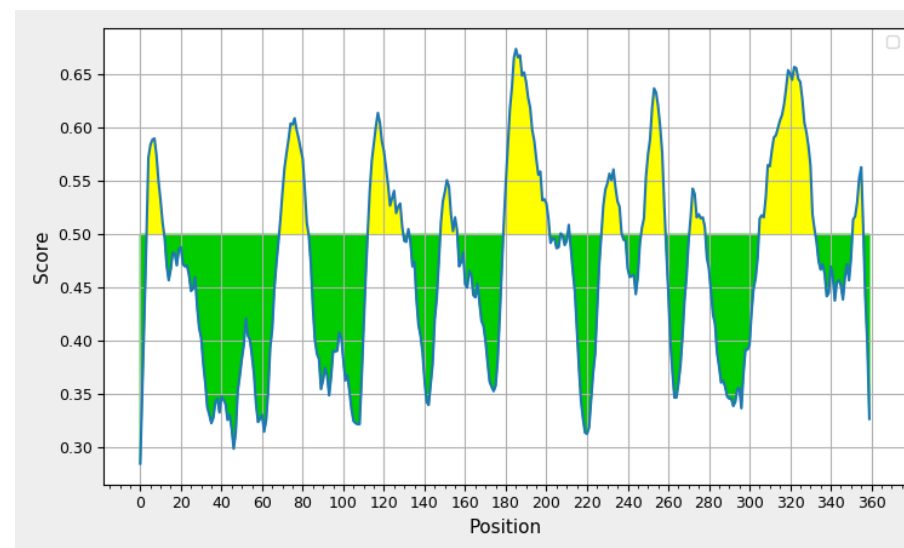

Protein name: Mannitol-1-Phosphate 5-dehydrogenase

Predicted peptides: XP\_002791734 [Pb01]

Bepipred Linear Epitope Prediction 2.0

| No. | Start | End | Peptide                   | Length |
|-----|-------|-----|---------------------------|--------|
| 1   | 57    | 60  | GEHK                      | 4      |
| 2   | 73    | 80  | <b>HNLDDVIK</b>           | 8      |
| 3   | 129   | 130 | TD                        | 2      |
| 4   | 141   | 147 | DESRDSD                   | 7      |
| 5   | 165   | 172 | TQDPNSGL                  | 8      |
| 6   | 188   | 211 | PFGDVGHDPDIKAIHWVDNLEPYIE | 24     |
| 7   | 260   | 277 | IVEKHHIPAEEQHDYVQK        | 18     |
| 8   | 280   | 289 | TRISNPYLED                | 10     |
| 9   | 299   | 306 | LRKLSRKE                  | 8      |
| 10  | 320   | 320 | Q                         | 1      |
| 11  | 339   | 356 | PDDEESFELHKILKELSA        | 18     |
| 12  | 364   | 371 | TDLEPDHP                  | 8      |
| 13  | 373   | 375 | YPR                       | 3      |
| 14  | 378   | 378 | <b>E</b>                  | 1      |

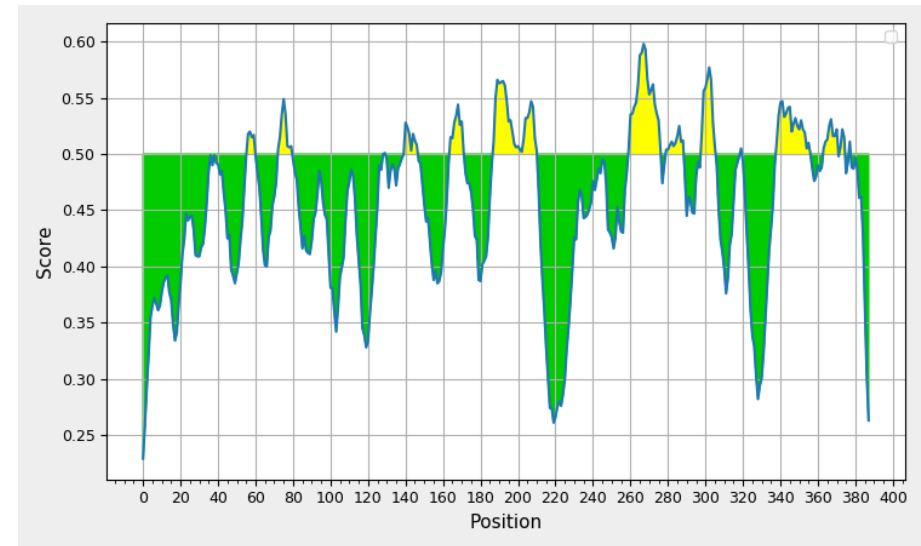

## Predicted peptides: XP\_010757428 [Pb18]

| No. | Start | End | Peptide            | Length |
|-----|-------|-----|--------------------|--------|
| 1   | 37    | 43  | SVIDALQ            | 7      |
| 2   | 56    | 61  | EGEHKK             | 6      |
| 3   | 73    | 80  | <b>HNLDDVIK</b>    | 8      |
| 4   | 141   | 143 | DES                | 3      |
| 5   | 145   | 146 | RD                 | 2      |
| 6   | 164   | 172 | PTQDPNSGL          | 9      |
| 7   | 189   | 201 | FGDVGHPDIKAIH      | 13     |
| 8   | 204   | 211 | DNLEPYIE           | 8      |
| 9   | 260   | 277 | IVEKHHIPAAEQHDYVQK | 18     |
| 10  | 280   | 290 | TRISNPYLEDV        | 11     |
| 11  | 296   | 306 | RAPLRKLSRKE        | 11     |
| 12  | 339   | 357 | PDDEESFELHKILKELSA | 19     |
| 13  | 361   | 361 | T                  | 1      |
| 14  | 363   | 371 | LTDLEADHP          | 9      |
| 15  | 378   | 378 | <b>E</b>           | 1      |
| 16  | 382   | 382 | K                  | 1      |

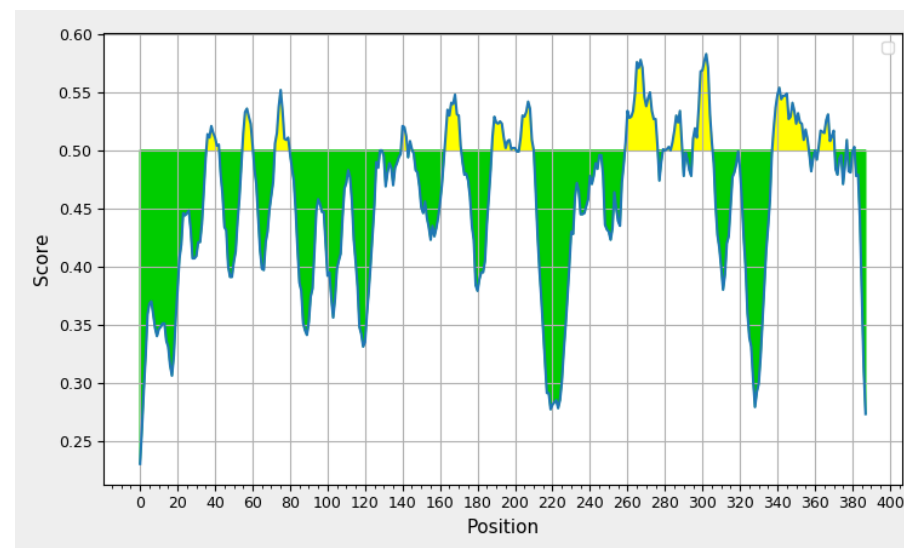

Protein name: Hsp72-like protein

Predicted peptides: XP\_002790117 [Pb01]

| No. | Start | End | Peptide                | Length |
|-----|-------|-----|------------------------|--------|
| 1   | 29    | 32  | <b>NDQG</b>            | 4      |
| 2   | 58    | 58  | A                      | 1      |
| 3   | 73    | 94  | GRKFADPEVQSDMKHFPFKVID | 22     |
| 4   | 131   | 131 | S                      | 1      |
| 5   | 134   | 134 | <b>G</b>               | 1      |
| 6   | 149   | 151 | <b>NDS</b>             | 3      |
| 7   | 186   | 190 | <b>KAEGE</b>           | 5      |
| 8   | 244   | 257 | <b>KRKHKKDLSSNARA</b>  | 14     |
| 9   | 270   | 275 | RTLSSA                 | 6      |
| 10  | 323   | 327 | KIDKS                  | 5      |
| 11  | 349   | 362 | SDFNKGEPNKSIN          | 14     |
| 12  | 380   | 390 | GDTTSKSTNEI            | 11     |
| 13  | 400   | 407 | VGIETAGG               | 8      |
| 14  | 413   | 424 | IKRNTTIPTKKS           | 12     |
| 15  | 442   | 454 | FEGERARTKDNNL          | 13     |
| 16  | 463   | 471 | IPPAPRGVP              | 9      |

Bepred Linear Epitope Prediction 2.0

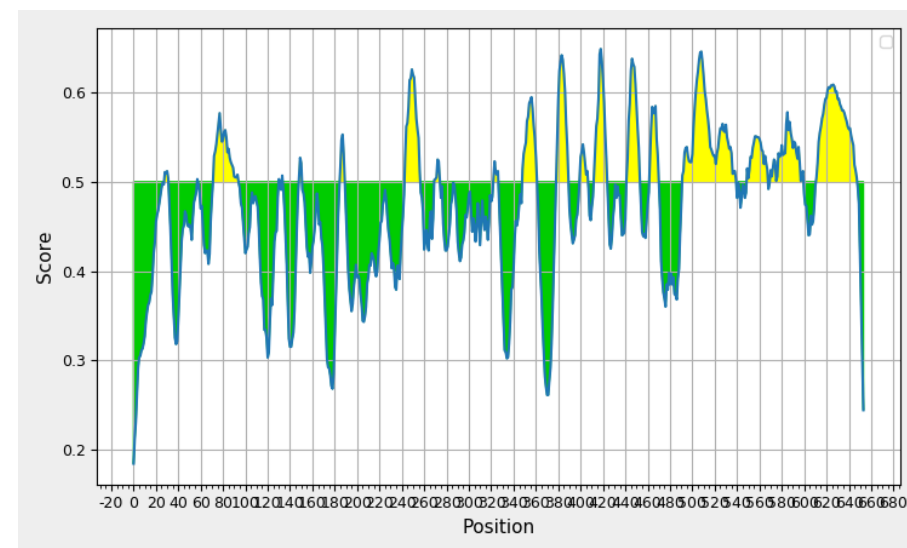



|    |     |     |                                                       |    |
|----|-----|-----|-------------------------------------------------------|----|
| 17 | 492 | 540 | KGTGKTNKIVITNDKGRLSKEEIERMLAE<br>AEKYKAEDEAEASRISAKNG | 49 |
| 18 | 550 | 568 | NTISDSKVDEKLDASDKEK                                   | 19 |
| 19 | 571 | 600 | TEIDKTVSWLDENQTATKEEFEAQQKELES                        | 30 |
| 20 | 612 | 648 | AGGEGGAPGAGFPGAGGPGGFPGA<br>GAGGAHSGGDDGP             | 37 |

Predicted peptides: XP\_010763478 [Pb18]

| No. | Start | End | Peptide                 | Length |
|-----|-------|-----|-------------------------|--------|
| 1   | 27    | 27  | I                       | 1      |
| 2   | 29    | 32  | NDQG                    | 4      |
| 3   | 58    | 59  | AM                      | 2      |
| 4   | 74    | 96  | RKFADPEVQSDMKHFPFKVIDKA | 23     |
| 5   | 134   | 134 | G                       | 1      |
| 6   | 149   | 151 | NDS                     | 3      |
| 7   | 186   | 190 | KAEGE                   | 5      |
| 8   | 244   | 257 | KRKHKKDLSSNARA          | 14     |
| 9   | 270   | 274 | RTLSS                   | 5      |
| 10  | 324   | 327 | IDKS                    | 4      |
| 11  | 349   | 361 | SDFFNGKEPNKSI           | 13     |

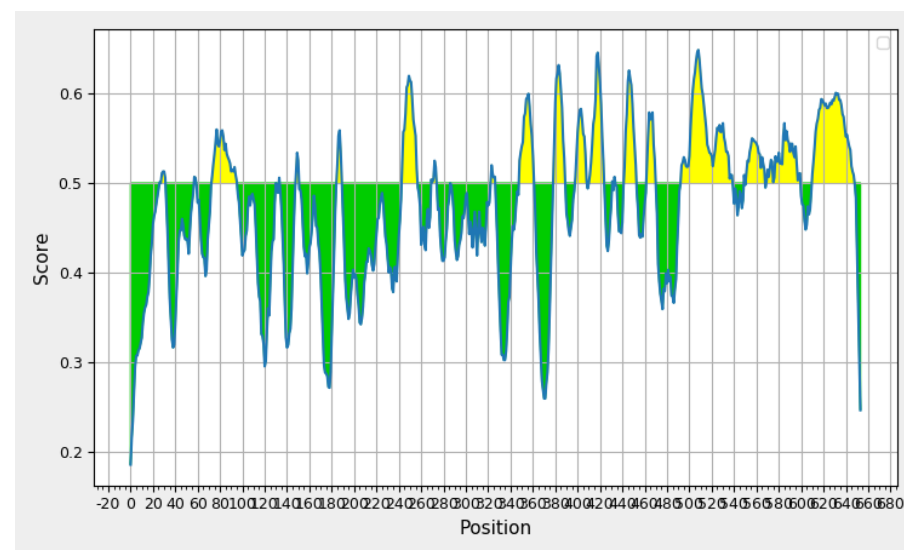

|    |     |     |                                                    |    |
|----|-----|-----|----------------------------------------------------|----|
| 12 | 380 | 389 | GDTTSKSTNE                                         | 10 |
| 13 | 399 | 409 | SVGIETAGGVM                                        | 11 |
| 14 | 411 | 424 | PLIKRNTTIPTKKS                                     | 14 |
| 15 | 432 | 432 | D                                                  | 1  |
| 16 | 434 | 434 | Q                                                  | 1  |
| 17 | 443 | 453 | EGERARTKDNN                                        | 11 |
| 18 | 463 | 470 | IPPAPRGV                                           | 8  |
| 19 | 494 | 539 | TGKTNKIVITNDKGRLSKEEIERML<br>AEAKEYKAEDEAEASRISAKN | 46 |
| 20 | 550 | 550 | N                                                  | 1  |
| 21 | 552 | 568 | ISDSKVDEKLDASDKEK                                  | 17 |
| 22 | 570 | 600 | KTEIDKTVSWLDENQTATKEEFEAQQKELES                    | 31 |
| 23 | 611 | 648 | GAGGEGGAPGAGFPGAGGPG<br>GFPGAGASGAHSGDDGP          | 38 |

Protein name: Citrate synthase

Predicted peptides: XP\_002793640 [Pb01]

| No. | Start | End | Peptide               | Length |
|-----|-------|-----|-----------------------|--------|
| 1   | 6     | 10  | RATRQ                 | 5      |
| 2   | 24    | 38  | SSRFYSTAESDLKTV       | 15     |
| 3   | 40    | 59  | EKAIPAKKELFQEVKKRGED  | 20     |
| 4   | 73    | 73  | M                     | 1      |
| 5   | 107   | 113 | <b>PKGTSGT</b>        | 7      |
| 6   | 129   | 137 | <b>VPTTPQVRA</b>      | 9      |
| 7   | 140   | 140 | S                     | 1      |
| 8   | 143   | 150 | AQKSHLPK              | 8      |
| 9   | 160   | 161 | <b>PK</b>             | 2      |
| 10  | 181   | 199 | KFAKAYADGLSKASYWEPT   | 19     |
| 11  | 222   | 234 | <b>EIEKVGTTQELDPT</b> | 13     |
| 12  | 249   | 253 | SKANE                 | 5      |
| 13  | 304   | 307 | LHGL                  | 4      |
| 14  | 322   | 331 | TIGNKFTDAD            | 10     |
| 15  | 344   | 359 | QVVPGYGHGVLRLKPDP     | 16     |

Bepipred Linear Epitope Prediction 2.0

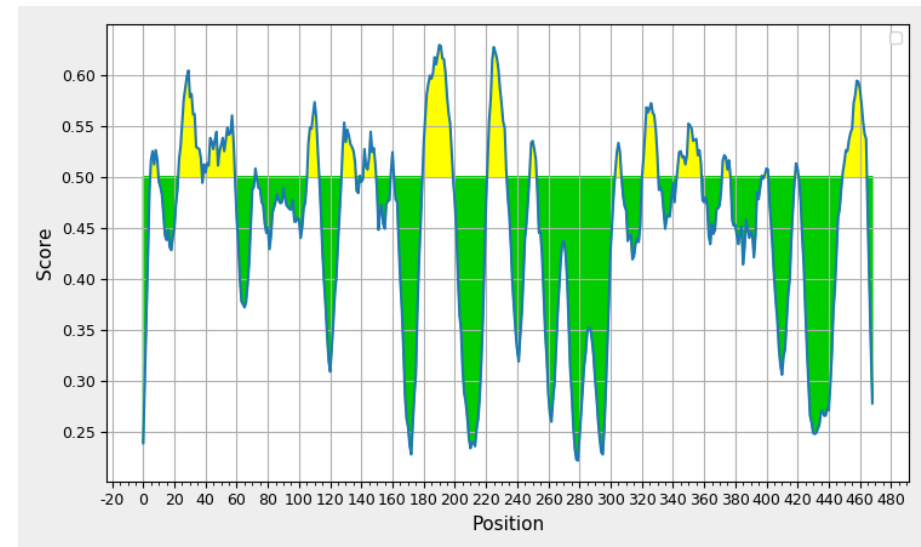

|    |     |     |                          |    |
|----|-----|-----|--------------------------|----|
| 16 | 373 | 377 | <b>EIQAN</b>             | 5  |
| 17 | 398 | 398 | <b>G</b>                 | 1  |
| 18 | 400 | 402 | TKN                      | 3  |
| 19 | 420 | 421 | FR                       | 2  |
| 20 | 450 | 465 | <b>LPIERP KSVNLQGLLD</b> | 16 |

Predicted peptides: XP\_010760342 [Pb18]

| No. | Start | End | Peptide                                                    | Length |
|-----|-------|-----|------------------------------------------------------------|--------|
| 1   | 6     | 59  | RATRQALKASQSAAWSFSSSRFYSTAESDL<br>KTVFEKAIPAKKELFQEVKKRGED | 54     |
| 2   | 73    | 74  | MR                                                         | 2      |
| 3   | 107   | 113 | <b>PKGTSGT</b>                                             | 7      |
| 4   | 129   | 137 | <b>VPTTPQVRA</b>                                           | 9      |
| 5   | 143   | 150 | AQKSHLPR                                                   | 8      |
| 6   | 160   | 161 | <b>PK</b>                                                  | 2      |
| 7   | 181   | 200 | KFAKAYADGLSKASYWEPTF                                       | 20     |
| 8   | 222   | 234 | <b>EIEKVG TQELDPT</b>                                      | 13     |
| 9   | 249   | 253 | SKVNE                                                      | 5      |
| 10  | 304   | 308 | LHGLA                                                      | 5      |
| 11  | 321   | 331 | STIGNKFTDAD                                                | 11     |

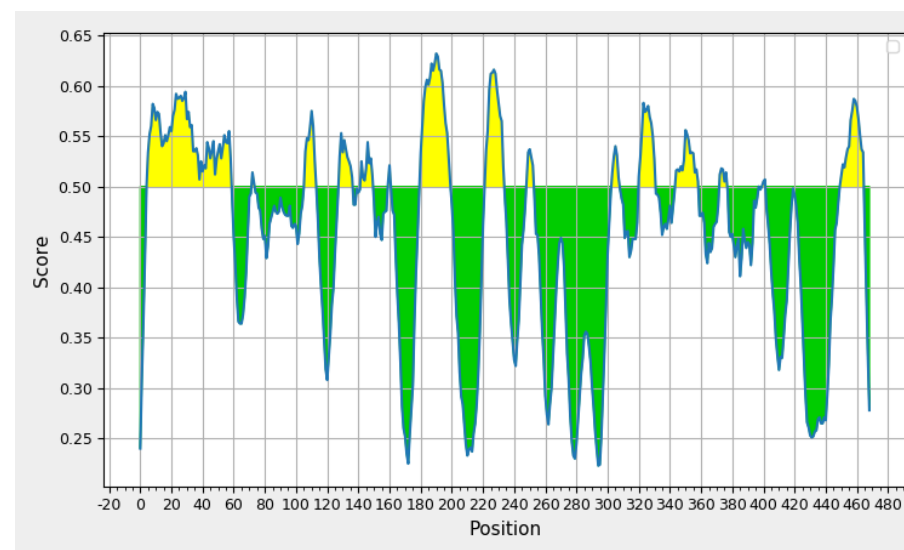

|    |     |     |                         |    |
|----|-----|-----|-------------------------|----|
| 12 | 345 | 359 | VVPGYGHGVL RKPDP        | 15 |
| 13 | 373 | 377 | <b>EIQAN</b>            | 5  |
| 14 | 398 | 398 | <b>G</b>                | 1  |
| 15 | 401 | 402 | KN                      | 2  |
| 16 | 450 | 465 | <b>LPIERP KSVNLQGLD</b> | 16 |

Protein name: Isocitrate lyase

Predicted peptides: XP\_002791040 [Pb01]

Bepipred Linear Epitope Prediction 2.0

| No. | Start | End | Peptide                                                                                | Length |
|-----|-------|-----|----------------------------------------------------------------------------------------|--------|
| 1   | 5     | 62  | <b>EQEDQKYWAEVQAVKEWWQ</b><br><b>DSRWRYTKRPFTAQIVAK</b><br><b>RGNLKIEYPSNVQSKKLWGI</b> | 58     |
| 2   | 64    | 69  | <b>EERFKN</b>                                                                          | 6      |
| 3   | 109   | 122 | DESPDLADYPMNT                                                                          | 14     |
| 4   | 138   | 160 | DRKQREERLRAPKSQRASLPNID                                                                | 23     |
| 5   | 201   | 216 | PGTKKCGHMAGKVLVP                                                                       | 16     |
| 6   | 251   | 255 | <b>LITST</b>                                                                           | 5      |
| 7   | 273   | 273 | K                                                                                      | 1      |
| 8   | 277   | 277 | D                                                                                      | 1      |
| 9   | 283   | 290 | EQAGKNGA                                                                               | 8      |
| 10  | 297   | 305 | DKWNAEAGL                                                                              | 9      |
| 11  | 319   | 323 | SSIPN                                                                                  | 5      |
| 12  | 340   | 370 | NTEARAIAKKITGSDIYFDWDAARTREGFYR                                                        | 31     |
| 13  | 398   | 403 | LPDYAQ                                                                                 | 6      |

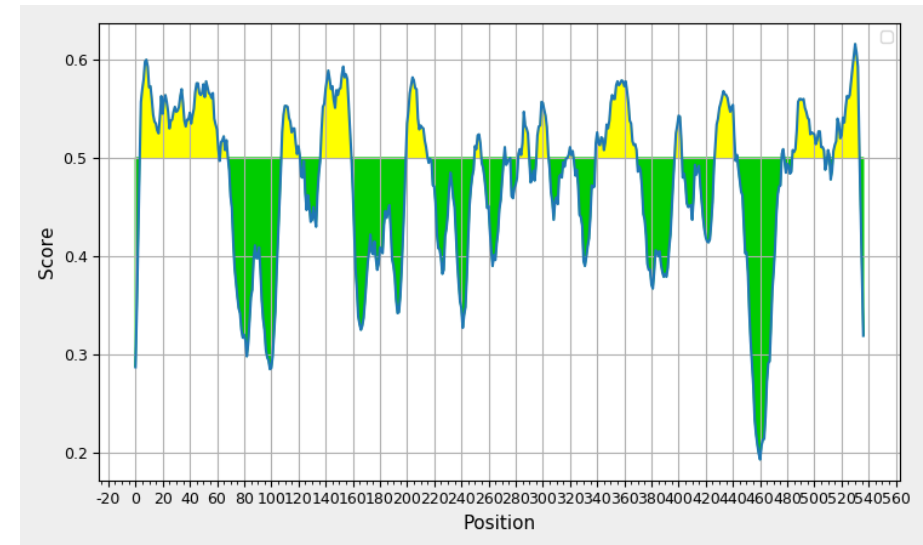

|    |     |     |                           |    |
|----|-----|-----|---------------------------|----|
| 14 | 428 | 442 | FNWKAAMPRGEQETY           | 15 |
| 15 | 444 | 444 | <b>R</b>                  | 1  |
| 16 | 477 | 478 | MN                        | 2  |
| 17 | 485 | 508 | ELVQEPPEMENGVDVVTHQKWSGAN | 24 |
| 18 | 511 | 512 | DE                        | 2  |
| 19 | 515 | 534 | KMVSGGISSTSAMGKGVTED      | 20 |

Predicted peptides: XP\_010757468 [Pb18]

| No. | Start | End | Peptide                                                                               | Length |
|-----|-------|-----|---------------------------------------------------------------------------------------|--------|
| 1   | 5     | 62  | <b>EQEDQKYWAEVQAVKEWQD</b><br><b>SRWRYTKRPFTAQIVAKR</b><br><b>GNLKIEYPSNVQSKKLWGI</b> | 58     |
| 2   | 64    | 69  | <b>EERFKN</b>                                                                         | 6      |
| 3   | 109   | 121 | DEPSPDLADYPMN                                                                         | 13     |
| 4   | 137   | 160 | HDRKQREERLRAPKSQRASLPNID                                                              | 24     |
| 5   | 200   | 216 | APGTTKCCGHMAGKVLVP                                                                    | 17     |
| 6   | 218   | 219 | SE                                                                                    | 2      |
| 7   | 251   | 255 | <b>LITST</b>                                                                          | 5      |
| 8   | 270   | 273 | PNIK                                                                                  | 4      |
| 9   | 286   | 290 | GKNGA                                                                                 | 5      |

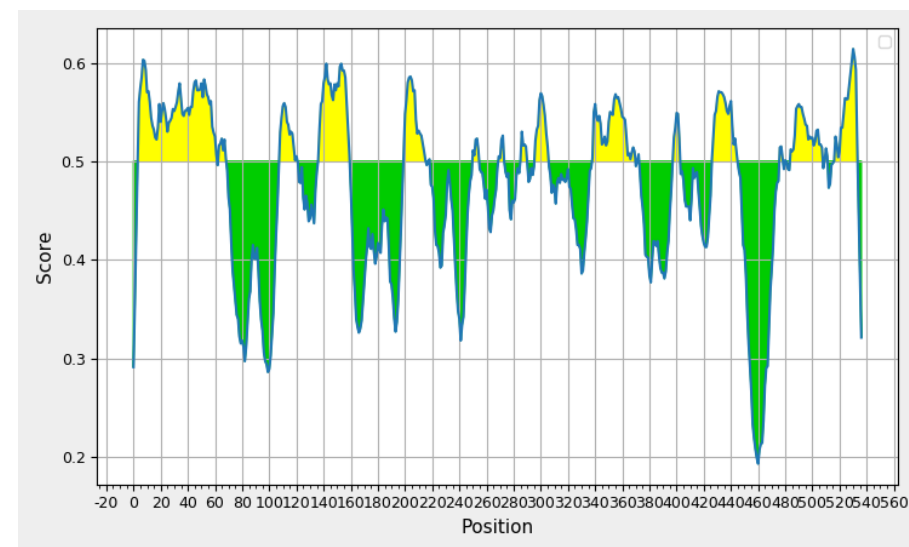

|    |     |     |                                      |    |
|----|-----|-----|--------------------------------------|----|
| 10 | 297 | 306 | DKWNAEAGLK                           | 10 |
| 11 | 339 | 370 | SNTEARAIAKKITASDTYFDW<br>DAARTREGFYR | 32 |
| 12 | 373 | 373 | G                                    | 1  |
| 13 | 399 | 403 | PDYAQ                                | 5  |
| 14 | 427 | 445 | SFNWKAAMPREQETYIRR                   | 19 |
| 15 | 477 | 479 | TNG                                  | 3  |
| 16 | 481 | 481 | R                                    | 1  |
| 17 | 485 | 508 | ELVQPEMENGIDVVTHQKWSGAN              | 24 |
| 18 | 510 | 512 | VDE                                  | 3  |
| 19 | 517 | 534 | VSGGISSTSAMGKGVTED                   | 18 |



Protein name: Transketolase

Predicted peptides: XP\_002793534 [Pb01]

| No. | Start | End | Peptide                                                                                                              | Length |
|-----|-------|-----|----------------------------------------------------------------------------------------------------------------------|--------|
| 1   | 5     | 7   | <b>NDV</b>                                                                                                           | 3      |
| 2   | 52    | 59  | NPKNPQWI                                                                                                             | 8      |
| 3   | 85    | 110 | AVSLDDLKDFRRLDSITPGHPEAHD                                                                                            | 26     |
| 4   | 138   | 149 | <b>GAVFNKPGFDLI</b>                                                                                                  | 12     |
| 5   | 193   | 210 | IDGDTKVAFTEDVMKRFE                                                                                                   | 18     |
| 6   | 221   | 226 | DGNNDL                                                                                                               | 6      |
| 7   | 255   | 358 | GSELQGTGGVHGNPLKADDSKGVKK<br>RFGFDPEQSFVVPQQVYDLYHKK<br>AAEGAAKEQEWNALLQQYASKYPAEHA<br>DFTRRLSGKLPEGWEKNLPRYSPTDPAIA | 104    |
| 8   | 387   | 408 | SNNTRWKDAVDFQPPSTGLGDW                                                                                               | 22     |
| 9   | 530   | 542 | <b>NLPQLEASSIEKA</b>                                                                                                 | 13     |
| 10  | 594   | 602 | <b>VFDVQDKEY</b>                                                                                                     | 9      |
| 11  | 623   | 626 | GWDR                                                                                                                 | 4      |
| 12  | 640   | 649 | SGPYKEVYKK                                                                                                           | 10     |
| 13  | 651   | 653 | <b>EFT</b>                                                                                                           | 3      |

Bepipred Linear Epitope Prediction 2.0

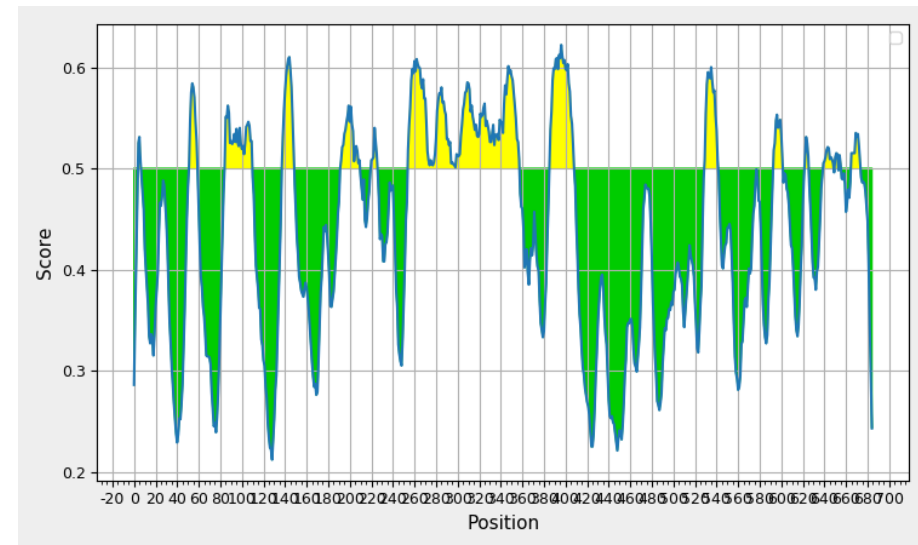

|    |     |     |                 |   |
|----|-----|-----|-----------------|---|
| 14 | 655 | 656 | EG              | 2 |
| 15 | 666 | 674 | <b>EFYKGSPL</b> | 9 |

**Predicted peptides: XP\_010760067 [Pb18]**

| No. | Start | End | Peptide                                                                               | Length |
|-----|-------|-----|---------------------------------------------------------------------------------------|--------|
| 1   | 5     | 10  | <b>NDVDQL</b>                                                                         | 6      |
| 2   | 12    | 50  | INTIRVLAVSIFYLSTIITQSACPISQSVLF<br>LKSARKITA                                          | 39     |
| 3   | 95    | 102 | NPKNPQWI                                                                              | 8      |
| 4   | 128   | 153 | AVSLDDLKDFRKLDSITPGHPEAHD                                                             | 26     |
| 5   | 181   | 192 | <b>GAVFNKPGFDLI</b>                                                                   | 12     |
| 6   | 235   | 253 | SIDGDTKVAFTEDVMKRFE                                                                   | 19     |
| 7   | 262   | 270 | VEDGNNDLA                                                                             | 9      |
| 8   | 298   | 315 | GSELQGTGGVHGNPLKAD                                                                    | 18     |
| 9   | 324   | 400 | FGFDPEQSFVVPQQVYDLYH<br>KKAEEGAAKEQEWNALLQQYASKYPAEHA<br>DFTRRLSGKLPEGWEKSLPRYSPTDPAI | 77     |
| 10  | 430   | 452 | SNNTRWKDAVDFQPPSTGLGDWT                                                               | 23     |
| 11  | 573   | 585 | <b>NLPQLEASSIEKA</b>                                                                  | 13     |
| 12  | 637   | 645 | <b>VFDVQDKEY</b>                                                                      | 9      |
| 13  | 647   | 649 | LSV                                                                                   | 3      |

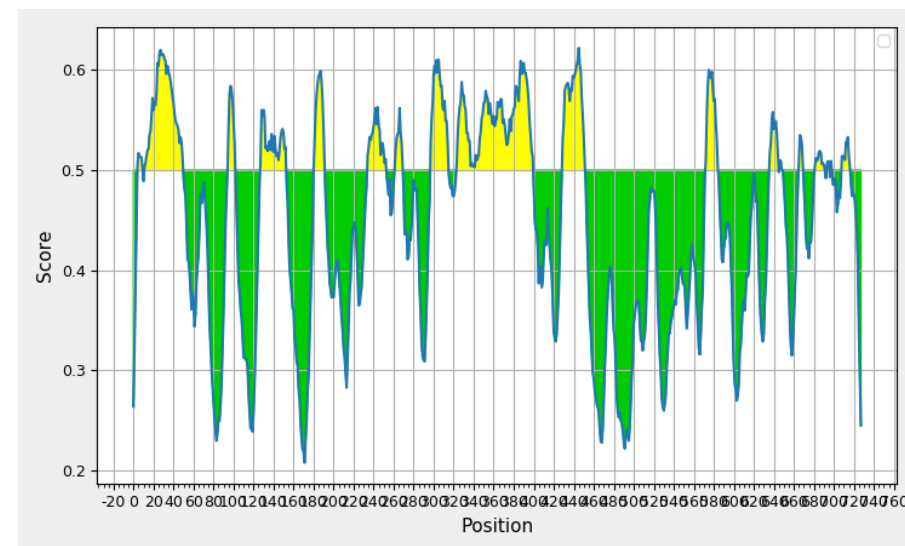

|    |     |     |                  |    |
|----|-----|-----|------------------|----|
| 14 | 666 | 670 | GWDRY            | 5  |
| 15 | 682 | 692 | ASGPYKEVYKK      | 11 |
| 16 | 694 | 696 | <b>EFT</b>       | 3  |
| 17 | 698 | 698 | E                | 1  |
| 18 | 709 | 717 | <b>EFYKGSPVL</b> | 9  |

Protein name: Enolase

Predicted peptides: XP\_015703472 [Pb01]

| No. | Start | End | Peptide                                      | Length |
|-----|-------|-----|----------------------------------------------|--------|
| 1   | 13    | 16  | <b>DSRG</b>                                  | 4      |
| 2   | 40    | 60  | STGQHEACELRDGDQSKWL GK                       | 21     |
| 3   | 82    | 89  | <b>IDVKDQSK</b>                              | 8      |
| 4   | 97    | 106 | LDGTPNKS KL                                  | 10     |
| 5   | 138   | 143 | AGTKKP                                       | 6      |
| 6   | 158   | 163 | SHAGGR                                       | 6      |
| 7   | 195   | 232 | RLRSL SQTEGPRQE EVRQSAGNVGDEG<br>GVAPDIQTPEE | 38     |
| 8   | 247   | 247 | T                                            | 1      |
| 9   | 264   | 292 | ADEK KYDLDFKNPDS DKSKWLTYEQLADL              | 29     |
| 10  | 310   | 318 | AEDDWEAWS                                    | 9      |
| 11  | 338   | 346 | PIRIKKAIE                                    | 9      |
| 12  | 387   | 391 | <b>GETED</b>                                 | 5      |
| 13  | 435   | 443 | <b>VYAGDKFERA</b>                            | 9      |

Predicted peptides: XP\_010759701 [Pb18]

Bepipred Linear Epitope Prediction 2.0

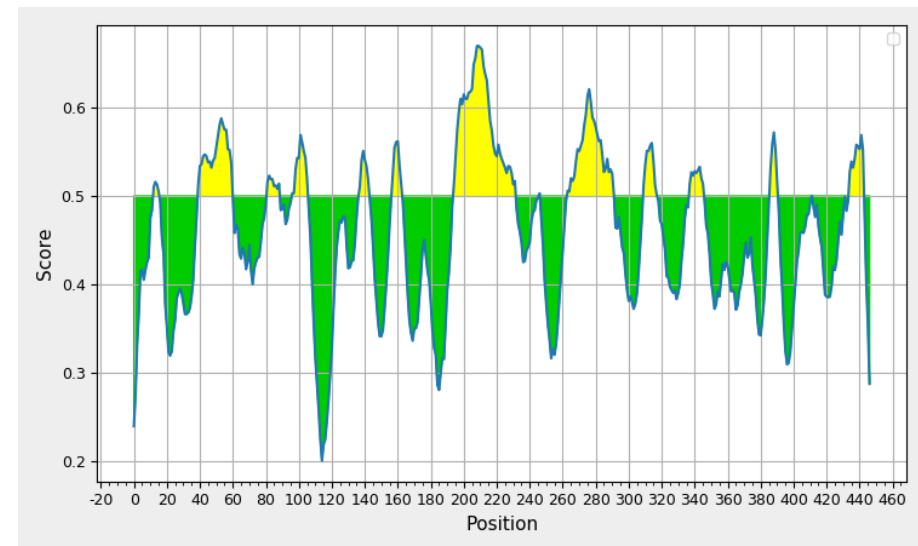

| No. | Start | End | Peptide                     | Length |
|-----|-------|-----|-----------------------------|--------|
| 1   | 13    | 16  | <b>DSRG</b>                 | 4      |
| 2   | 40    | 60  | STGQHEACELRDGDKSKWLGK       | 21     |
| 3   | 82    | 89  | <b>IDVKDQSK</b>             | 8      |
| 4   | 96    | 106 | KLDGTPNKSCL                 | 11     |
| 5   | 137   | 144 | LAGTKKPY                    | 8      |
| 6   | 157   | 164 | GSHAGGRL                    | 8      |
| 7   | 198   | 210 | KKKYQSAGNVGD                | 13     |
| 8   | 218   | 223 | IQTPEE                      | 6      |
| 9   | 237   | 238 | YT                          | 2      |
| 10  | 256   | 283 | DEKKYDLDFKNPDSKSKWLTYEQLADL | 28     |
| 11  | 301   | 310 | AEDDWEAWSY                  | 10     |
| 12  | 330   | 337 | IRIKKAIE                    | 8      |
| 13  | 378   | 382 | <b>GETED</b>                | 5      |
| 14  | 423   | 423 | S                           | 1      |
| 15  | 426   | 434 | <b>VYAGDKFRA</b>            | 9      |

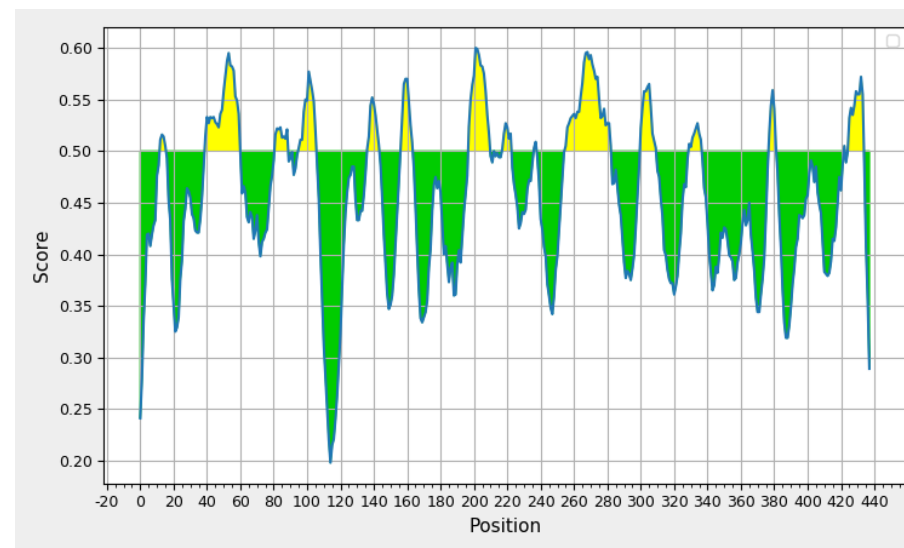

Protein name: Heat shock protein 60, mitochondrial

Predicted peptides: XP\_002789992 [Pb01]

Bepipred Linear Epitope Prediction 2.0

| No. | Start | End | Peptide                                            | Length |
|-----|-------|-----|----------------------------------------------------|--------|
| 1   | 5     | 49  | FTSSRASVLSSASSTRAPLSRFRSAG<br>VGLQQQRF AHKELKFGVEA | 45     |
| 2   | 69    | 70  | GP                                                 | 2      |
| 3   | 84    | 84  | P                                                  | 1      |
| 4   | 99    | 103 | <b>LQDKF</b>                                       | 5      |
| 5   | 120   | 123 | <b>EVAG</b>                                        | 4      |
| 6   | 166   | 166 | E                                                  | 1      |
| 7   | 168   | 195 | LQTNKRDIITTEELAQVATISANGDTHV                       | 28     |
| 8   | 204   | 209 | <b>EKVGKE</b>                                      | 6      |
| 9   | 219   | 221 | TID                                                | 3      |
| 10  | 231   | 232 | RF                                                 | 2      |
| 11  | 234   | 252 | RGYVSPYFITDTKAQKVEF                                | 19     |
| 12  | 258   | 284 | LLSEKKISAVQDIIPALEASTSLRRPL                        | 27     |
| 13  | 290   | 290 | D                                                  | 1      |
| 14  | 292   | 295 | EGEA                                               | 4      |

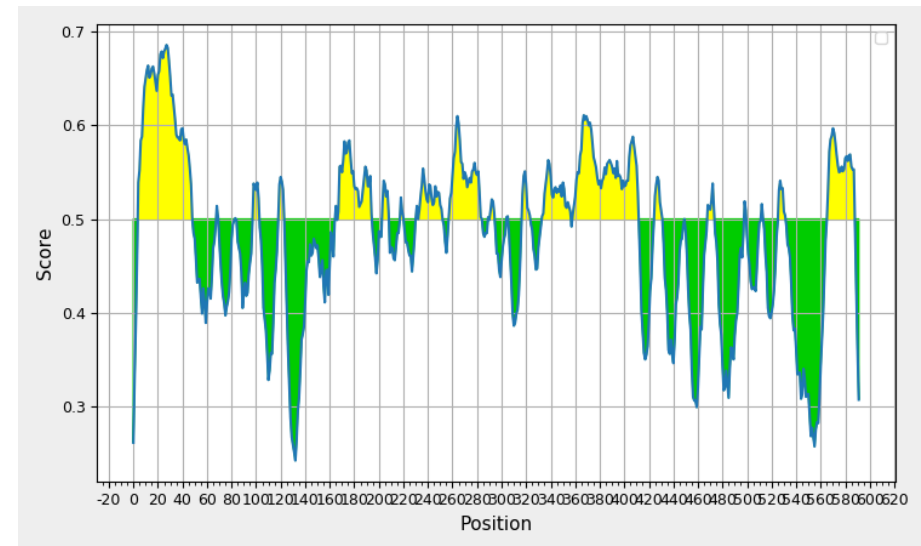

|    |     |     |                                                            |    |
|----|-----|-----|------------------------------------------------------------|----|
| 15 | 305 | 306 | RG                                                         | 2  |
| 16 | 318 | 324 | FGDNRKS                                                    | 7  |
| 17 | 334 | 357 | NATVFTDELDLKEKATPDMLGST                                    | 24 |
| 18 | 359 | 412 | SITTTKEDTIILNGEGSKDAIAQRCEQ<br>IRSVISDPATSDYEKEKLQERLAKLSG | 54 |
| 19 | 426 | 432 | EVGEKKD                                                    | 7  |
| 20 | 450 | 450 | <b>L</b>                                                   | 1  |
| 21 | 469 | 474 | <b>NPTNFD</b>                                              | 6  |
| 22 | 499 | 500 | LE                                                         | 2  |
| 23 | 513 | 514 | AG                                                         | 2  |
| 24 | 527 | 532 | YVDMIG                                                     | 6  |
| 25 | 567 | 588 | <b>PEEKVPAGSGAGGMGGGMGGMG</b>                              | 22 |

## Predicted peptides: XP\_010763632 [Pb18]

| No. | Start | End | Peptide                                                    | Length |
|-----|-------|-----|------------------------------------------------------------|--------|
| 1   | 5     | 11  | FTSSRAL                                                    | 7      |
| 2   | 17    | 51  | SSASSTRAPLSRFRSAGVGLQQRF<br>AHKELKFGVE                     | 35     |
| 3   | 72    | 72  | G                                                          | 1      |
| 4   | 86    | 88  | SPK                                                        | 3      |
| 5   | 102   | 106 | <b>LQDKF</b>                                               | 5      |
| 6   | 123   | 126 | <b>EVAG</b>                                                | 4      |
| 7   | 172   | 187 | QANKRDITTEEIAQV                                            | 16     |
| 8   | 191   | 198 | SANGDTHV                                                   | 8      |
| 9   | 204   | 204 | N                                                          | 1      |
| 10  | 207   | 212 | <b>EKVGKE</b>                                              | 6      |
| 11  | 221   | 224 | KTID                                                       | 4      |
| 12  | 234   | 255 | RFDRGYVSPYFITDTKAQKVEF                                     | 22     |
| 13  | 261   | 286 | LLSEKKISAVQDIIPALEASTLRRP                                  | 26     |
| 14  | 296   | 298 | GEA                                                        | 3      |
| 15  | 321   | 328 | FGDNRKSI                                                   | 8      |
| 16  | 341   | 415 | FTDELDLKLEKATPDMLGSTGSITITK<br>EDTIILNGEGSKDAIAQRCEQIRSVIS | 75     |

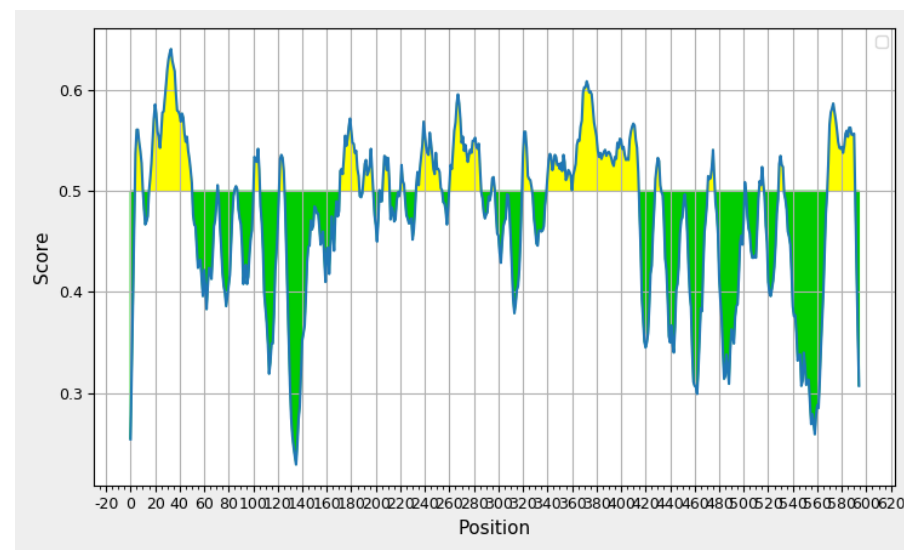



|    |     |     |                               |    |
|----|-----|-----|-------------------------------|----|
|    |     |     | DPATSDYEKEKLQERLAKLSG         |    |
| 17 | 429 | 433 | EVGEK                         | 5  |
| 18 | 472 | 477 | <b>NPTNED</b>                 | 6  |
| 19 | 502 | 502 | <b>L</b>                      | 1  |
| 20 | 514 | 517 | DFAS                          | 4  |
| 21 | 530 | 533 | YVDM                          | 4  |
| 22 | 570 | 591 | <b>PEEKVPAGSGAGGMGGGMGGMG</b> | 22 |

Protein name: Uncharacterized protein

Predicted peptides: XP\_002797075 [Pb01]

| No. | Start | End | Peptide                                                                 | Length |
|-----|-------|-----|-------------------------------------------------------------------------|--------|
| 1   | 5     | 11  | ATRQVVN                                                                 | 7      |
| 2   | 22    | 27  | SPRTL <sup>V</sup>                                                      | 6      |
| 3   | 41    | 42  | <b>EV</b>                                                               | 2      |
| 4   | 45    | 61  | FLNLKNTSPRARNTGR                                                        | 17     |
| 5   | 72    | 72  | A                                                                       | 1      |
| 6   | 74    | 78  | NAAVE                                                                   | 5      |
| 7   | 86    | 148 | IPSLSKLLPESSMFNSSKESYPT<br>KSALAKPRIKARTKEARRNRERDK<br>KREKKLADYGDGNSPE | 63     |
| 8   | 158   | 187 | SHHDHNVAVMQNPYYNAFHVAT<br>NSLEVQDL                                      | 30     |
| 9   | 192   | 242 | TICSEGVGYSEAPTKSPGDLVLKPPPW<br>LQHMDCFPKKKRMFPFRHQANVLR                 | 51     |
| 10  | 260   | 317 | REVMEKLVKVKAMTSNEEANEMAQEQEQ<br>EQEQEQEQEQEQGQRREQEQEEREMEGIR           | 58     |

Bepipred Linear Epitope Prediction 2.0

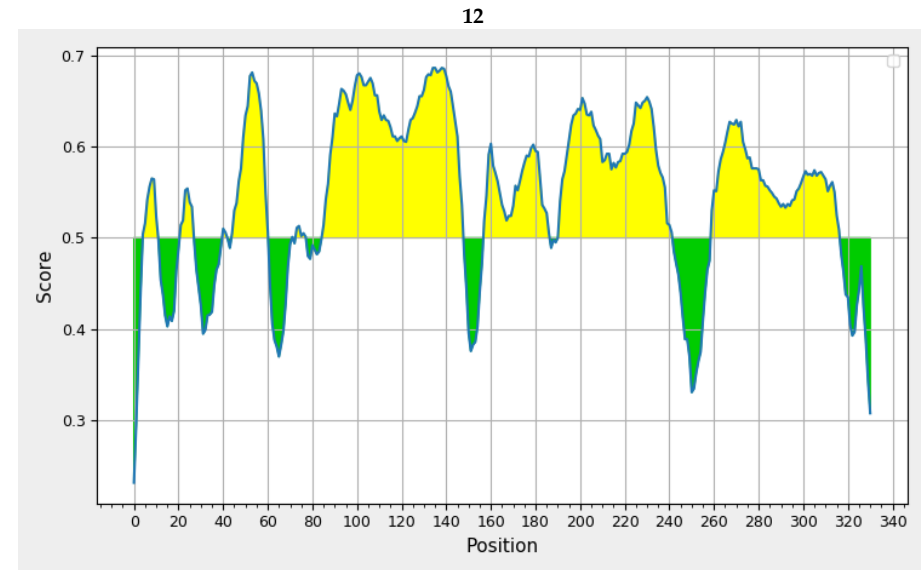

## Predicted peptides: XP\_010759641 [Pb18]

| No. | Start | End | Peptide                                                                                          | Length |
|-----|-------|-----|--------------------------------------------------------------------------------------------------|--------|
| 1   | 5     | 11  | AARQVAN                                                                                          | 7      |
| 2   | 22    | 28  | SPRTLVE                                                                                          | 7      |
| 3   | 41    | 42  | <b>EV</b>                                                                                        | 2      |
| 4   | 46    | 61  | LNLKNTSPRAMNTGR                                                                                  | 16     |
| 5   | 71    | 71  | D                                                                                                | 1      |
| 6   | 85    | 150 | PIPSLSKLLPESSMLNSGKESYP<br>TKSTLAKPRIKARTREARRNRERAKKK<br>RQNLADYDGDGSSPAP                       | 66     |
| 7   | 159   | 244 | SHHDHNVAVMQNPYYNAF<br>HIATNLLEVQDLMKTATNCS<br>EGVGYSEPTKSLGDLVLKPPPWLQH<br>MDCFPKKKRMFPFRHQGNVLR | 86     |
| 8   | 262   | 308 | EVMEKLVKKAMTSNKKANEMA<br>QEKEQGQGRIEQEQERESRELE                                                  | 47     |

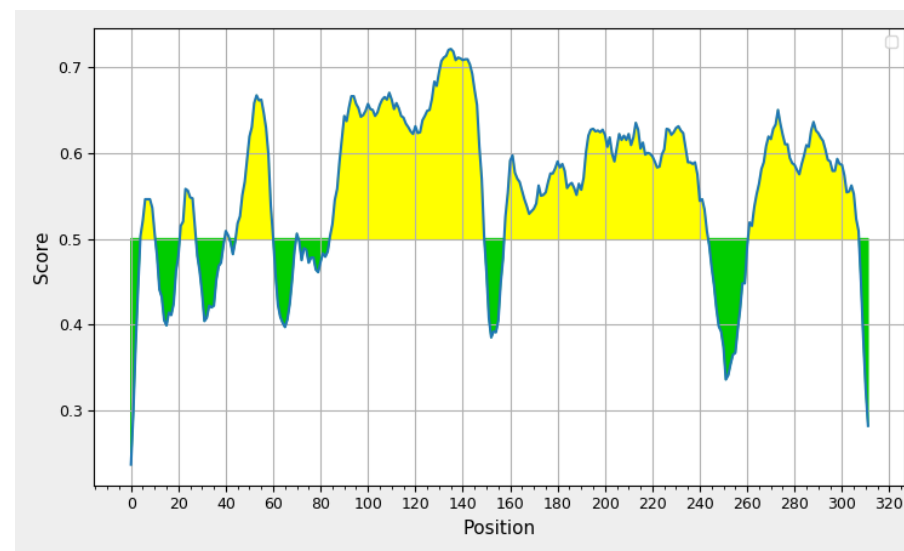

Protein name: Nucleoside diphosphate kinase

Predicted peptides: XP\_002794019 [Pb01]

| No. | Start | End | Peptide                          | Length |
|-----|-------|-----|----------------------------------|--------|
| 1   | 15    | 21  | <b>GVQRGLV</b>                   | 7      |
| 2   | 38    | 63  | <b>IKLVTPSKEHLEKHYEDLSSKPFNG</b> | 26     |
| 3   | 95    | 111 | NPADSAPGTIRGDY AID               | 17     |
| 4   | 123   | 129 | <b>VESAKKE</b>                   | 7      |
| 5   | 131   | 131 | <b>A</b>                         | 1      |
| 6   | 133   | 149 | <b>WEKPEELVKYEQSQANW</b>         | 17     |

Bepipred Linear Epitope Prediction 2.0

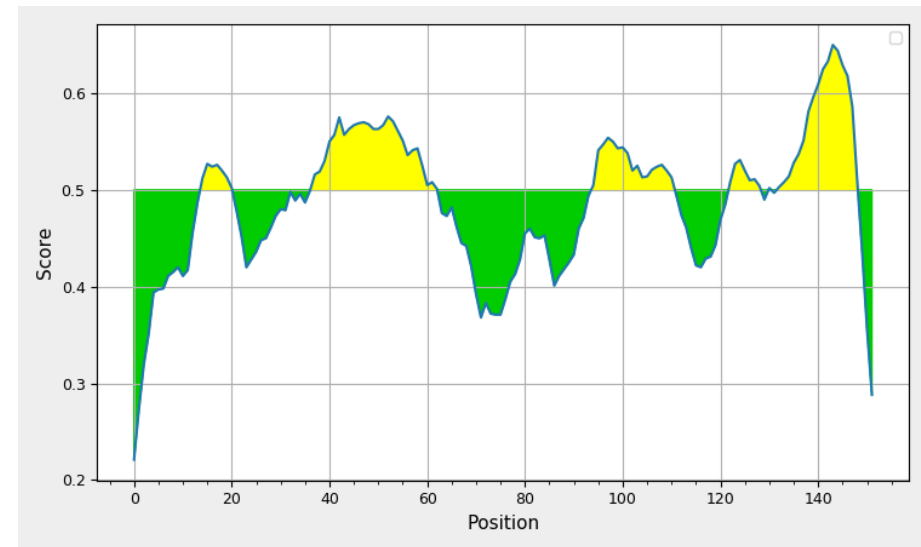

## Predicted peptides: XP\_010762888 [Pb18]

| No. | Start | End | Peptide                          | Length |
|-----|-------|-----|----------------------------------|--------|
| 1   | 15    | 21  | <b>GVQRGLV</b>                   | 7      |
| 2   | 38    | 63  | <b>IKLVTPSKEHLEKHYEDLSSKPFNG</b> | 26     |
| 3   | 94    | 111 | TNPADSAPGTIRGDY AID              | 18     |
| 4   | 123   | 129 | <b>VESAKKE</b>                   | 7      |
| 5   | 131   | 131 | <b>A</b>                         | 1      |
| 6   | 133   | 149 | <b>WEKPEELVKYEQSQANW</b>         | 17     |

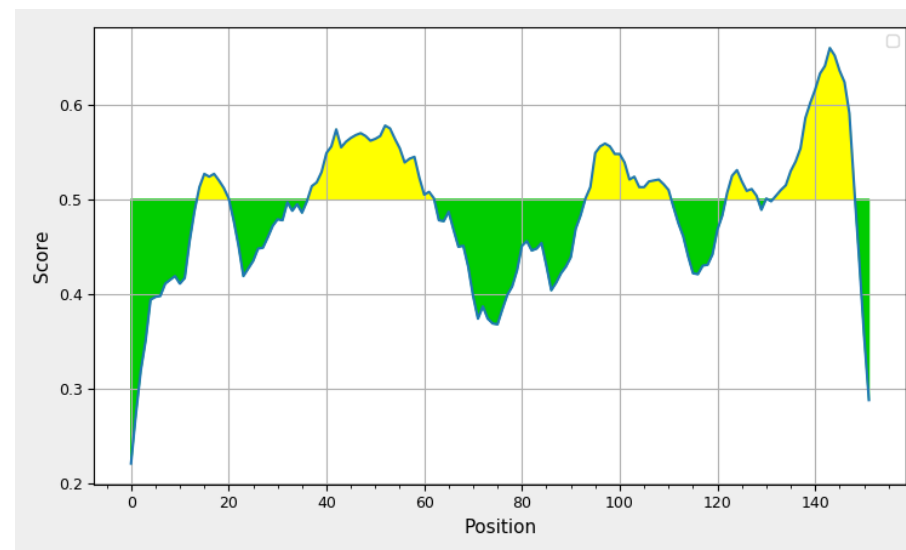

Protein name: Uncharacterized protein (Thioredoxin-like superfamily)

Predicted peptides: XP\_002794671 [Pb01]

| No. | Start | End | Peptide                               | Length |
|-----|-------|-----|---------------------------------------|--------|
| 1   | 4     | 17  | EQRAPLRLGSTAPN                        | 14     |
| 2   | 20    | 20  | <b>A</b>                              | 1      |
| 3   | 27    | 34  | IDFHEFIG                              | 8      |
| 4   | 81    | 97  | <b>KSHYDWINDINEVTGSD</b>              | 17     |
| 5   | 115   | 130 | DMIDYQDTTNVDEKGM                      | 16     |
| 6   | 151   | 161 | SYPASTGRNAA                           | 11     |
| 7   | 172   | 200 | <b>TTDKNGVNTPINWNVGGDDVIIPPAVKTED</b> | 29     |
| 8   | 203   | 203 | K                                     | 1      |
| 9   | 205   | 206 | FG                                    | 2      |

Bepipred Linear Epitope Prediction 2.0

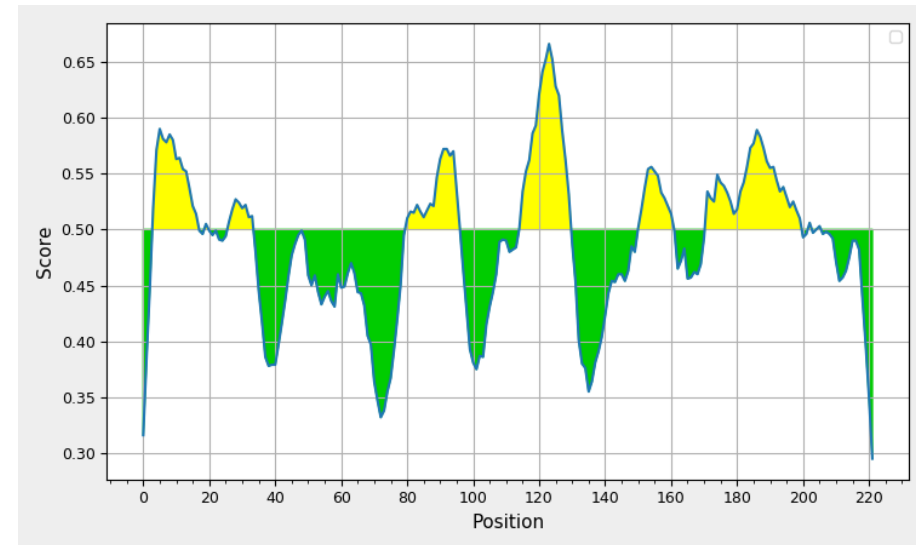

## Predicted peptides: XP\_010758730 [Pb18]

| I  | Start | End | Peptide                               | Length |
|----|-------|-----|---------------------------------------|--------|
| 1  | 4     | 17  | EHRAPLRLGSTAPN                        | 14     |
| 2  | 20    | 20  | <b>A</b>                              | 1      |
| 3  | 27    | 34  | IDFYEFIG                              | 8      |
| 4  | 49    | 49  | P                                     | 1      |
| 5  | 81    | 97  | <b>KSHYDWINDINEVTGSD</b>              | 17     |
| 6  | 116   | 129 | MIDYQDTTNVDEKG                        | 14     |
| 7  | 152   | 161 | YPASTGRNAA                            | 10     |
| 8  | 172   | 200 | <b>TTDKNGVNTPINWNVGGDDVIIPPAVKTED</b> | 29     |
| 9  | 202   | 203 | IK                                    | 2      |
| 10 | 205   | 209 | FGDVR                                 | 5      |

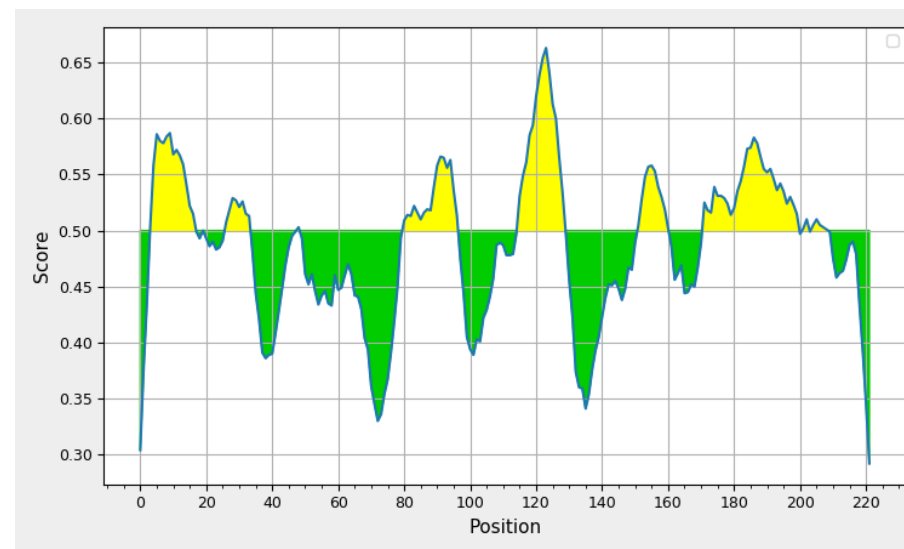

Protein name: Deoxyuridine 5'-triphosphate nucleotidohydrolase

Predicted peptides: XP\_002792326 [Pb01]

| No. | Start | End | Peptide                                                                            | Length |
|-----|-------|-----|------------------------------------------------------------------------------------|--------|
| 1   | 5     | 78  | TTPRPQTKASEESTTTNITANHP<br>PPSLPSSPLPKRAKITDMARATESSTA<br>PAAASSETATSTNPAVTSLSQLTP | 74     |
| 2   | 92    | 99  | <b>APTRGSAF</b>                                                                    | 8      |
| 3   | 197   | 213 | VLEVEELEESVRGVGGF                                                                  | 17     |

Bepipred Linear Epitope Prediction 2.0

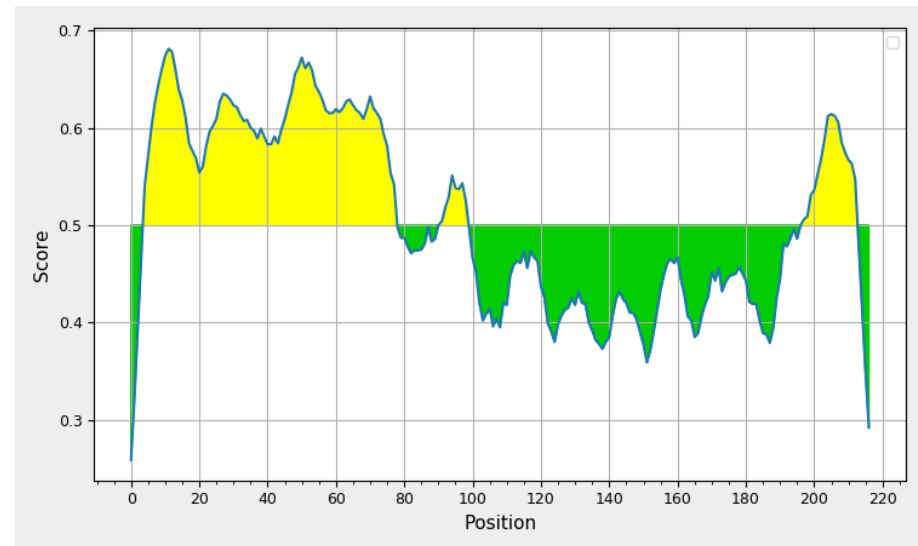



## Predicted peptides: XP\_010763035 [Pb18]

| No. | Start | End | Peptide                                                                          | Length |
|-----|-------|-----|----------------------------------------------------------------------------------|--------|
| 1   | 5     | 75  | TTPRPQTKASAESTTVNHPP<br>PSLPSSPLPKRAKITDMAPATESFTAPA<br>AAYSETATSTNPAVTLSLSQLTPP | 71     |
| 2   | 88    | 95  | <b>APTRGSAF</b>                                                                  | 8      |
| 3   | 194   | 209 | LEVEELEESVRGVGGF                                                                 | 16     |

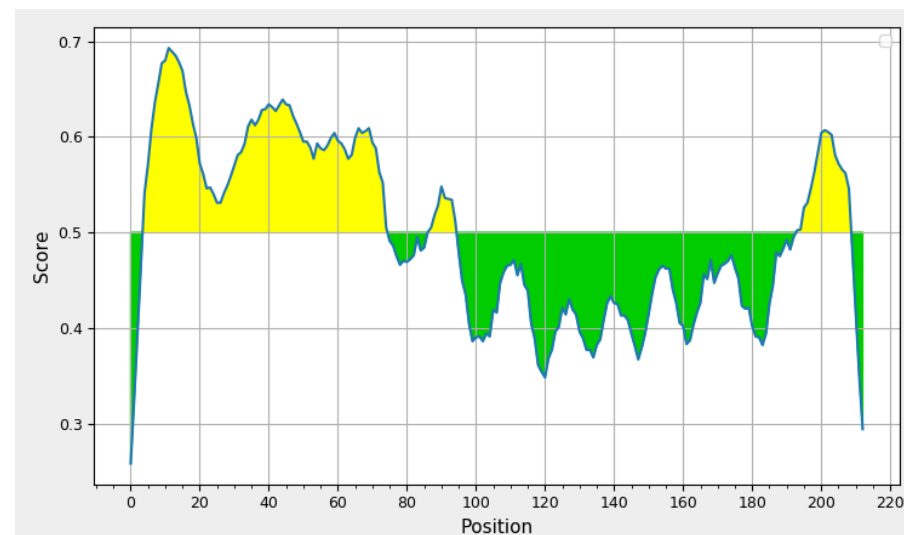

Protein name: Proliferating cell nuclear antigen

Predicted peptides: XP\_015700963 [Pb01]

| No. | Start | End | Peptide                         | Length |
|-----|-------|-----|---------------------------------|--------|
| 1   | 5     | 13  | LPQTLYSIP                       | 9      |
| 2   | 19    | 50  | IPDTLNLSFTHISTTPGRTGAQYLHSTISPA | 32     |
| 3   | 58    | 64  | FNIYPPQ                         | 7      |
| 4   | 151   | 152 | QN                              | 2      |
| 5   | 187   | 197 | MDIDQEHLAIP                     | 11     |
| 6   | 221   | 221 | <b>N</b>                        | 1      |
| 7   | 251   | 262 | RQHTNVDKPDQN                    | 12     |

Bepipred Linear Epitope Prediction 2.0

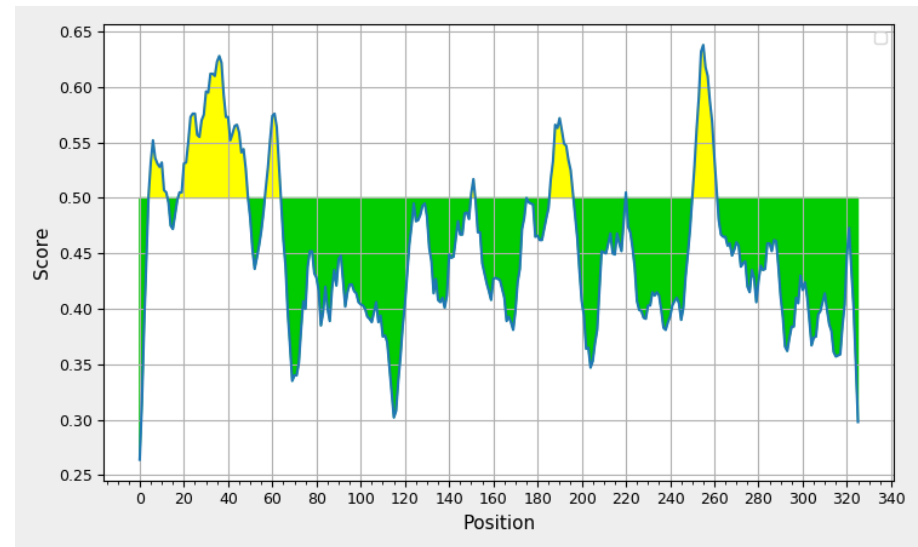

## Predicted peptides: XP\_010759909 [Pb18]

| No. | Start | End | Peptide                                                                                                                   | Length |
|-----|-------|-----|---------------------------------------------------------------------------------------------------------------------------|--------|
| 1   | 5     | 12  | SRFSTDSA                                                                                                                  | 8      |
| 2   | 15    | 125 | TGEGEGQEDWALQEDLSPSQPLDSSTANF<br>APRGPPTFQDRIRNRLPVPRQLKPLAKHQ<br>TLARISDFCKVWGRFFRFHDVDF<br>PLLTYTFRIDKAVVSTTIGKSENERFLE | 111    |
| 3   | 139   | 168 | EQCAPSYSAITGLLSNTRNEDQSSTRAAN                                                                                             | 30     |
| 4   | 193   | 200 | SRQGSOWN                                                                                                                  | 8      |
| 5   | 247   | 250 | SFDS                                                                                                                      | 4      |
| 6   | 264   | 290 | LVSRYRLSTPMPPIITRLEEQTQTRRC                                                                                               | 27     |
| 7   | 323   | 354 | NLEKYYDIYDFSPPEELETNALLA<br>DSAMEDGT                                                                                      | 32     |
| 8   | 383   | 391 | EGGEADIAN                                                                                                                 | 9      |
| 9   | 397   | 397 | E                                                                                                                         | 1      |
| 10  | 400   | 404 | QRLVA                                                                                                                     | 5      |
| 11  | 417   | 449 | LNEQDHNMIPPNPQAKLAPNKDHH<br>RAQLRRLNS                                                                                     | 33     |
| 12  | 468   | 484 | SDASLERATDDTDFGTT                                                                                                         | 17     |
| 13  | 505   | 505 | A                                                                                                                         | 1      |
| 14  | 511   | 584 | FATLENSGRLSRPTSSLKSPASPTFS                                                                                                | 74     |

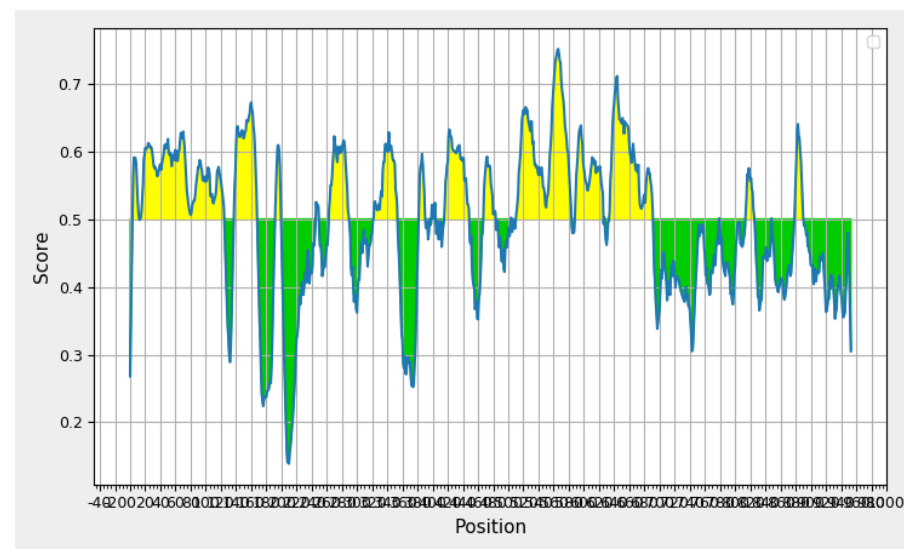

|    |     |     |                                                                    |    |
|----|-----|-----|--------------------------------------------------------------------|----|
|    |     |     | LSGVTAVDGGPPEALRALTGEDQQQQ<br>QQQQQQHQQLQSPDNNMDDDE                |    |
| 15 | 589 | 626 | IALPLKRNSMSREERIARMKE<br>ERARQAMVREKLDANTH                         | 38 |
| 16 | 628 | 628 | L                                                                  | 1  |
| 17 | 635 | 692 | IKLRPRKKASSNGARLPLTRR<br>DSCLATRRRALWPRKSSTAKLQL<br>PSTLHRAPLSPTNS | 58 |
| 18 | 780 | 780 | N                                                                  | 1  |
| 19 | 815 | 826 | MDIDQEHLAIPD                                                       | 12 |
| 20 | 849 | 849 | N                                                                  | 1  |
| 21 | 880 | 891 | QHTNVDPDQNV                                                        | 12 |

Protein name: Uncharacterized protein (14-3-3 Superfamily)

Predicted peptides: XP\_002791205 [Pb01]

Bepipred Linear Epitope Prediction 2.0

| No. | Start | End | Peptide                               | Length |
|-----|-------|-----|---------------------------------------|--------|
| 1   | 17    | 21  | ERYEE                                 | 5      |
| 2   | 31    | 31  | <b>S</b>                              | 1      |
| 3   | 33    | 40  | DKELSVEE                              | 8      |
| 4   | 57    | 57  | A                                     | 1      |
| 5   | 64    | 80  | SIEQKEESKGNEAQVAL                     | 17     |
| 6   | 82    | 87  | <b>KEYRQN</b>                         | 6      |
| 7   | 108   | 114 | <b>IASAETG</b>                        | 7      |
| 8   | 138   | 145 | DKRKDSAD                              | 8      |
| 9   | 149   | 149 | E                                     | 1      |
| 10  | 159   | 165 | <b>QTDLAPT</b>                        | 7      |
| 11  | 187   | 189 | <b>PDQ</b>                            | 3      |
| 12  | 191   | 191 | C                                     | 1      |
| 13  | 206   | 215 | <b>DTLSEESYKD</b>                     | 10     |
| 14  | 230   | 262 | WTSSEAEPAPEVAPAPAEQ<br>KDEAPASTSEDAPK | 33     |

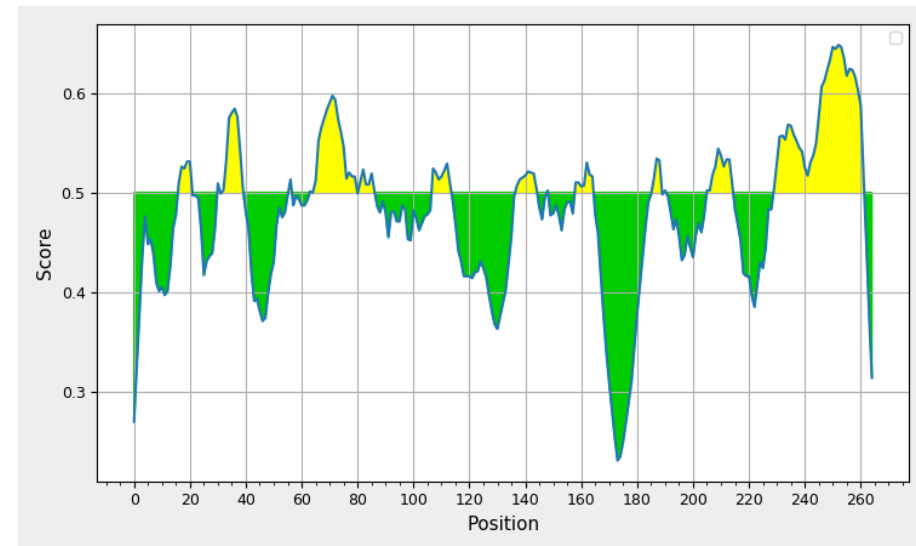

## Predicted peptides: XP\_010759842 [Pb18]

| No. | Start | End | Peptide                                                                                                | Length |
|-----|-------|-----|--------------------------------------------------------------------------------------------------------|--------|
| 1   | 10    | 10  | <b>S</b>                                                                                               | 1      |
| 2   | 13    | 18  | KELSVE                                                                                                 | 6      |
| 3   | 35    | 36  | RA                                                                                                     | 2      |
| 4   | 38    | 38  | W                                                                                                      | 1      |
| 5   | 45    | 59  | EQKEESKGN <del>EA</del> QVAL                                                                           | 15     |
| 6   | 61    | 66  | <b>KEYRQN</b>                                                                                          | 6      |
| 7   | 87    | 93  | <b>IASAETG</b>                                                                                         | 7      |
| 8   | 117   | 123 | DKRKDSA                                                                                                | 7      |
| 9   | 138   | 144 | <b>QTDLAPT</b>                                                                                         | 7      |
| 10  | 166   | 168 | <b>PDQ</b>                                                                                             | 3      |
| 11  | 185   | 194 | <b>DTLSEESYKD</b>                                                                                      | 10     |
| 12  | 209   | 241 | WTSS <del>EA</del> EP <del>AP</del> EV <del>AP</del> AP <del>SE</del> QKDEA<br>PAATSE <del>D</del> APK | 33     |

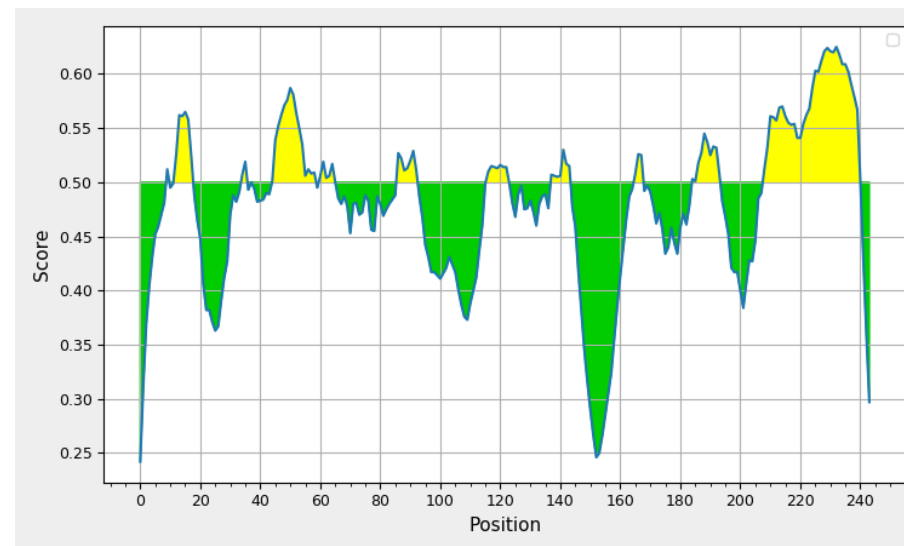

Protein name: 14-3-3 family protein epsilon

Predicted peptides: XP\_002796914 [Pb01]

Bepipred Linear Epitope Prediction 2.0

| No. | Start | End | Peptide                                                      | Length |
|-----|-------|-----|--------------------------------------------------------------|--------|
| 1   | 5     | 6   | RE                                                           | 2      |
| 2   | 19    | 23  | ERYDE                                                        | 5      |
| 3   | 33    | 33  | N                                                            | 1      |
| 4   | 36    | 41  | GELTVD                                                       | 6      |
| 5   | 69    | 82  | QKEDSKGSEKHVAI                                               | 14     |
| 6   | 85    | 86  | EY                                                           | 2      |
| 7   | 88    | 89  | QK                                                           | 2      |
| 8   | 110   | 116 | IPKAESG                                                      | 7      |
| 9   | 140   | 141 | NK                                                           | 2      |
| 10  | 143   | 143 | K                                                            | 1      |
| 11  | 161   | 167 | QTELTPT                                                      | 7      |
| 12  | 189   | 191 | PDR                                                          | 3      |
| 13  | 207   | 217 | LDLSEESYRD                                                   | 11     |
| 14  | 233   | 289 | TSSDGAPEPVAAGDGKDDKTAEGEEG<br>PATATTTDAPAPEEVAAPAAADEEPKKEGT | 57     |

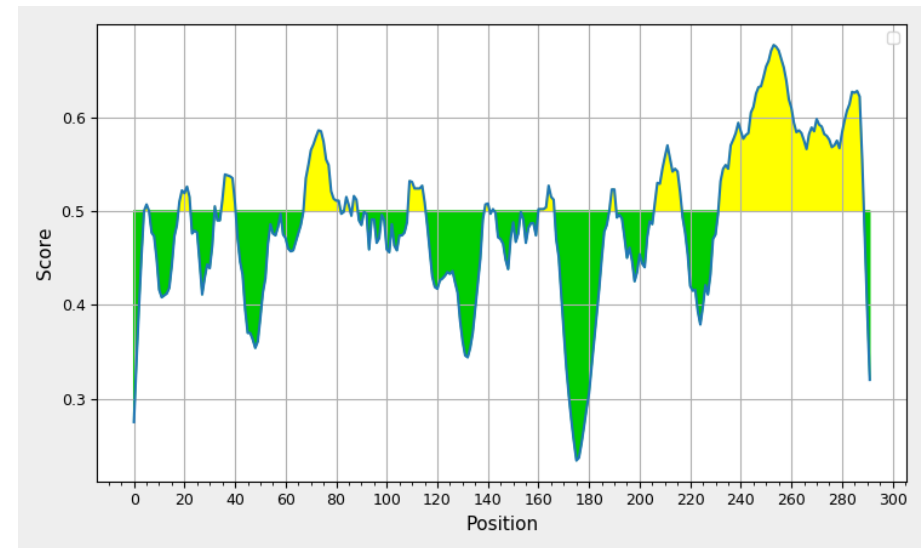

## Predicted peptides: XP\_010759301 [Pb18]

| No. | Start | End | Peptide                                                       | Length |
|-----|-------|-----|---------------------------------------------------------------|--------|
| 1   | 8     | 28  | LPIHSSGVCRANYNLSYSVK                                          | 21     |
| 2   | 41    | 45  | <b>ERYDE</b>                                                  | 5      |
| 3   | 55    | 63  | NLGGELTVD                                                     | 9      |
| 4   | 91    | 104 | <b>QKEDSKGSEKHVAI</b>                                         | 14     |
| 5   | 107   | 108 | <b>EY</b>                                                     | 2      |
| 6   | 110   | 111 | <b>QK</b>                                                     | 2      |
| 7   | 132   | 138 | <b>IPKAESG</b>                                                | 7      |
| 8   | 162   | 163 | <b>NK</b>                                                     | 2      |
| 9   | 165   | 165 | <b>K</b>                                                      | 1      |
| 10  | 176   | 176 | K                                                             | 1      |
| 11  | 183   | 183 | Q                                                             | 1      |
| 12  | 187   | 187 | T                                                             | 1      |
| 13  | 212   | 213 | DR                                                            | 2      |
| 14  | 229   | 239 | <b>LDSLSEESYRD</b>                                            | 11     |
| 15  | 255   | 311 | TSSDGAPEPEPAAAGDGKDDKTAEGEEGS<br>ATATTADPPAPEEMAAPAAADEPKKEGT | 57     |

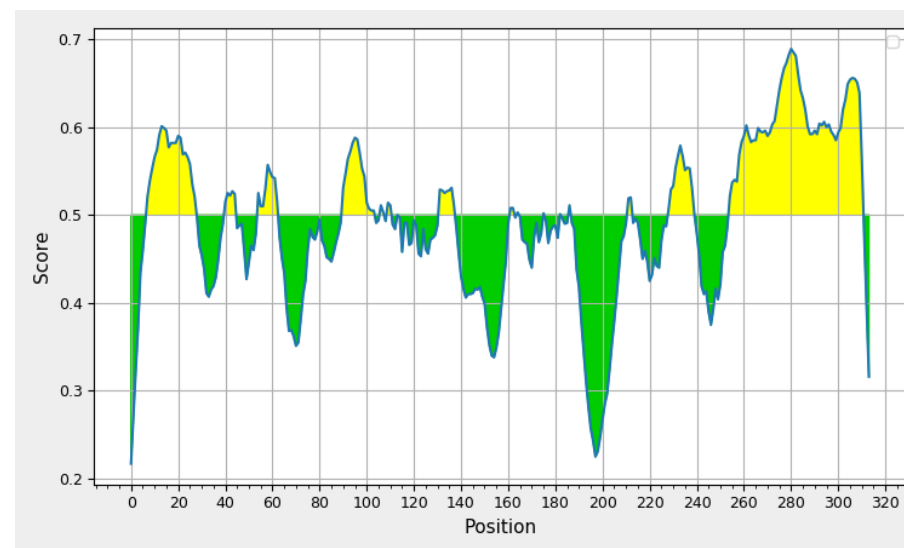



Protein name: Spermidine synthase

Predicted peptides: XP\_002793533 [Pb01]

| No. | Start | End | Peptide                         | Length |
|-----|-------|-----|---------------------------------|--------|
| 1   | 5     | 10  | THPTIK                          | 6      |
| 2   | 18    | 24  | SDMWPGQ                         | 7      |
| 3   | 35    | 39  | HHEKS                           | 5      |
| 4   | 65    | 71  | TERDEFS                         | 7      |
| 5   | 108   | 110 | ETV                             | 3      |
| 6   | 128   | 139 | <b>KYLPGMSVGFQH</b>             | 12     |
| 7   | 171   | 179 | EGPAEALFQ                       | 9      |
| 8   | 203   | 208 | QWLHLS                          | 6      |
| 9   | 218   | 219 | <b>RE</b>                       | 2      |
| 10  | 246   | 271 | <b>KDSSRDVREPVRTWTREEEKLCRY</b> | 26     |
| 11  | 273   | 273 | K                               | 1      |

Bepipred Linear Epitope Prediction 2.0

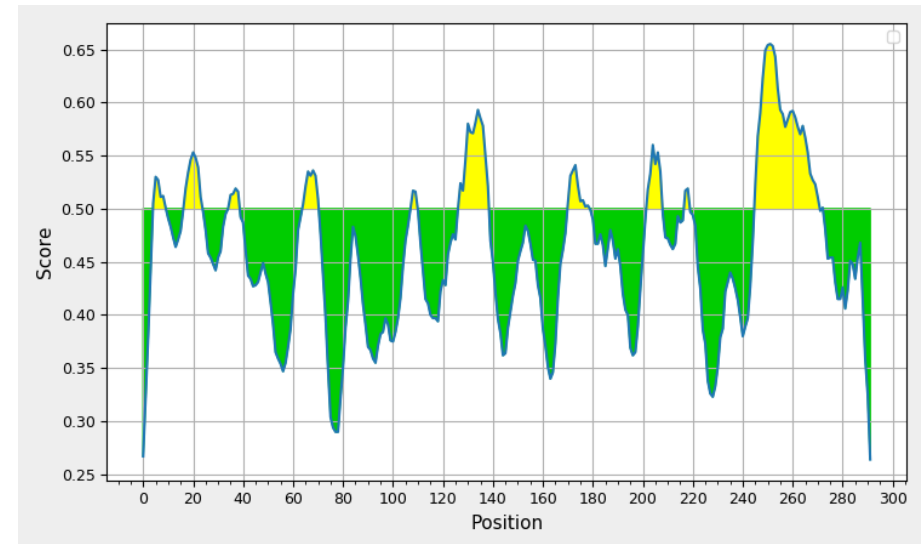

## Predicted peptides: XP\_010760066 [Pb18]

| No. | Start | End | Peptide                          | Length |
|-----|-------|-----|----------------------------------|--------|
| 1   | 17    | 20  | HEKS                             | 4      |
| 2   | 47    | 51  | ERDEF                            | 5      |
| 3   | 89    | 92  | ETVE                             | 4      |
| 4   | 109   | 120 | <b>KYLPGMSVGFQH</b>              | 12     |
| 5   | 152   | 156 | EGPAE                            | 5      |
| 6   | 183   | 191 | ENQWLHLSL                        | 9      |
| 7   | 200   | 201 | <b>RE</b>                        | 2      |
| 8   | 228   | 253 | <b>KDSSRDVREPVRTWTREEEEKLCRY</b> | 26     |

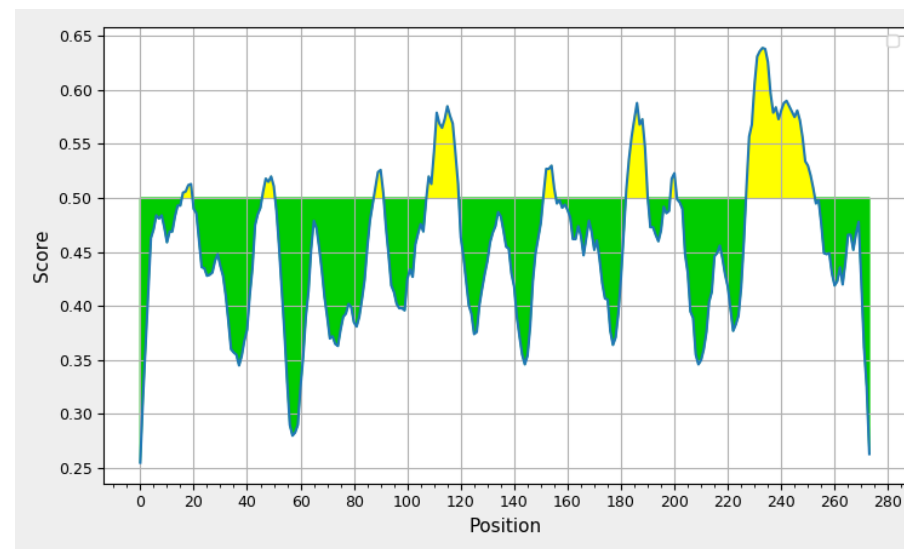

Protein name: Phosphomannomutase

Predicted peptides: XP\_002797030 [Pb01]

| No. | Start | End | Peptide                 | Length |
|-----|-------|-----|-------------------------|--------|
| 1   | 5     | 15  | AGVYPPLEARP             | 11     |
| 2   | 29    | 39  | LTPARGTVAPE             | 11     |
| 3   | 61    | 75  | LAKQQEQLGTQTTDV         | 15     |
| 4   | 97    | 97  | M                       | 1      |
| 5   | 100   | 113 | NSFIKWLGEELYQN          | 14     |
| 6   | 126   | 137 | KLPRKRGTFVEY            | 12     |
| 7   | 146   | 168 | PVGRSASVEERNEFEEDKVVHNI | 23     |
| 8   | 178   | 182 | KEFAD                   | 5      |
| 9   | 214   | 220 | EKNISGV                 | 7      |
| 10  | 231   | 247 | KCFKGGNDHEIYEDSRT       | 17     |
| 11  | 256   | 257 | DD                      | 2      |
| 12  | 259   | 260 | MR                      | 2      |

Bepipred Linear Epitope Prediction 2.0

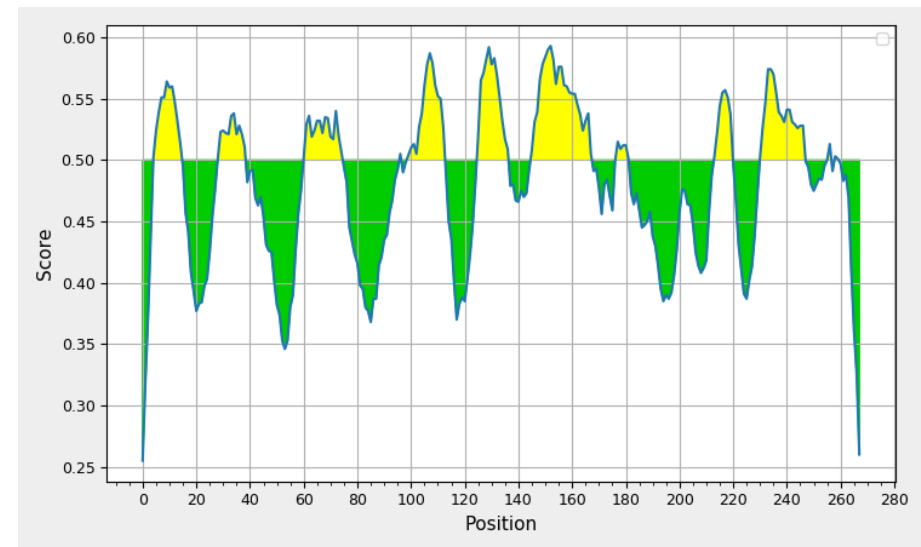

## Predicted peptides: XP\_010759656 [Pb18]

| No. | Start | End | Peptide                                             | Length |
|-----|-------|-----|-----------------------------------------------------|--------|
| 1   | 5     | 16  | AGVYPPLEARPL                                        | 12     |
| 2   | 30    | 39  | TPARGTVAPE                                          | 10     |
| 3   | 62    | 67  | AKQQEQ                                              | 6      |
| 4   | 69    | 70  | GT                                                  | 2      |
| 5   | 73    | 75  | TDV                                                 | 3      |
| 6   | 99    | 113 | SNSFIKWLGEELYQN                                     | 15     |
| 7   | 122   | 168 | ISSVKLPRKRGTFVEYRNGMVNISPVG<br>RSASVEERNEFEEDKVVHNI | 47     |
| 8   | 177   | 182 | RKEFAD                                              | 6      |
| 9   | 215   | 220 | KNISGV                                              | 6      |
| 10  | 232   | 249 | CFKGGNDHEIYEDSRTIG                                  | 18     |
| 11  | 255   | 261 | PDDTMRQ                                             | 7      |

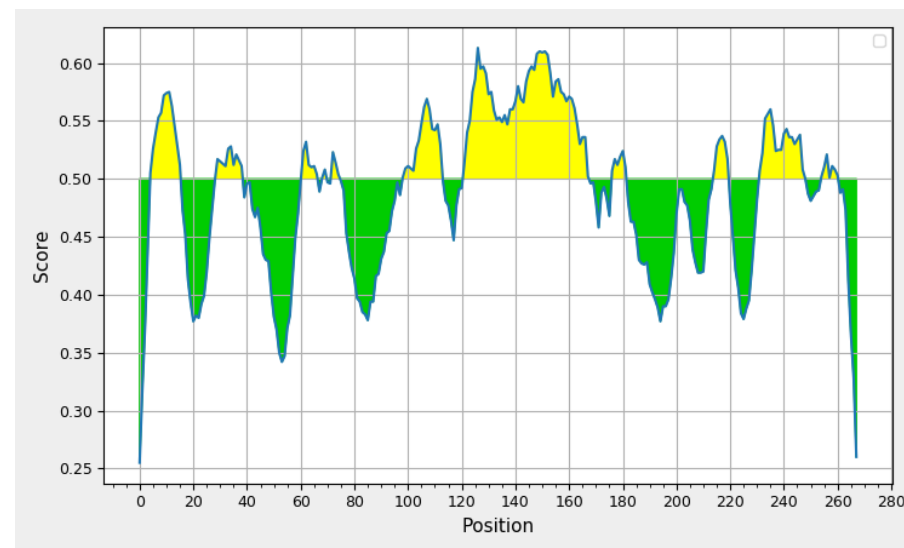

Protein name: 4-hydroxyphenylpyruvate dioxygenase

Predicted peptides: XP\_002789912 [Pb01]

| No. | Start | End | Peptide                        | Length |
|-----|-------|-----|--------------------------------|--------|
| 1   | 5     | 25  | AVSPPPSTRGTQQHNDLSSYK          | 21     |
| 2   | 54    | 63  | AYRGLETGSR                     | 10     |
| 3   | 84    | 102 | RSLDDLQSFSPEEQALLTE            | 19     |
| 4   | 108   | 109 | <b>EK</b>                      | 2      |
| 5   | 139   | 149 | VSGIKTLEDCQ                    | 11     |
| 6   | 173   | 197 | YNGIFLPGYREENTKDPLSLLPPV       | 25     |
| 7   | 212   | 240 | EEMEKVCEYYEKALGFHRFWSVDDKDICT  | 29     |
| 8   | 266   | 280 | <b>KGKKQSQIEEYVNFY</b>         | 15     |
| 9   | 309   | 338 | FIKVPETYYTEMKQRLERSGMKLFEDFEML | 30     |
| 10  | 376   | 383 | <b>NFSGFGAG</b>                | 8      |
| 11  | 394   | 399 | <b>REQALR</b>                  | 6      |

Bepred Linear Epitope Prediction 2.0

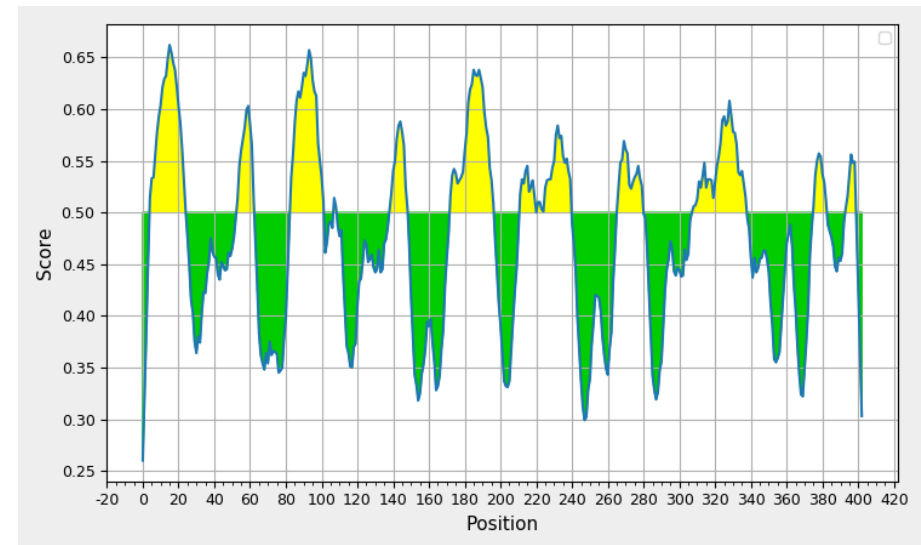

## Predicted peptides: XP\_010763814 [Pb18]

| No. | Start | End | Peptide                         | Length |
|-----|-------|-----|---------------------------------|--------|
| 1   | 5     | 25  | AVSPPTTRDTQQHNNDLSSY            | 21     |
| 2   | 54    | 64  | IAYRGLETGSR                     | 11     |
| 3   | 85    | 103 | RSLDDLSQFSPEEQTLLE              | 19     |
| 4   | 106   | 107 | SH                              | 2      |
| 5   | 109   | 110 | <b>EK</b>                       | 2      |
| 6   | 141   | 150 | SSIKTLEDSQ                      | 10     |
| 7   | 174   | 198 | YKGIFLPGYREEHTKDPLSLLPPV        | 25     |
| 8   | 213   | 221 | EEMEKVCEY                       | 9      |
| 9   | 224   | 224 | K                               | 1      |
| 10  | 227   | 241 | GFHRFWSVDDKDICT                 | 15     |
| 11  | 267   | 281 | <b>KGKKQSQIEEYVNFY</b>          | 15     |
| 12  | 309   | 339 | EFIKVPETYTEMKQRLERSGMKLIKEDFEML | 31     |
| 13  | 377   | 384 | <b>NFSGFGAG</b>                 | 8      |
| 14  | 395   | 400 | <b>REQALR</b>                   | 6      |

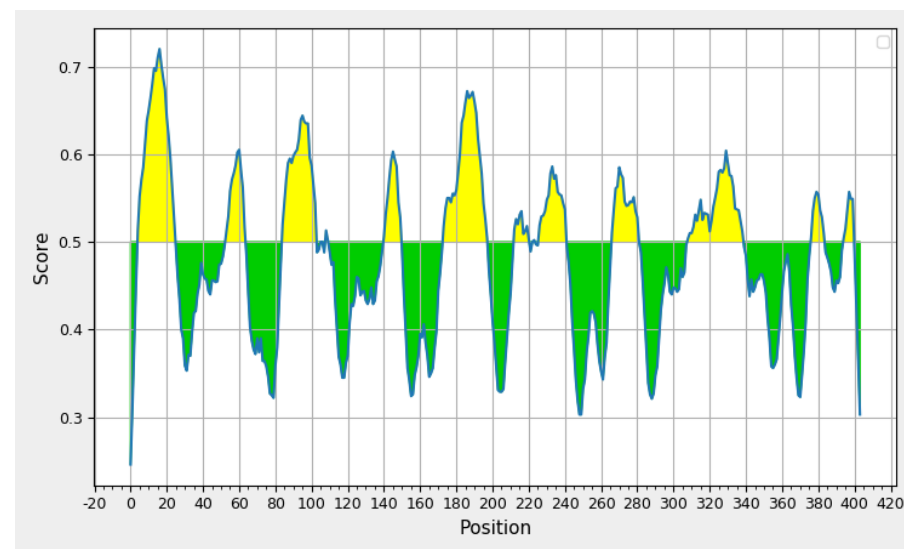

Protein name: Uncharacterized protein (Cyclophilin superfamily )

Bepred Linear Epitope Prediction 2.0

Predicted peptides: XP\_015701903 [Pb01]

| No. | Start | End | Peptide                                                                   | Length |
|-----|-------|-----|---------------------------------------------------------------------------|--------|
| 1   | 5     | 27  | TGTSSDSLPSNHTRSPRDALERR                                                   | 23     |
| 2   | 65    | 79  | TGEKGEGKSGKLLSY                                                           | 15     |
| 3   | 98    | 123 | FTAFNGTGGESIYGEKFDDENFDLKH                                                | 26     |
| 4   | 175   | 185 | KSQTDTSKPY                                                                | 11     |
| 5   | 194   | 258 | GQLSGDSYEAAKEVSVDETGDKY<br>EDYPEDAGETLSGAEYYKIAS<br>EVKEFGNKAFKSGNLDLGLEK | 65     |
| 6   | 260   | 261 | QK                                                                        | 2      |
| 7   | 267   | 282 | NECPEPSDSDPPELQG                                                          | 16     |
| 8   | 304   | 308 | <b>RFDDA</b>                                                              | 5      |
| 9   | 321   | 329 | AAQAKDTR                                                                  | 9      |
| 10  | 344   | 350 | <b>KDDEAAL</b>                                                            | 7      |
| 11  | 360   | 365 | <b>APGDAA</b>                                                             | 6      |
| 12  | 367   | 368 | <b>VS</b>                                                                 | 2      |
| 13  | 371   | 388 | ARVKKTIAEQQRKEKEML                                                        | 18     |

Predicted peptides: XP\_010761900 [Pb18]

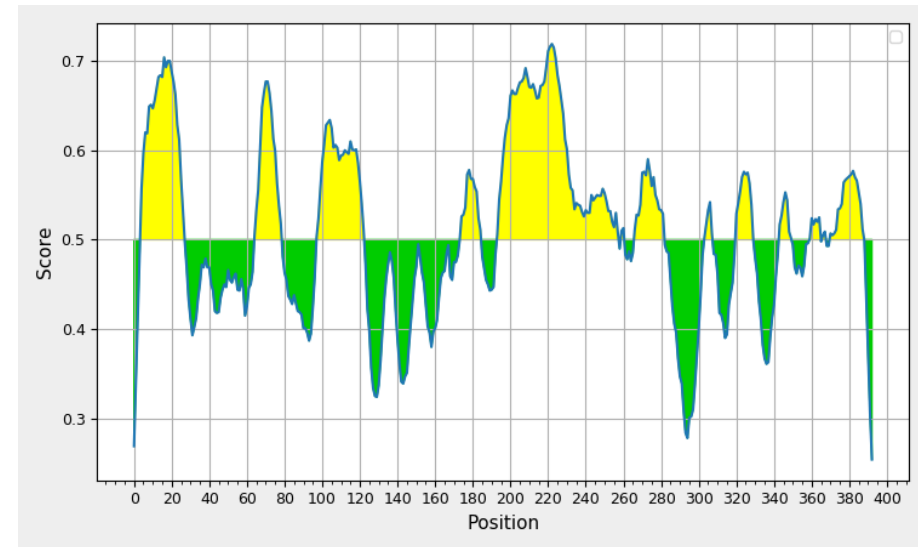

| No. | Start | End | Peptide                                                                 | Length |
|-----|-------|-----|-------------------------------------------------------------------------|--------|
| 1   | 45    | 59  | TGEKGEGKSGKQLSY                                                         | 15     |
| 2   | 79    | 103 | TAFNGTGGESIYGEKFDNFDLKH                                                 | 25     |
| 3   | 155   | 165 | KSPTDTSKPH                                                              | 11     |
| 4   | 175   | 237 | QLSGDSYEAAKEVSVDETGDKYED<br>YPEDAGETLSGAEYKIASSEVK<br>EFGNKAFKSGNLDLGLE | 63     |
| 5   | 248   | 262 | ECPEPSDSDPPELQG                                                         | 15     |
| 6   | 284   | 288 | <b>RFDDA</b>                                                            | 5      |
| 7   | 299   | 310 | ATAAQAKDTDRA                                                            | 12     |
| 8   | 324   | 330 | <b>KDDEAAL</b>                                                          | 7      |
| 9   | 340   | 345 | <b>APGDAA</b>                                                           | 6      |
| 10  | 347   | 348 | <b>VS</b>                                                               | 2      |
| 11  | 351   | 368 | ARVKKSIAEQQRKEKEML                                                      | 18     |

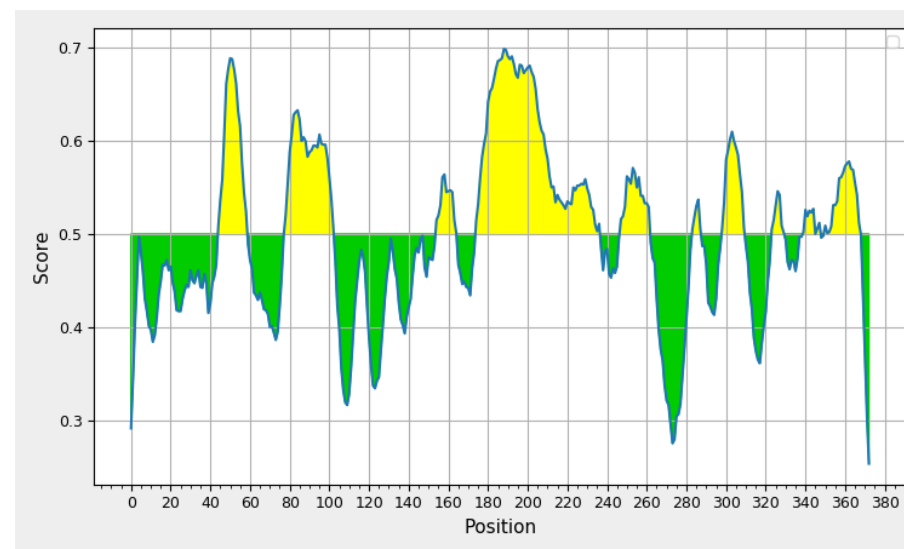



Protein name: Thioredoxin reductase

Predicted peptides: XP\_002791109 [Pb01]

| No. | Start | End | Peptide                                | Length |
|-----|-------|-----|----------------------------------------|--------|
| 1   | 36    | 42  | MANGTAA                                | 7      |
| 2   | 52    | 63  | VENFPGFPHGIG                           | 12     |
| 3   | 90    | 111 | <b>VDLSCRPFKLWKEFSDGPDDAP</b>          | 22     |
| 4   | 126   | 139 | ARRLDLPGEQQYWQ                         | 14     |
| 5   | 151   | 156 | AVPIFR                                 | 6      |
| 6   | 192   | 197 | <b>LRASKT</b>                          | 6      |
| 7   | 224   | 224 | <b>A</b>                               | 1      |
| 8   | 234   | 242 | IKNVVGVE                               | 9      |
| 9   | 260   | 262 | TAL                                    | 3      |
| 10  | 268   | 268 | E                                      | 1      |
| 11  | 283   | 283 | Y                                      | 1      |
| 12  | 322   | 355 | AESEGGDEPPFVATSIEQSNQ<br>GENAPPTLEYTSN | 34     |

Bepipred Linear Epitope Prediction 2.0

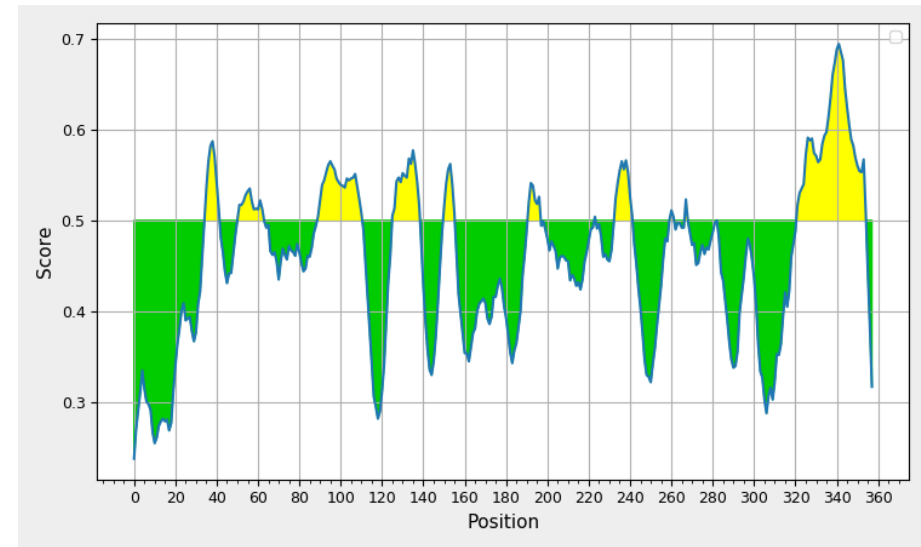

## Predicted peptides: XP\_010756960 [Pb18]

| No. | Start | End | Peptide                                | Length |
|-----|-------|-----|----------------------------------------|--------|
| 1   | 35    | 43  | MMANGTAAG                              | 9      |
| 2   | 51    | 63  | DIENFPGFNGIG                           | 13     |
| 3   | 90    | 111 | <b>VDLSCRPFKLWKEFSDBGDDAP</b>          | 22     |
| 4   | 127   | 139 | RRLDLPGEQQYWQ                          | 13     |
| 5   | 150   | 156 | GAVPIFR                                | 7      |
| 6   | 192   | 197 | <b>LRASKT</b>                          | 6      |
| 7   | 199   | 199 | A                                      | 1      |
| 8   | 224   | 224 | <b>A</b>                               | 1      |
| 9   | 234   | 242 | IKNVSGGE                               | 9      |
| 10  | 258   | 258 | P                                      | 1      |
| 11  | 260   | 269 | TALVKGQIET                             | 10     |
| 12  | 322   | 355 | AESEGGDEPPLVATSIEQSNQG<br>ENAPPTLEYTSN | 34     |

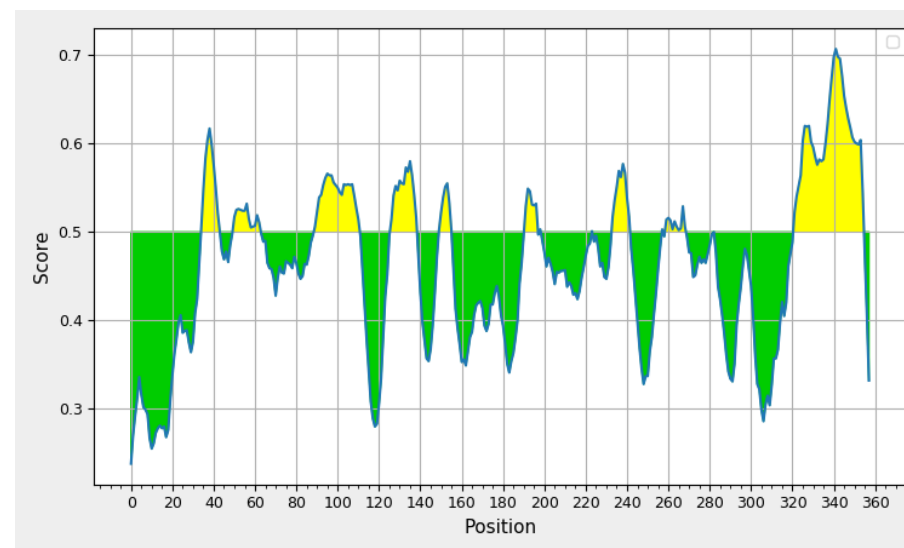

Protein name: ATP synthase subunit beta

Predicted peptides: XP\_002789970 [Pb01]

Bepipred Linear Epitope Prediction 2.0

| No. | Start | End | Peptide                                                        | Length |
|-----|-------|-----|----------------------------------------------------------------|--------|
| 1   | 5     | 6   | RY                                                             | 2      |
| 2   | 18    | 33  | LAANPIAQRPSERFE                                                | 16     |
| 3   | 46    | 69  | LTKIRSSHPHFLDSLTRNLAPHPV                                       | 24     |
| 4   | 84    | 141 | SPFRQVPPPLLHITSIMFKSGVART<br>FARSALARSSLRLPQNPALRSLASRYASTSSGQ | 58     |
| 5   | 160   | 163 | <b>EQLP</b>                                                    | 4      |
| 6   | 198   | 204 | <b>GTEGLVR</b>                                                 | 7      |
| 7   | 214   | 218 | PIMIP                                                          | 5      |
| 8   | 234   | 265 | PIDERGPIKHSKKAPIHAEAPEFVEQSTTAEV                               | 32     |
| 9   | 294   | 294 | <b>G</b>                                                       | 1      |
| 10  | 323   | 328 | <b>TREGND</b>                                                  | 6      |
| 11  | 337   | 343 | RVIQLDG                                                        | 7      |
| 12  | 357   | 357 | P                                                              | 1      |
| 13  | 378   | 378 | E                                                              | 1      |
| 14  | 405   | 423 | GRIPSAVGYQPTLAVDMGG                                            | 19     |

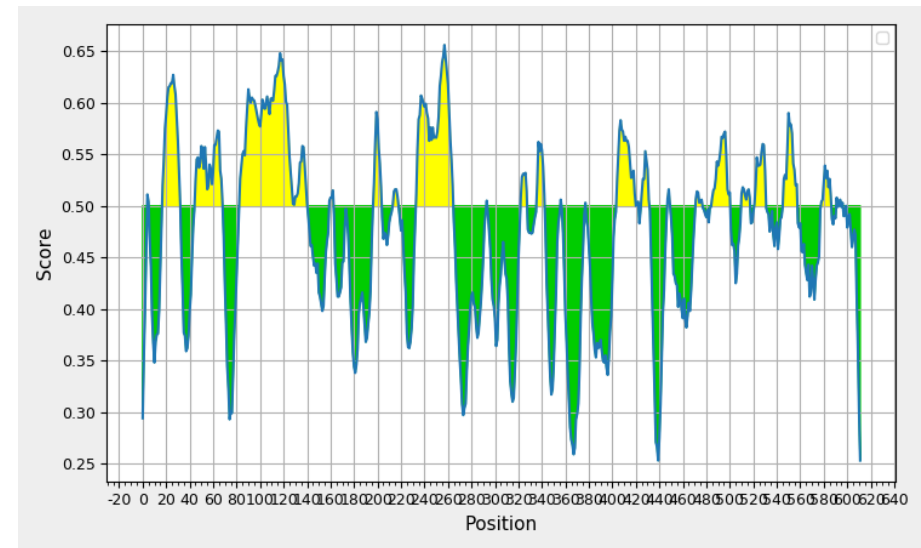

|    |     |     |                   |    |
|----|-----|-----|-------------------|----|
| 15 | 426 | 432 | <b>ERITTTT</b>    | 7  |
| 16 | 448 | 450 | DLT               | 3  |
| 17 | 472 | 477 | SELGIY            | 6  |
| 18 | 486 | 501 | KSRMLDPRIVGEEHYE  | 16 |
| 19 | 511 | 518 | <b>QEYKSLQD</b>   | 8  |
| 20 | 522 | 531 | <b>ILGMDELSEA</b> | 10 |
| 21 | 547 | 558 | SQPFTVAQVFTG      | 12 |
| 22 | 579 | 587 | GEGDDLPEA         | 9  |
| 23 | 592 | 592 | V                 | 1  |
| 24 | 594 | 595 | DF                | 2  |
| 25 | 597 | 597 | S                 | 1  |

## Predicted peptides: XP\_010763627 [Pb18]

| No. | Start | End | Peptide                              | Length |
|-----|-------|-----|--------------------------------------|--------|
| 1   | 8     | 30  | RTFARSALARHSLRLPQNPALRS              | 23     |
| 2   | 33    | 41  | SRYASTSSG                            | 9      |
| 3   | 61    | 64  | <b>EQLP</b>                          | 4      |
| 4   | 99    | 105 | <b>GTEGLVR</b>                       | 7      |
| 5   | 116   | 119 | IMIP                                 | 4      |
| 6   | 134   | 167 | DPIDERGPIKHSKAPIHAEPEFV<br>EQSTTAEVL | 34     |
| 7   | 195   | 195 | <b>G</b>                             | 1      |
| 8   | 224   | 229 | <b>TREGND</b>                        | 6      |
| 9   | 237   | 244 | TRVIQLDG                             | 8      |
| 10  | 258   | 259 | PP                                   | 2      |
| 11  | 279   | 279 | <b>E</b>                             | 1      |
| 12  | 306   | 320 | GRIPSAVGYQPTLAV                      | 15     |
| 13  | 327   | 333 | <b>ERITTTT</b>                       | 7      |
| 14  | 349   | 350 | DL                                   | 2      |
| 15  | 373   | 379 | SELGIYP                              | 7      |
| 16  | 385   | 402 | DSKSRMLDPRIVGEEHYE                   | 18     |

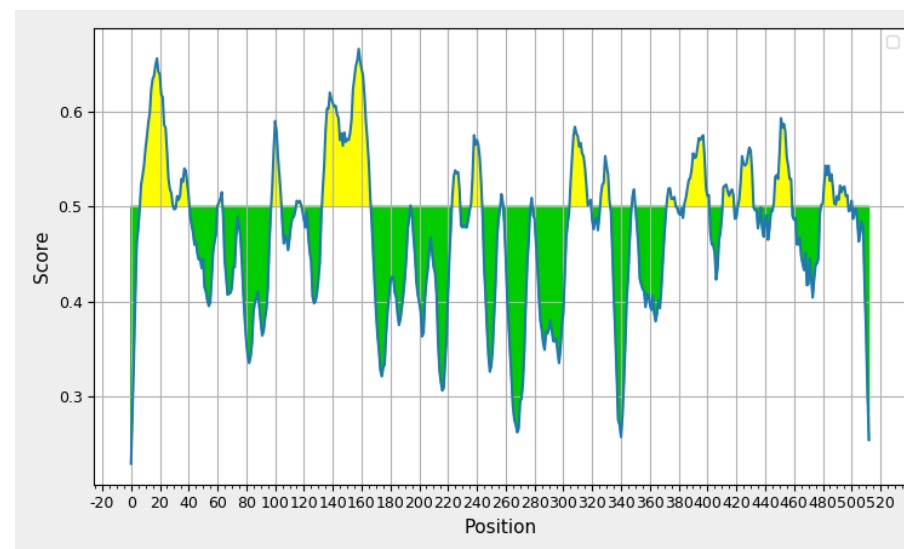

|    |     |     |                    |    |
|----|-----|-----|--------------------|----|
| 17 | 412 | 419 | <b>QEYKSLQD</b>    | 8  |
| 18 | 423 | 432 | <b>ILGMDELSEA</b>  | 10 |
| 19 | 447 | 459 | LSQPFTVAQVFTG      | 13 |
| 20 | 480 | 498 | GEGDDLPEAAFYMVGFES | 19 |
| 21 | 501 | 501 | A                  | 1  |

Protein name: Hexokinase

Predicted peptides: XP\_002791907 [Pb01]

| No. | Start | End | Peptide                          | Length |
|-----|-------|-----|----------------------------------|--------|
| 1   | 5     | 13  | SSSSSVLDE                        | 9      |
| 2   | 23    | 30  | YSAEELNR                         | 8      |
| 3   | 37    | 37  | <b>R</b>                         | 1      |
| 4   | 40    | 52  | <b>HEGLEEEGATLRQ</b>             | 13     |
| 5   | 54    | 55  | PT                               | 2      |
| 6   | 58    | 65  | TAVPEGTE                         | 8      |
| 7   | 105   | 110 | LMTTKN                           | 6      |
| 8   | 129   | 154 | HQSEHFDLHIKKRQTGQITAPYTDDH       | 26     |
| 9   | 168   | 173 | QHGINS                           | 6      |
| 10  | 181   | 191 | KGFDIKEAVGK                      | 11     |
| 11  | 230   | 231 | <b>GP</b>                        | 2      |
| 12  | 254   | 274 | RVTKLDKKNNGDSAAAKYDRAT           | 21     |
| 13  | 287   | 294 | <b>DNHLSVLP</b>                  | 8      |
| 14  | 304   | 313 | NDSVNPGIQM                       | 10     |
| 15  | 339   | 370 | AVKLFNSNSAARQNGLVTIIPADSGLHKQWGI | 32     |

Bepipred Linear Epitope Prediction 2.0

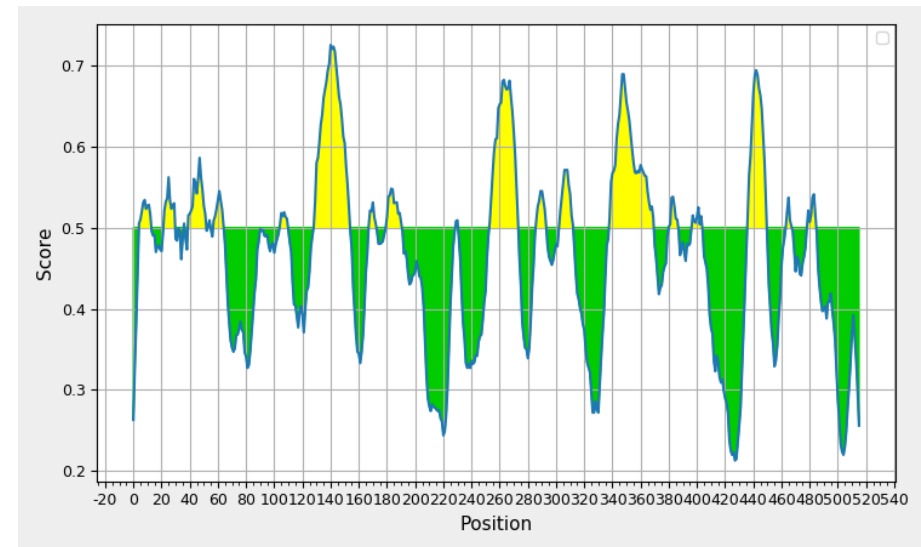

|    |     |     |                |    |
|----|-----|-----|----------------|----|
| 16 | 381 | 387 | DDSPAFD        | 7  |
| 17 | 398 | 404 | <b>GIENAST</b> | 7  |
| 18 | 437 | 450 | GRLRGEGEVEKGDG | 14 |
| 19 | 465 | 468 | PGFE           | 4  |
| 20 | 480 | 485 | <b>GIGENG</b>  | 6  |

Predicted peptides: XP\_010763342 [Pb18]

| No. | Start | End | Peptide                    | Length |
|-----|-------|-----|----------------------------|--------|
| 1   | 5     | 13  | SSSSPVLDE                  | 9      |
| 2   | 23    | 30  | YPAEELNR                   | 8      |
| 3   | 33    | 34  | RE                         | 2      |
| 4   | 37    | 37  | <b>R</b>                   | 1      |
| 5   | 40    | 52  | <b>HEGLEEEGATLRQ</b>       | 13     |
| 6   | 55    | 55  | T                          | 1      |
| 7   | 58    | 64  | TAVPEGT                    | 7      |
| 8   | 109   | 110 | KN                         | 2      |
| 9   | 130   | 155 | QSEHFDLHIKKRQTGEITAPYTDDHI | 26     |
| 10  | 169   | 172 | HGIN                       | 4      |
| 11  | 182   | 191 | GFDIKEAVGK                 | 10     |
| 12  | 230   | 231 | <b>GP</b>                  | 2      |

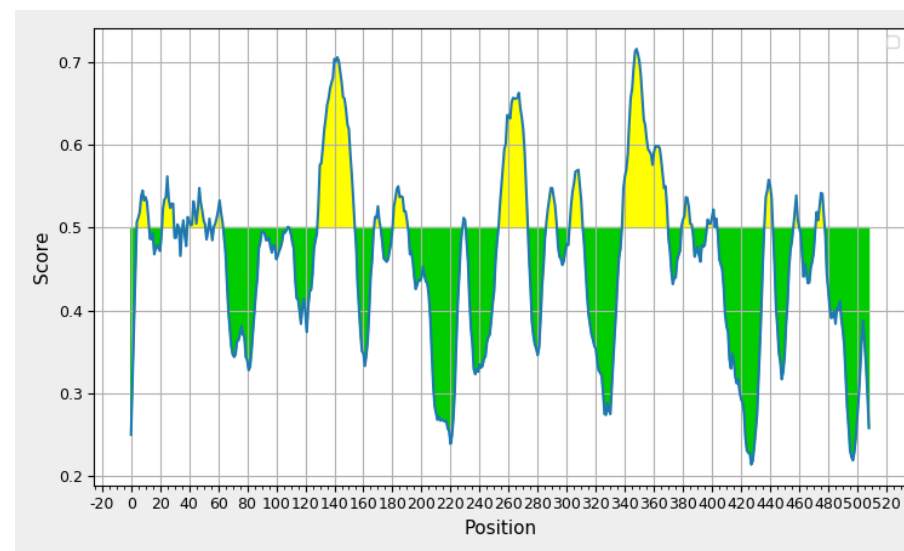



|    |     |     |                                     |    |
|----|-----|-----|-------------------------------------|----|
| 13 | 254 | 274 | RVTKLDDKKNNGNSADAKYDRAT             | 21 |
| 14 | 287 | 294 | <b>DNHLSVLP</b>                     | 8  |
| 15 | 303 | 312 | DNDSVNPGIQ                          | 10 |
| 16 | 339 | 370 | AVMLFNNSAAGQNGLVTIIP<br>ADSDLHKQWGI | 32 |
| 17 | 380 | 387 | ADDSPAFD                            | 8  |
| 18 | 398 | 404 | <b>GIENAST</b>                      | 7  |
| 19 | 437 | 442 | DRLRGD                              | 6  |
| 20 | 457 | 461 | YPGFE                               | 5  |
| 21 | 473 | 478 | <b>GIGENG</b>                       | 6  |

Protein name: Hsp75-like protein

Predicted peptides: XP\_015700721 [Pb01]

Bepipred Linear Epitope Prediction 2.0

| No. | Start | End | Peptide                   | Length |
|-----|-------|-----|---------------------------|--------|
| 1   | 5     | 6   | <b>EV</b>                 | 2      |
| 2   | 35    | 38  | <b>NEQG</b>               | 4      |
| 3   | 61    | 68  | NQAAMNPQ                  | 8      |
| 4   | 79    | 102 | GRRFDDPVVKKDVESWPFKVVDDQG | 24     |
| 5   | 138   | 138 | <b>K</b>                  | 1      |
| 6   | 140   | 140 | <b>A</b>                  | 1      |
| 7   | 154   | 159 | FNDNQR                    | 6      |
| 8   | 193   | 196 | RSEK                      | 4      |
| 9   | 251   | 267 | <b>ERKTKKDLSGDPRALRR</b>  | 17     |
| 10  | 277   | 277 | R                         | 1      |
| 11  | 280   | 281 | SN                        | 2      |
| 12  | 330   | 334 | <b>NIDKS</b>              | 5      |
| 13  | 356   | 369 | SDFFNGKKLEKSIN            | 14     |
| 14  | 388   | 394 | QATSADT                   | 7      |
| 15  | 410   | 431 | AMEGNIFAPVVPRGQTVPTIKK    | 22     |

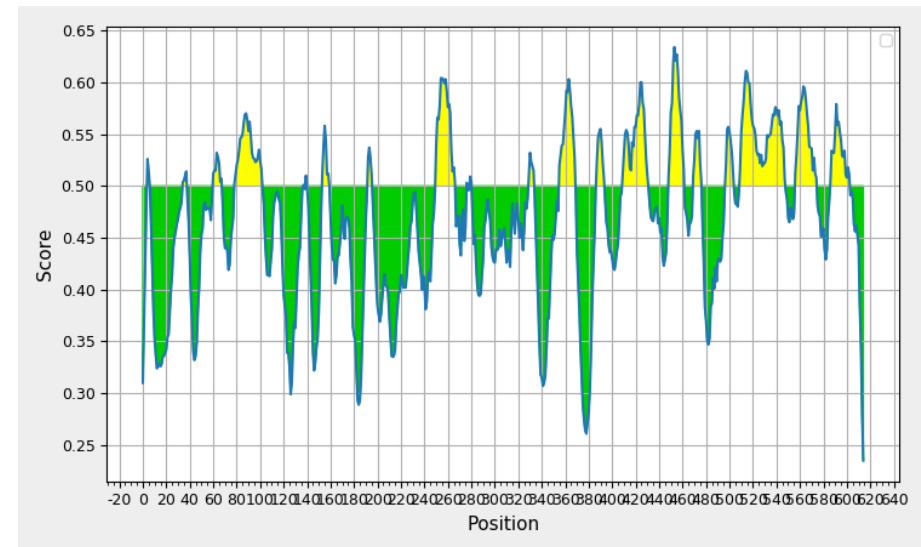

|    |     |     |                                             |    |
|----|-----|-----|---------------------------------------------|----|
| 16 | 449 | 462 | <b>YQERTNCEDNTSL</b>                        | 14 |
| 17 | 470 | 477 | <b>IPPMKAGD</b>                             | 8  |
| 18 | 498 | 504 | EKSSGRS                                     | 7  |
| 19 | 510 | 548 | SNAVGKLSSTEIENMINDAAR<br>FKSSDEAFSKRFESRQQL | 39 |
| 20 | 557 | 575 | <b>EIISDPTMSLKIKRGNKEK</b>                  | 19 |
| 21 | 587 | 603 | <b>LEIEDSSPEDLKKKELA</b>                    | 17 |

Predicted peptides: XP\_010758595 [Pb18]

| No. | Start | End | Peptide                    | Length |
|-----|-------|-----|----------------------------|--------|
| 1   | 5     | 6   | <b>EV</b>                  | 2      |
| 2   | 35    | 38  | <b>NEQG</b>                | 4      |
| 3   | 62    | 66  | QAAMN                      | 5      |
| 4   | 68    | 68  | Q                          | 1      |
| 5   | 79    | 103 | GRRFDDPVVKKDVESWPFKVVVDQGG | 25     |
| 6   | 115   | 116 | TK                         | 2      |
| 7   | 138   | 138 | <b>K</b>                   | 1      |
| 8   | 140   | 140 | <b>A</b>                   | 1      |
| 9   | 154   | 160 | FNDNQRQ                    | 7      |
| 10  | 193   | 197 | RSEKE                      | 5      |

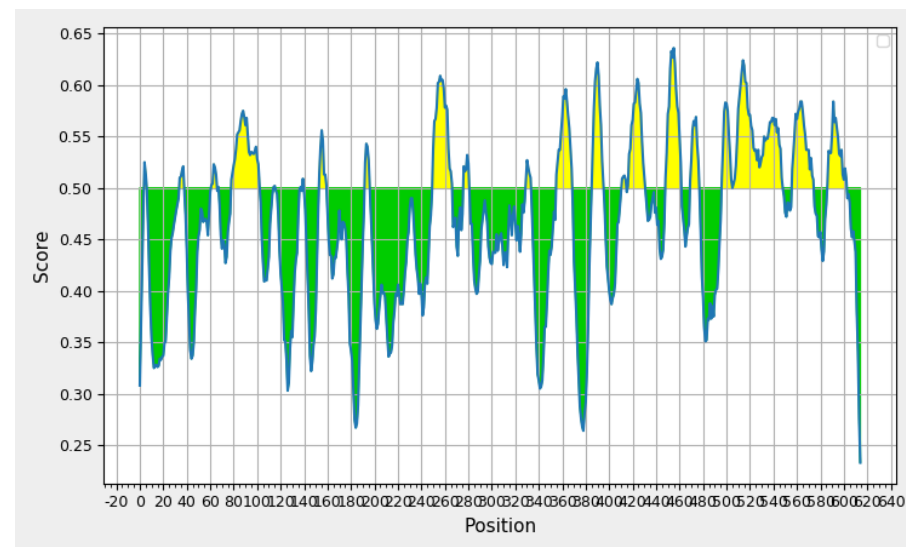

|    |     |     |                                                          |    |
|----|-----|-----|----------------------------------------------------------|----|
| 11 | 251 | 267 | <b>ERKTKKDLSGDPRALRR</b>                                 | 17 |
| 12 | 277 | 281 | RTLSN                                                    | 5  |
| 13 | 330 | 334 | <b>NIDKS</b>                                             | 5  |
| 14 | 356 | 369 | <b>SDFFNKKLEKSIN</b>                                     | 14 |
| 15 | 387 | 396 | GQATSADTND                                               | 10 |
| 16 | 412 | 415 | EGNI                                                     | 4  |
| 17 | 417 | 431 | APVVPRGQTVPTIKK                                          | 15 |
| 18 | 449 | 462 | <b>YQGERTNCEDNTSL</b>                                    | 14 |
| 19 | 470 | 477 | <b>IPPMKAGD</b>                                          | 8  |
| 20 | 497 | 548 | TEKSSGRSANITISNAVGKLSSTEIE<br>NMINDAAKFKSSDEAFSKRFESRQQL | 52 |
| 21 | 557 | 575 | <b>EIISDPTMSLKIKRGNKEK</b>                               | 19 |
| 22 | 587 | 603 | <b>LEIEDSSPEDLKKKELA</b>                                 | 17 |

Protein name: (M20\_dimer domain-containing protein)

Predicted peptides: XP\_002789172 [Pb01]

Bepipred Linear Epitope Prediction 2.0

| No. | Start | End | Peptide                                                     | Length |
|-----|-------|-----|-------------------------------------------------------------|--------|
| 1   | 6     | 26  | LPISRIAASLPPPTRLRAAVQ                                       | 21     |
| 2   | 48    | 102 | PSPYPSSSFYPLSIPRAVRPPSPSTSTVTRI<br>HRRSFYANIDDPKMAPQLEPFFKE | 55     |
| 3   | 104   | 109 | DNLQDA                                                      | 6      |
| 4   | 112   | 112 | <b>D</b>                                                    | 1      |
| 5   | 123   | 135 | VSAQDDKRKDVVK                                               | 13     |
| 6   | 145   | 146 | KR                                                          | 2      |
| 7   | 149   | 150 | <b>AE</b>                                                   | 2      |
| 8   | 154   | 166 | <b>RPLGKEHGREHLD</b>                                        | 13     |
| 9   | 195   | 204 | <b>ALLEDGWNTE</b>                                           | 10     |
| 10  | 207   | 211 | KLTVD                                                       | 5      |
| 11  | 243   | 243 | <b>V</b>                                                    | 1      |
| 12  | 273   | 276 | KKFF                                                        | 4      |
| 13  | 290   | 292 | LGT                                                         | 3      |
| 14  | 317   | 326 | <b>DLHSGVFGGS</b>                                           | 10     |

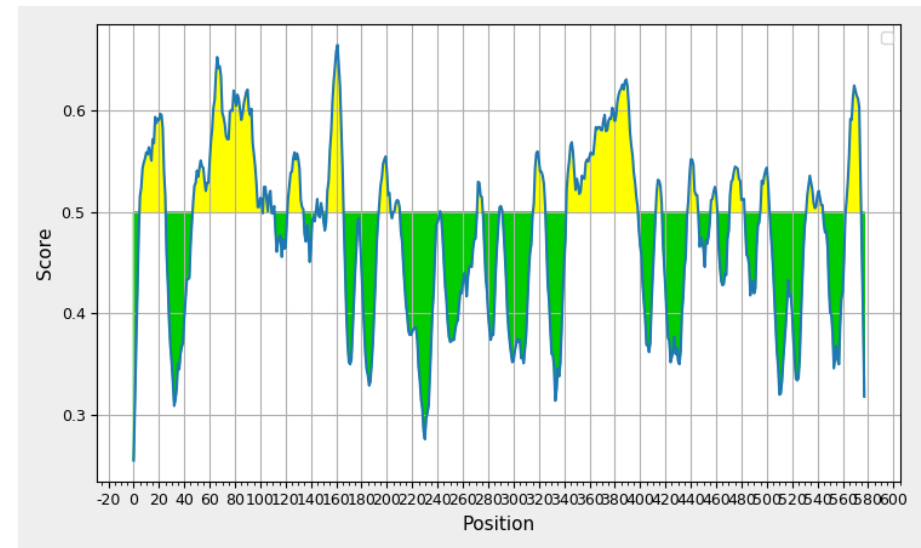

|    |     |     |                                                                |    |
|----|-----|-----|----------------------------------------------------------------|----|
| 15 | 343 | 399 | DVQGNILIPGINELVAPLTEDEKGLY<br>KDIAFSMENLYESLGSSTTSIFSDKEPTLMRR | 57 |
| 16 | 414 | 418 | YSAPG                                                          | 5  |
| 17 | 439 | 446 | <b>MESEDVNK</b>                                                | 8  |
| 18 | 457 | 462 | <b>AKLNSK</b>                                                  | 6  |
| 19 | 472 | 483 | <b>DGKWWVASPKHW</b>                                            | 12 |
| 20 | 496 | 503 | FGVEPDFT                                                       | 8  |
| 21 | 533 | 545 | <b>DMAHSTNEKLDKR</b>                                           | 13 |
| 22 | 564 | 575 | EPIKEQINTDNV                                                   | 12 |

Predicted peptides: XP\_010761260 [Pb18]

| No. | Start | End | Peptide                                       | Length |
|-----|-------|-----|-----------------------------------------------|--------|
| 1   | 9     | 24  | AASLPPPIRLRRAAVQ                              | 16     |
| 2   | 57    | 96  | LSLPR TIRPPSPSTSTVIRIHRRSFYANI<br>DDPKMAPQLEP | 40     |
| 3   | 99    | 100 | KE                                            | 2      |
| 4   | 102   | 104 | DIL                                           | 3      |
| 5   | 106   | 107 | DA                                            | 2      |
| 6   | 110   | 110 | <b>D</b>                                      | 1      |
| 7   | 121   | 133 | VSAQDDNRKDVVK                                 | 13     |

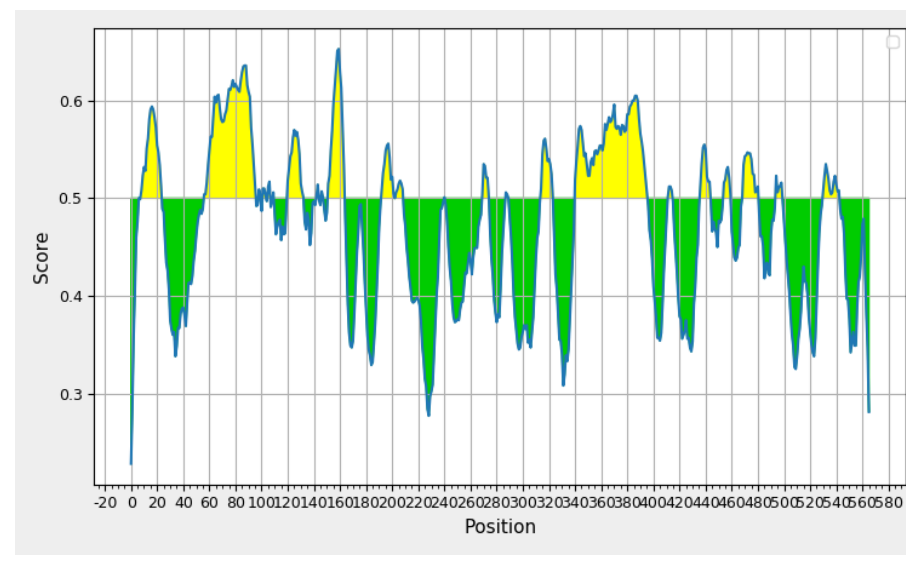

|    |     |     |                                                              |    |
|----|-----|-----|--------------------------------------------------------------|----|
| 8  | 143 | 144 | RR                                                           | 2  |
| 9  | 147 | 148 | <b>AE</b>                                                    | 2  |
| 10 | 152 | 164 | <b>RPLGKEHGREHLD</b>                                         | 13 |
| 11 | 193 | 202 | <b>ALLEDGWNTE</b>                                            | 10 |
| 12 | 204 | 209 | FKLTVD                                                       | 6  |
| 13 | 241 | 241 | <b>V</b>                                                     | 1  |
| 14 | 270 | 274 | SKKYF                                                        | 5  |
| 15 | 288 | 290 | <b>LGT</b>                                                   | 3  |
| 16 | 315 | 324 | <b>DLHSGVFGGS</b>                                            | 10 |
| 17 | 341 | 396 | DVQGNILIPGINELVAPLTEDEKGLYKDIA<br>FSMENLYESLGSTTSIFSEKEPTLMR | 56 |
| 18 | 412 | 415 | YSAP                                                         | 4  |
| 19 | 437 | 444 | <b>MESEDVNK</b>                                              | 8  |
| 20 | 455 | 460 | <b>AKLNSK</b>                                                | 6  |
| 21 | 470 | 481 | <b>DGKWWVASPKHW</b>                                          | 12 |
| 22 | 495 | 499 | GVEPD                                                        | 5  |
| 23 | 531 | 543 | <b>DMAHSTNEKLDKR</b>                                         | 13 |

Protein name: Acetyltransferase component of pyruvate dehydrogenase complex

Predicted peptides: XP\_002797511 [Pb01]

Bepipred Linear Epitope Prediction 2.0

| No. | Start | End | Peptide                                                                         | Length |
|-----|-------|-----|---------------------------------------------------------------------------------|--------|
| 1   | 6     | 6   | P                                                                               | 1      |
| 2   | 16    | 24  | <b>WQKKVGDAL</b>                                                                | 9      |
| 3   | 55    | 63  | REAGEKDIA                                                                       | 9      |
| 4   | 75    | 145 | GTDITPFESFSLEDAGGEKSSALK<br>EPEQPKKELKVAPAAPKEESTPAA<br>EEEPVSTGERLQPSLDRESFIAP | 71     |
| 5   | 156   | 200 | VPLKDIKGTGPGGRVTKNDVEK<br>YQPAGTAVSASGPAFEDIPASSM                               | 45     |
| 6   | 202   | 203 | KI                                                                              | 2      |
| 7   | 206   | 206 | N                                                                               | 1      |
| 8   | 209   | 215 | VQSMREN                                                                         | 7      |
| 9   | 238   | 245 | NSADGKYK                                                                        | 8      |
| 10  | 305   | 309 | <b>AHTLG</b>                                                                    | 5      |
| 11  | 328   | 333 | <b>KLKPEE</b>                                                                   | 6      |
| 12  | 379   | 385 | GEDGTSV                                                                         | 7      |
| 13  | 418   | 421 | <b>VENP</b>                                                                     | 4      |

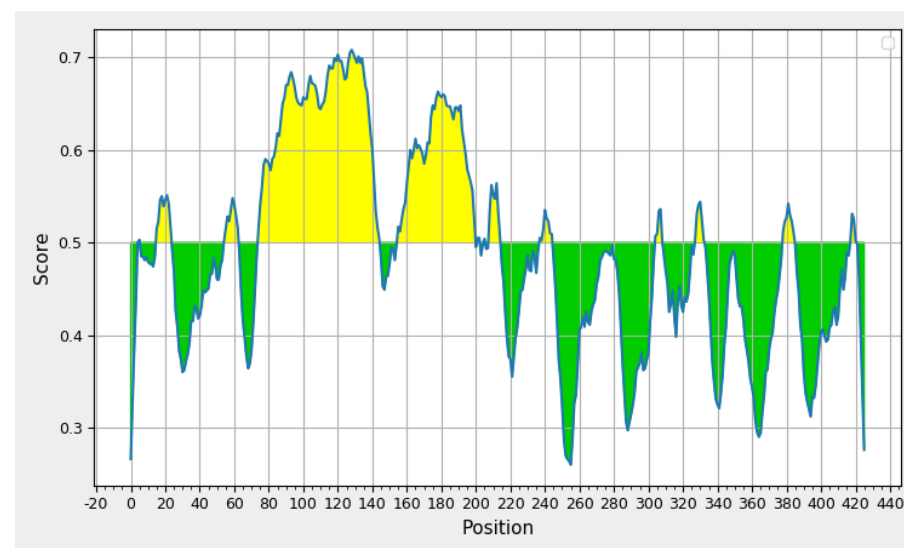



## Predicted peptides: XP\_010762465 [Pb18]

| No. | Start | End | Peptide                                                                              | Length |
|-----|-------|-----|--------------------------------------------------------------------------------------|--------|
| 1   | 7     | 82  | SRSASCRSLFSRSPPTCIRESGHMYRL<br>RDASRYGQCSRIWLLSLMFTLILVV<br>HRGRRQLPAFAALARFYASKSYPP | 76     |
| 2   | 92    | 94  | SPT                                                                                  | 3      |
| 3   | 103   | 111 | <b>WQKKVGDAL</b>                                                                     | 9      |
| 4   | 142   | 152 | REAGEKDVTVG                                                                          | 11     |
| 5   | 159   | 233 | VEEGTDITPFESFSLDAGGEKAPTLK<br>QPEQPKEELKVAPAAPKEESTPAAEE<br>EPVSTGERLQPSLDRESFIAPA   | 75     |
| 6   | 239   | 239 | L                                                                                    | 1      |
| 7   | 243   | 285 | VPLKDIKGTGPGGRVTKNDVEKY<br>QPAGTAVSGPPYEDIPASSM                                      | 43     |
| 8   | 294   | 299 | LQSMRE                                                                               | 6      |
| 9   | 326   | 328 | NGK                                                                                  | 3      |
| 10  | 330   | 330 | K                                                                                    | 1      |
| 11  | 390   | 394 | <b>AHTLG</b>                                                                         | 5      |
| 12  | 413   | 418 | <b>KLKPEE</b>                                                                        | 6      |
| 13  | 464   | 470 | GEDSTSV                                                                              | 7      |
| 14  | 503   | 506 | <b>VENP</b>                                                                          | 4      |

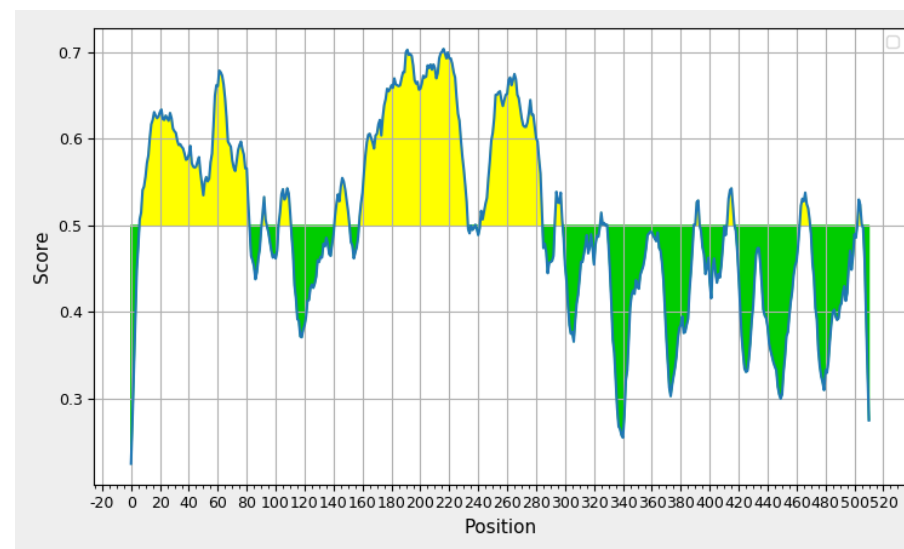

Protein name: Protein disulfide-isomerase

Predicted peptides: XP\_002797127 [Pb01]

Bepired Linear Epitope Prediction 2.0

| No. | Start | End | Peptide                                      | Length |
|-----|-------|-----|----------------------------------------------|--------|
| 1   | 23    | 29  | ADEAASD                                      | 7      |
| 2   | 57    | 60  | <b>CGHC</b>                                  | 4      |
| 3   | 91    | 100 | <b>ELCQEYGVG</b>                             | 10     |
| 4   | 111   | 124 | EQVKPYSGPRKSSS                               | 14     |
| 5   | 130   | 150 | VKQSLPAVTVVTVDNLEDVKT                        | 21     |
| 6   | 164   | 170 | DKATNET                                      | 7      |
| 7   | 210   | 248 | DEGKTVYKGGELTQEQVTSFIKLSSTPL<br>IGELGPHTYAGY | 39     |
| 8   | 264   | 271 | EEREFSK                                      | 8      |
| 9   | 303   | 304 | LK                                           | 2      |
| 10  | 318   | 334 | NNKKYPFDQELKITHDT                            | 17     |
| 11  | 337   | 337 | <b>T</b>                                     | 1      |
| 12  | 339   | 378 | VQDVLGDKVEPSIKSEPIPEKQEGP<br>VTVVVARSYQELVID | 40     |
| 13  | 392   | 395 | CGHC                                         | 4      |
| 14  | 408   | 416 | LYADNPEFA                                    | 9      |

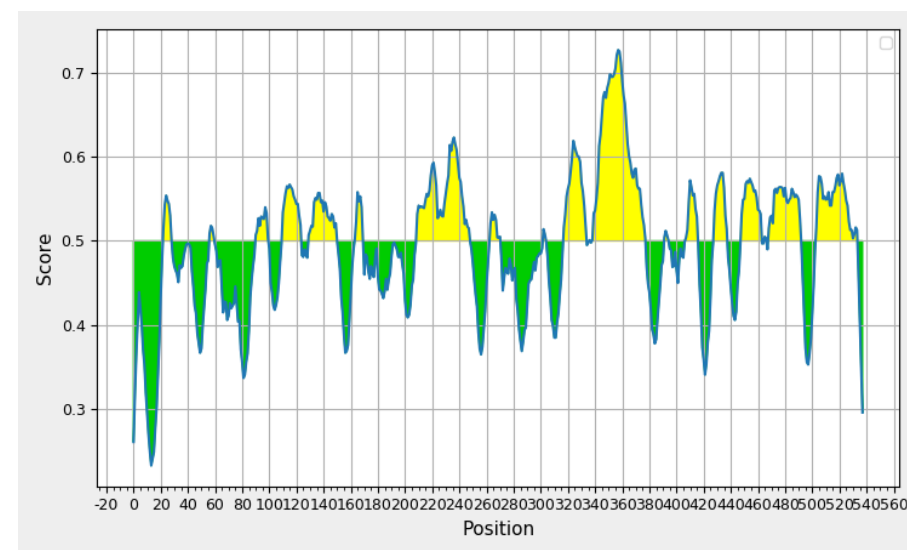

|    |     |     |                                 |    |
|----|-----|-----|---------------------------------|----|
| 15 | 429 | 438 | <b>NDVPEEIQGF</b>               | 10 |
| 16 | 449 | 463 | KDKPFDYQGLRTIQG                 | 15 |
| 17 | 466 | 467 | DF                              | 2  |
| 18 | 469 | 492 | RDNGKHKVDAYDESKVNEDDDDDDD       | 24 |
| 19 | 504 | 534 | SSSSTKTAEKKKDSKTTSSAAPKDTAAESAR | 31 |

**Predicted peptides: XP\_010759621 [Pb18]**

| No. | Start | End | Peptide               | Length |
|-----|-------|-----|-----------------------|--------|
| 1   | 22    | 30  | AADEAAVSD             | 9      |
| 2   | 58    | 61  | <b>CGHC</b>           | 4      |
| 3   | 92    | 101 | <b>ELCQEYGVEG</b>     | 10     |
| 4   | 112   | 125 | EQVKPYSGPRKSAS        | 14     |
| 5   | 132   | 149 | KQSLPAVTVVTVDNLEDV    | 18     |
| 6   | 151   | 151 | <b>T</b>              | 1      |
| 7   | 165   | 170 | DKATNE                | 6      |
| 8   | 194   | 194 | A                     | 1      |
| 9   | 211   | 225 | DEGKAVYSGELTQEQ       | 15     |
| 10  | 227   | 229 | TSF                   | 3      |
| 11  | 231   | 251 | KLSSTPLIGELGPHTYARYIQ | 21     |
| 12  | 264   | 272 | PEEREEFSK             | 9      |

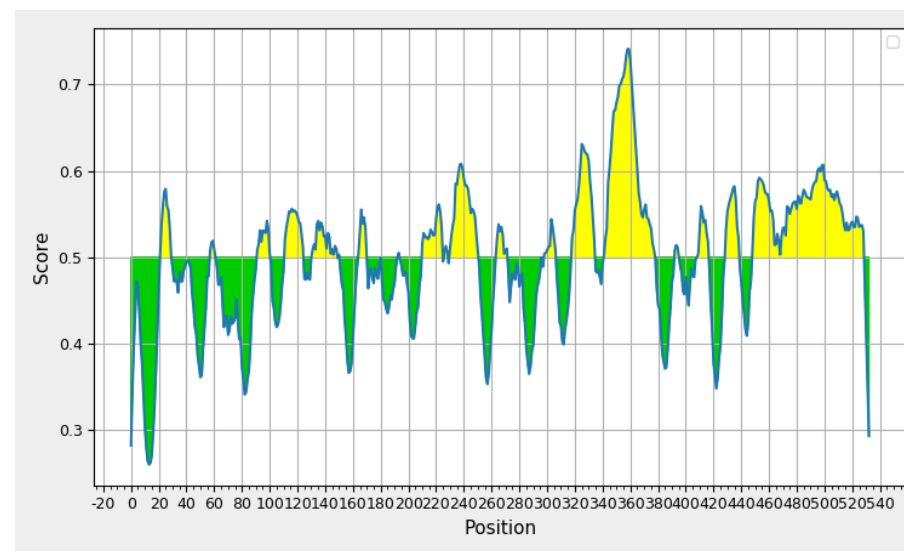

|    |     |     |                                                                                        |    |
|----|-----|-----|----------------------------------------------------------------------------------------|----|
| 13 | 299 | 307 | AGNLNLKVD                                                                              | 9  |
| 14 | 319 | 335 | NNKKYPFDQELKITHDI                                                                      | 17 |
| 15 | 342 | 378 | DVLDGKVEPSIKSEPIPEKQEGPV<br>TVVVAHSYQELVI                                              | 37 |
| 16 | 393 | 396 | CGHC                                                                                   | 4  |
| 17 | 410 | 417 | YADNPEFA                                                                               | 8  |
| 18 | 430 | 439 | <b>NDVPEEIQGF</b>                                                                      | 10 |
| 19 | 449 | 529 | SKDKPFDYQGSRTIQGLAEFVRDNGKH<br>KVDAYDESKVTEDDDVTETPASPSSSTKA<br>ADEKKETKTSSAAPKDAAEGAR | 81 |

Protein name: HSP7-like protein

Predicted peptides: XP\_015703361 [Pb01]

Bepipred Linear Epitope Prediction 2.0

| No. | Start | End | Peptide                     | Length |
|-----|-------|-----|-----------------------------|--------|
| 1   | 5     | 29  | RFSRALPRAVPSFARSSSRSSAYKL   | 25     |
| 2   | 34    | 48  | FRRWNSTEGGEEKVK             | 15     |
| 3   | 107   | 107 | V                           | 1      |
| 4   | 119   | 144 | LIGRKFTDPECQRDLEKVPYKIVQHA  | 26     |
| 5   | 194   | 198 | <b>NDSQR</b>                | 5      |
| 6   | 287   | 302 | KKESGIDLSNDRMAIQ            | 16     |
| 7   | 316   | 321 | SSALQT                      | 6      |
| 8   | 330   | 337 | <b>ADSSGAKH</b>             | 8      |
| 9   | 370   | 374 | <b>NLQAK</b>                | 5      |
| 10  | 398   | 408 | IFGRDPAKSVN                 | 11     |
| 11  | 426   | 430 | GEVTD                       | 5      |
| 12  | 438   | 464 | PLSLGIETLGGVFTRLINRNTTIPTKK | 27     |
| 13  | 473   | 473 | D                           | 1      |
| 14  | 484   | 499 | QGERELVRDNKLLGNF            | 16     |
| 15  | 502   | 512 | VGIPPAHRGVP                 | 11     |

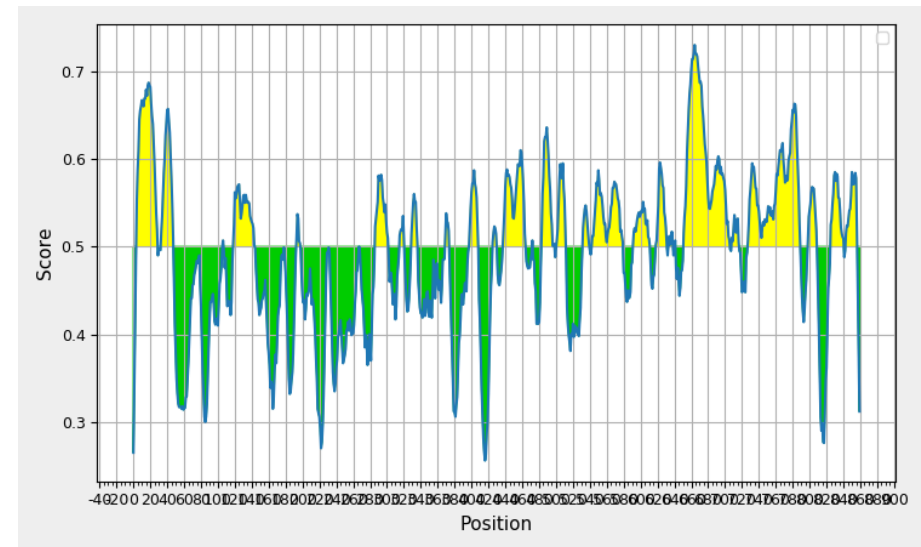

|    |     |     |                                                                      |    |
|----|-----|-----|----------------------------------------------------------------------|----|
| 16 | 533 | 540 | KSTGKDQS                                                             | 8  |
| 17 | 544 | 580 | ASGSLSDTEIQNMVDDAEKFGAQD<br>KERKAAIEAANR                             | 37 |
| 18 | 592 | 611 | LKEFEDKLDKTEADQIKEKI                                                 | 20 |
| 19 | 619 | 632 | <b>AKSQSGEGSITADE</b>                                                | 14 |
| 20 | 634 | 639 | KAKVDE                                                               | 6  |
| 21 | 641 | 642 | QN                                                                   | 2  |
| 22 | 652 | 706 | HKARSEEGQQQSQSNEGQQGDSNLL<br>TETFDLIVSPANSFGRLDsafNGAISRA            | 55 |
| 23 | 709 | 717 | LPHHNYNSF                                                            | 9  |
| 24 | 728 | 789 | RWRGYAPPGSCTLVFPFAEI<br>AWTAPWVHCVRLCGCRSVEGVE<br>RGGRVQEGDREGDGERKR | 62 |
| 25 | 799 | 809 | VVGVGNSKEK                                                           | 11 |
| 26 | 826 | 841 | ERTERWRRLEWSMLGR                                                     | 16 |
| 27 | 844 | 857 | FEVKKTWREKQKAW                                                       | 14 |

## Predicted peptides: XP\_010756347 [Pb18]

| No. | Start | End | Peptide                   | Length |
|-----|-------|-----|---------------------------|--------|
| 1   | 5     | 29  | RFSRALPRAVPSFARSSARSSAYKL | 25     |
| 2   | 31    | 31  | A                         | 1      |
| 3   | 35    | 47  | RRWNSTEGGEEKV             | 13     |
| 4   | 106   | 107 | VV                        | 2      |
| 5   | 120   | 138 | IGRKFTDPECQRDLEKVPY       | 19     |
| 6   | 142   | 143 | QH                        | 2      |
| 7   | 179   | 179 | G                         | 1      |
| 8   | 194   | 198 | <b>NDSQR</b>              | 5      |
| 9   | 230   | 232 | REQ                       | 3      |
| 10  | 267   | 268 | TH                        | 2      |
| 11  | 287   | 303 | KKESGIDLSNDRMAIQR         | 17     |
| 12  | 315   | 321 | LSSALQT                   | 7      |
| 13  | 330   | 337 | <b>ADSSGAKH</b>           | 8      |
| 14  | 370   | 374 | <b>NLQAK</b>              | 5      |
| 15  | 398   | 409 | IFGRDPAKSVNP              | 12     |
| 16  | 426   | 428 | GEV                       | 3      |
| 17  | 447   | 449 | GGV                       | 3      |

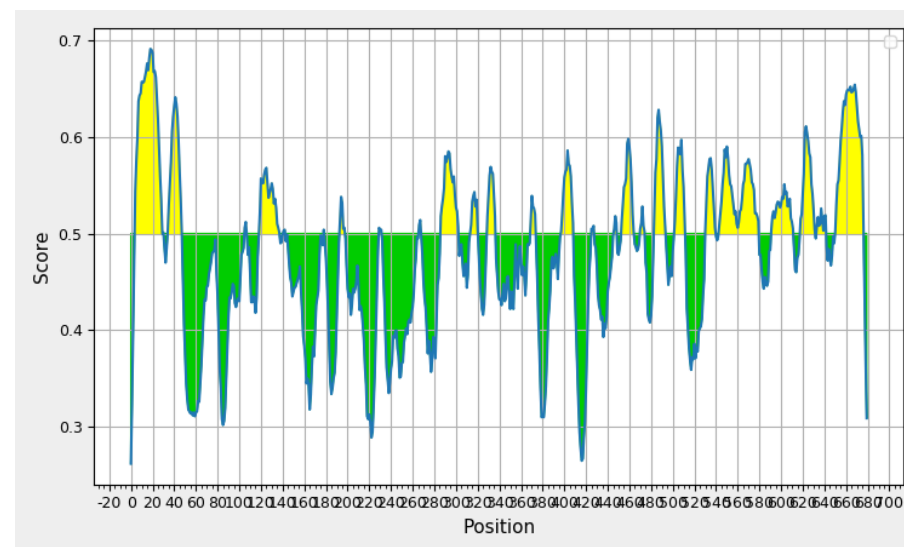

|    |     |     |                                          |    |
|----|-----|-----|------------------------------------------|----|
| 18 | 454 | 465 | INRNTTIPTKKS                             | 12 |
| 19 | 471 | 475 | AADFQ                                    | 5  |
| 20 | 484 | 494 | QGERELVRDNK                              | 11 |
| 21 | 503 | 512 | GIPPAHRGVP                               | 10 |
| 22 | 531 | 540 | KDKSTGKDQS                               | 10 |
| 23 | 544 | 580 | ASGGLSDAEIQNMVDDAEKFG<br>AQDKERKAAIEAANR | 37 |
| 24 | 592 | 612 | LKEFEDKLDKTEADQIKEKIA                    | 21 |
| 25 | 619 | 632 | <b>AKSQSGEGSITADE</b>                    | 14 |
| 26 | 634 | 642 | KAKVDELQN                                | 9  |
| 27 | 651 | 677 | MHKARSEDGQQQQSQSNQSQS                    | 27 |



Protein name: Uncharacterized protein (NBD sugar kinase HSP70 actin superfamily)

Predicted peptides: XP\_002790451 [Pb01]

Bepipred Linear Epitope Prediction 2.0

| No. | Start | End | Peptide              | Length |
|-----|-------|-----|----------------------|--------|
| 1   | 28    | 31  | NEVS                 | 4      |
| 2   | 55    | 60  | QEISNL               | 6      |
| 3   | 72    | 91  | GRSFNDPDVQIEQDYNSATL | 20     |
| 4   | 93    | 97  | DVNGE                | 5      |
| 5   | 106   | 110 | GKKEQ                | 5      |
| 6   | 131   | 134 | <b>ELKL</b>          | 4      |
| 7   | 147   | 152 | FTDAQR               | 6      |
| 8   | 185   | 193 | FDLPTAEEK            | 9      |
| 9   | 248   | 262 | KEKFNIDIKTNLKAW      | 15     |
| 10  | 274   | 275 | KI                   | 2      |
| 11  | 277   | 278 | SA                   | 2      |
| 12  | 306   | 306 | <b>E</b>             | 1      |
| 13  | 328   | 331 | LKPE                 | 4      |
| 14  | 354   | 366 | <b>EFFGKPLSFTLNQ</b> | 13     |
| 15  | 382   | 392 | SPVFRVRDFSV          | 11     |

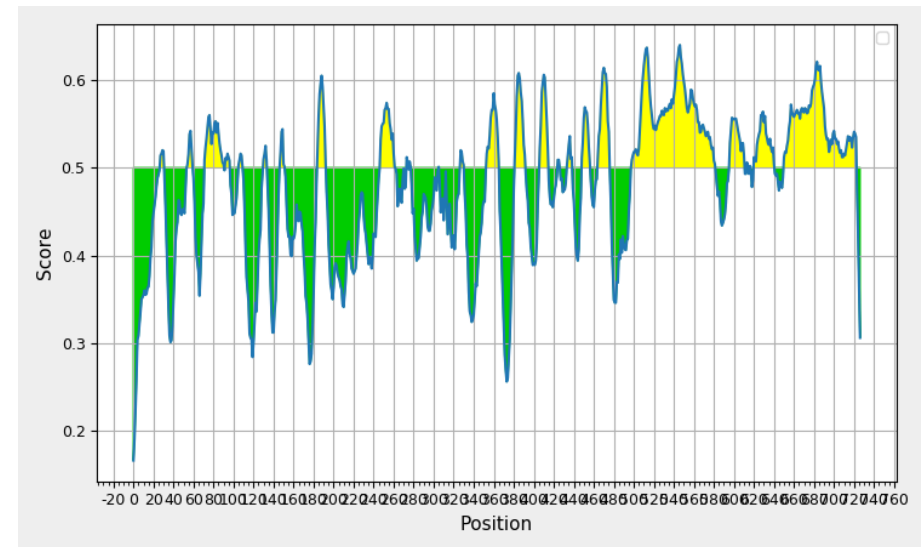

|    |     |     |                                                                                              |    |
|----|-----|-----|----------------------------------------------------------------------------------------------|----|
| 16 | 407 | 415 | APDIPDEAT                                                                                    | 9  |
| 17 | 425 | 427 | VMP                                                                                          | 3  |
| 18 | 434 | 439 | FYRKQP                                                                                       | 6  |
| 19 | 449 | 457 | IDGLPGKTN                                                                                    | 9  |
| 20 | 465 | 476 | VKGITSSDGDF                                                                                  | 12 |
| 21 | 499 | 582 | VEDVEVEEPIPEKEGDAMDTDAPNG<br>DAEDGKPKMRKVKKQVRKGDLPVSGGTA<br>GLDPESKERLTEKENAMYMEDKLVADTEDKK | 84 |
| 22 | 597 | 611 | DGVYSEFASDEEKT                                                                               | 15 |
| 23 | 614 | 614 | <b>T</b>                                                                                     | 1  |
| 24 | 617 | 617 | D                                                                                            | 1  |
| 25 | 621 | 641 | <b>DWLYEDGEDTTKAVYISKMDD</b>                                                                 | 21 |
| 26 | 651 | 723 | QRYTDKVEAERAAAQKAQEEAAAKR<br>REEQEAQAQEAAKKAAGPPPAADAEM<br>KMDAAAPAGEVDKNADESMAEV            | 73 |

## Predicted peptides: XP\_010758132 [Pb18]

| No. | Start | End | Peptide              | Length |
|-----|-------|-----|----------------------|--------|
| 1   | 5     | 8   | DKLS                 | 4      |
| 2   | 33    | 36  | EISN                 | 4      |
| 3   | 49    | 64  | GRSFNDPDVQIEQDYN     | 16     |
| 4   | 71    | 73  | VNG                  | 3      |
| 5   | 83    | 88  | GKKEQF               | 6      |
| 6   | 108   | 111 | <b>ELKL</b>          | 4      |
| 7   | 125   | 127 | TODA                 | 3      |
| 8   | 163   | 170 | DLPTAEEK             | 8      |
| 9   | 224   | 240 | FKEKFNIDIKTNLKAWT    | 17     |
| 10  | 254   | 254 | S                    | 1      |
| 11  | 283   | 283 | <b>E</b>             | 1      |
| 12  | 304   | 308 | DLKPE                | 5      |
| 13  | 331   | 343 | <b>EFFGKPLSFTLNQ</b> | 13     |
| 14  | 360   | 370 | PVFRVRDFSVH          | 11     |
| 15  | 383   | 392 | RAPDIPDEAT           | 10     |
| 16  | 401   | 417 | NVMPSTKILTFYRKQPF    | 17     |
| 17  | 426   | 433 | IDRLPGKT             | 8      |

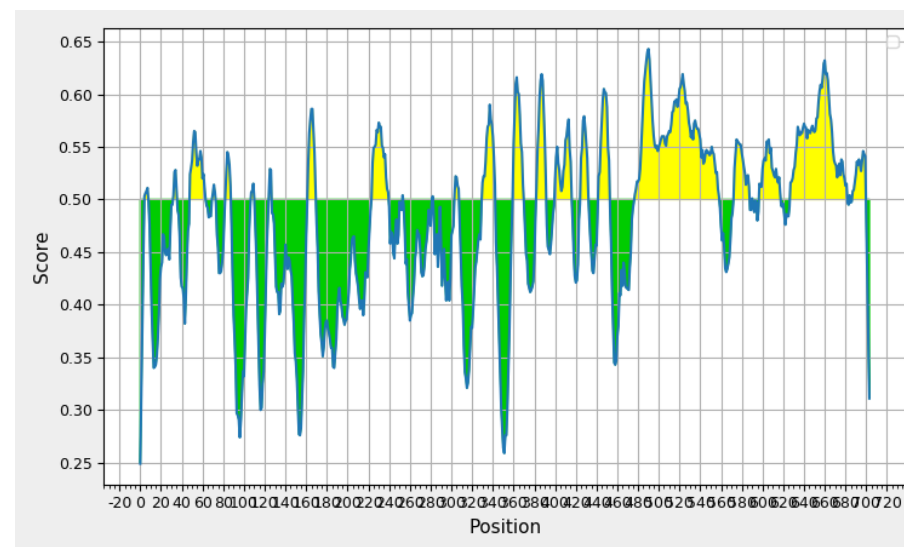

|    |     |     |                                                                                            |    |
|----|-----|-----|--------------------------------------------------------------------------------------------|----|
| 18 | 443 | 453 | KGITESSDGDF                                                                                | 11 |
| 19 | 478 | 559 | DVEVEEPIPEKEGDAMDTDAPNGDA<br>EDGKPKMRKVKKQVRKGDLPVSGGTAGLD<br>AESKERLTEKENAMYMEDKLVADTEDKK | 82 |
| 20 | 573 | 588 | IDGVYSEFASDEEKT                                                                            | 16 |
| 21 | 591 | 591 | <b>T</b>                                                                                   | 1  |
| 22 | 598 | 618 | <b>DWLYEDGEDTTKAVYISKMDD</b>                                                               | 21 |
| 23 | 628 | 682 | QRYTDKVEAERAAAQKAQEE<br>AAAKRREEQEAAEEAAKAA<br>GPPPAADAEMKMDMA                             | 55 |
| 24 | 685 | 685 | P                                                                                          | 1  |
| 25 | 688 | 700 | EVDKNADESMAEV                                                                              | 13 |

Protein name: Aconitate hydratase, mitochondrial

Predicted peptides: XP\_015699682 [Pb01]

Bepipred Linear Epitope Prediction 2.0

| No. | Start | End | Peptide                              | Length |
|-----|-------|-----|--------------------------------------|--------|
| 1   | 6     | 23  | RFARV GALASKSRNLLGA                  | 18     |
| 2   | 31    | 56  | ENPLDKK VEMCNYEKGN YINYKKMAE         | 26     |
| 3   | 66    | 74  | NRPLTYAEK                            | 9      |
| 4   | 81    | 92  | DDPHEQDIHRGK                         | 12     |
| 5   | 121   | 124 | MPSV                                 | 4      |
| 6   | 139   | 156 | QVGGEKDLARANEINKEV                   | 18     |
| 7   | 278   | 283 | VNSLSC                               | 6      |
| 8   | 314   | 341 | <b>KATKRQAIGDFARSYAHSLREDEGA EYD</b> | 28     |
| 9   | 358   | 366 | PFTPLATP                             | 9      |
| 10  | 372   | 380 | DAVKENGWP                            | 9      |
| 11  | 397   | 397 | E                                    | 1      |
| 12  | 411   | 414 | <b>DHGI</b>                          | 4      |
| 13  | 436   | 440 | <b>DGQLK</b>                         | 5      |
| 14  | 461   | 470 | <b>WDRRDVKKGE</b>                    | 10     |
| 15  | 482   | 488 | <b>FTGRNDA</b>                       | 7      |

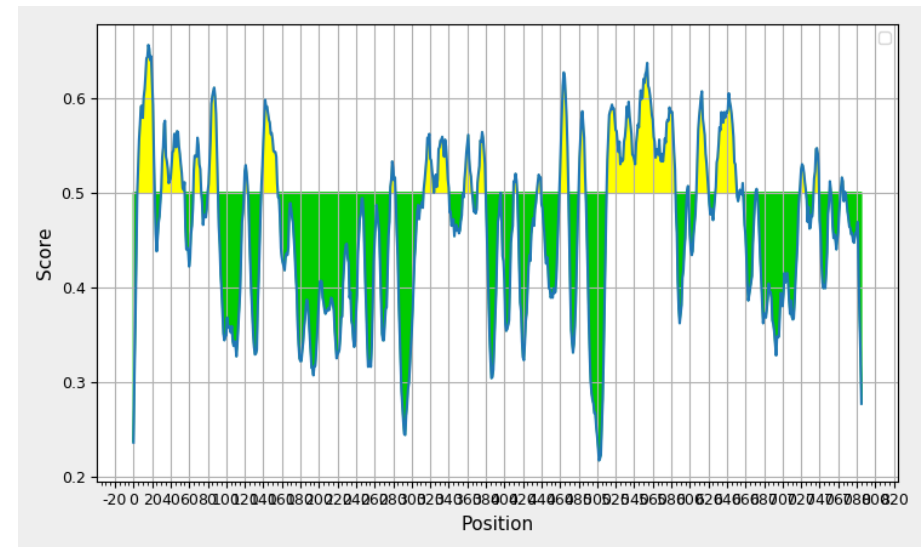

|    |     |     |                                                                                             |    |
|----|-----|-----|---------------------------------------------------------------------------------------------|----|
| 16 | 512 | 585 | <b>NFNPLDTLKDGDGKEFKLKEPTG<br/>AGLPANGYDPGRDITYQAPPKDRSSIS<br/>VAVSPTSDDLQILKAFQPWDGKDA</b> | 74 |
| 17 | 598 | 599 | <b>TT</b>                                                                                   | 2  |
| 18 | 608 | 620 | PWLKYRGHLDNIS                                                                               | 13 |
| 19 | 629 | 651 | NAENGEANKVKNFKTGEYGPVPA                                                                     | 23 |
| 20 | 655 | 656 | DY                                                                                          | 2  |
| 21 | 658 | 658 | A                                                                                           | 1  |
| 22 | 672 | 673 | GE                                                                                          | 2  |
| 23 | 720 | 726 | DYDRIRP                                                                                     | 7  |
| 24 | 735 | 740 | <b>TELAVG</b>                                                                               | 6  |
| 25 | 752 | 753 | <b>GK</b>                                                                                   | 2  |
| 26 | 764 | 766 | <b>NEP</b>                                                                                  | 3  |
| 27 | 768 | 769 | LQ                                                                                          | 2  |

## Predicted peptides: XP\_010760563 [Pb18]

| No. | Start | End | Peptide                                                                                               | Length |
|-----|-------|-----|-------------------------------------------------------------------------------------------------------|--------|
| 1   | 6     | 15  | DIVRSRLNRP                                                                                            | 10     |
| 2   | 29    | 39  | DPHEQDIHRGK                                                                                           | 11     |
| 3   | 69    | 70  | PS                                                                                                    | 2      |
| 4   | 86    | 105 | QVGGEKDLARANEINKEVYD                                                                                  | 20     |
| 5   | 226   | 230 | NSLSC                                                                                                 | 5      |
| 6   | 255   | 255 | R                                                                                                     | 1      |
| 7   | 261   | 288 | <b>KATKRQAIGDFARSYAHSLREDEGAEYD</b>                                                                   | 28     |
| 8   | 305   | 316 | PFTPDLATPISK                                                                                          | 12     |
| 9   | 318   | 328 | KDAVKENGWPE                                                                                           | 11     |
| 10  | 358   | 361 | <b>DHGI</b>                                                                                           | 4      |
| 11  | 383   | 387 | <b>DGQLK</b>                                                                                          | 5      |
| 12  | 408   | 417 | <b>WDRRDVKKGE</b>                                                                                     | 10     |
| 13  | 429   | 435 | <b>FTGRNDA</b>                                                                                        | 7      |
| 14  | 459   | 532 | <b>NFNPLDTLKDGDGKEFKLKEPT</b><br><b>GAGLPANGYDPGRDTYQAPPKDRSS</b><br><b>ISVAVSPTSRLQILKAFQPWDGKDA</b> | 74     |
| 15  | 545   | 546 | <b>TT</b>                                                                                             | 2      |
| 16  | 555   | 566 | PWLKYRGHLDNI                                                                                          | 12     |

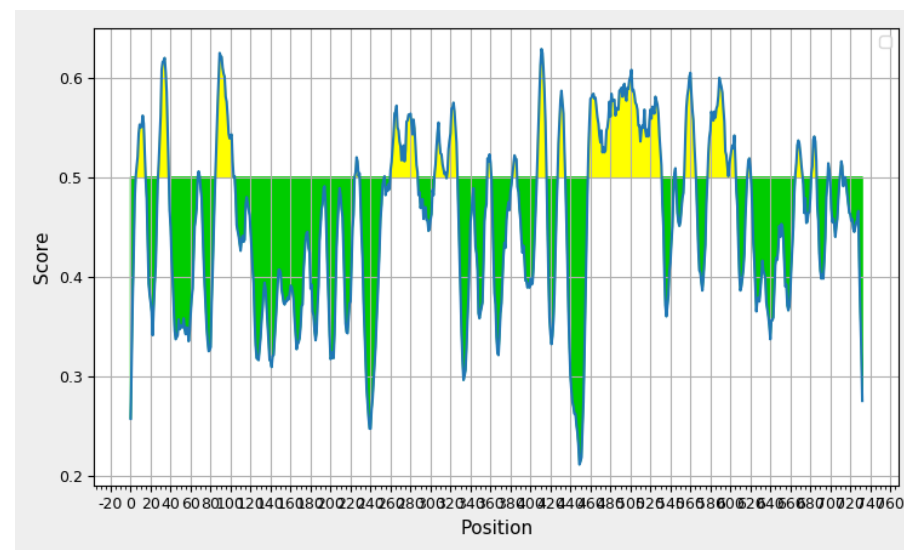

|    |     |     |                              |    |
|----|-----|-----|------------------------------|----|
| 17 | 579 | 606 | NGEANKVKNFKTGEYGPVPATARDYKAR | 28 |
| 18 | 618 | 621 | YGEG                         | 4  |
| 19 | 666 | 673 | ADYDRIRP                     | 8  |
| 20 | 682 | 687 | <b>TELAGV</b>                | 6  |
| 21 | 699 | 700 | <b>GK</b>                    | 2  |
| 22 | 711 | 713 | <b>NEP</b>                   | 3  |
| 23 | 716 | 716 | Q                            | 1  |



## Reference

1. de Camargo, Z.P.; Unterkircher, C.; Campoy, S.P.; Travassos, L.R. Production of *Paracoccidioides brasiliensis* exoantigens for immunodiffusion tests. *J Clin Microbiol* **1988**, *26*, 2147-2151.
2. Gegembauer, G.; Araujo, L.M.; Pereira, E.F.; Rodrigues, A.M.; Paniago, A.M.; Hahn, R.C.; de Camargo, Z.P. Serology of paracoccidioidomycosis due to *Paracoccidioides lutzii*. *PLoS Negl Trop Dis* **2014**, *8*, e2986, doi:10.1371/journal.pntd.0002986.
3. Laskowski, R.A.; MacArthur, M.W.; Moss, D.S.; Thornton, J.M. PROCHECK: a program to check the stereochemical quality of protein structures. *Journal of Applied Crystallography* **1993**, *26*, 283-291, doi:10.1107/S0021889892009944.
4. Darzi, Y.; Letunic, I.; Bork, P.; Yamada, T. iPath3.0: interactive pathways explorer v3. *Nucleic Acids Research* **2018**, *46*, W510-W513, doi:10.1093/nar/gky299.
5. Jespersen, M.C.; Peters, B.; Nielsen, M.; Marcatili, P. BepiPred-2.0: improving sequence-based B-cell epitope prediction using conformational epitopes. *Nucleic Acids Research* **2017**, *45*, W24-W29, doi:10.1093/nar/gkx346.
